# Supplementary material for: Economic correlates of footbinding: Implications for the importance of Chinese daughters’ labor
Source: PLoS One. 2018 Sep 20;13(9):e0201337. doi: 10.1371/journal.pone.0201337 (PMC6147408; doi:10.1371/journal.pone.0201337)
Supplement: S1 Dataset — (XLSX) [file pone.0201337.s005.xlsx]

## Sheet: fbFinal.csv
region	province	county	ID #	egoFB	egoFBBin	fb1YrBin	birthYr	egoAnyEd	egoLit	mothEdAny	fathEdAny	handLabUseL	handLabComL	anyAgLab_FINAL	mothFB	prohib	mmi	spAnyUse	spAnyCom	weAnyUse	weAnyCom	AnyHCUse	AnyHCCom	MSpAny	SpCotAmt	weHCCom	weHCUse	spinAge	loom	marYear	fbBefMarStr	labYrs
N	Anhui	1101	1101001	y	1	1	1924	none	illit	none	none	NA	NA	y	y	n	3	y	n	y	n	NA	NA	NA	NA	FALSE	TRUE	14.5	y	1945	TRUE	6.5
N	Anhui	1101	1101002	n	0	0	1941	none	illit	none	some	FALSE	FALSE	y	y	y	3	n	n	n	n	n	n	NA	NA	FALSE	FALSE	NA	y	1960	NA	NA
N	Anhui	1101	1101003	n	0	0	1942	none	illit	none	none	FALSE	FALSE	y	y	y	4	n	n	n	n	n	n	NA	NA	FALSE	FALSE	12	n	1964	NA	10
N	Anhui	1101	1101005	n	0	0	1929	none	illit	none	none	NA	TRUE	y	y	n	0	y	n	n	n	NA	y	NA	NA	TRUE	FALSE	7.5	n	1951	NA	14.5
N	Anhui	1101	1101007	n	0	0	1933	none	illit	none	none	TRUE	FALSE	y	y	y	0	y	n	n	n	n	n	NA	NA	FALSE	FALSE	12	n	1955	NA	10
N	Anhui	1101	1101008	n	0	0	1941	none	illit	none	none	NA	NA	y	y	y	4	y	n	y	n	NA	NA	NA	NA	FALSE	TRUE	15	y	1962	NA	6
N	Anhui	1101	1101009	n	0	0	1926	none	illit	none	none	NA	NA	y	y	n	3	n	n	n	n	NA	NA	NA	NA	FALSE	FALSE	NA	n	1946	NA	NA
N	Anhui	1101	1101010	n	0	0	1935	none	illit	none	none	NA	NA	y	y	n	3	y	n	n	n	NA	NA	NA	NA	FALSE	FALSE	12	y	1952	NA	5
N	Anhui	1101	1101011	y	1	NA	1920	none	illit	none	none	NA	NA	y	y	n	4	y	n	n	n	NA	NA	NA	NA	FALSE	FALSE	8.5	y	1939	TRUE	10.5
N	Anhui	1101	1101012	n	0	0	1938	none	illit	none	none	NA	NA	y	y	y	2	y	n	n	n	NA	NA	NA	NA	FALSE	FALSE	12	n	1957	NA	7
N	Anhui	1101	1101013	n	0	0	1936	none	illit	none	none	NA	NA	y	y	n	3	y	n	n	n	NA	NA	NA	NA	FALSE	FALSE	18.5	y	1960	NA	5.5
N	Anhui	1101	1101014	y	1	NA	1927	none	illit	none	none	NA	NA	y	y	n	3	y	n	n	n	NA	NA	NA	NA	FALSE	FALSE	12	y	1950.5	TRUE	11.5
N	Anhui	1101	1101016	y	1	NA	1928	none	illit	none	none	NA	NA	y	y	y	3	n	n	n	n	NA	NA	NA	NA	FALSE	FALSE	22	n	1949	TRUE	-1
N	Anhui	1101	1101017	NA	NA	NA	1937	none	illit	none	none	NA	NA	y	y	y	3	y	n	n	n	NA	NA	NA	NA	FALSE	FALSE	20.5	n	1956	NA	-1.5
N	Anhui	1101	1101020	n	0	0	1930	none	illit	none	none	FALSE	FALSE	y	y	y	4	n	n	n	n	n	n	NA	NA	FALSE	FALSE	NA	n	1952	NA	NA
N	Anhui	1101	1101021	n	0	0	1940	none	illit	none	none	FALSE	FALSE	y	y	y	3	n	n	n	n	n	n	NA	NA	FALSE	FALSE	NA	n	1960	NA	NA
N	Anhui	1101	1101026	y	1	1	1925	none	illit	none	NA	NA	NA	y	NA	y	4	y	n	y	n	NA	NA	NA	NA	FALSE	TRUE	11	y	1945	TRUE	9
N	Anhui	1101	1101028	n	0	0	1936	none	illit	none	none	TRUE	FALSE	y	y	y	4	y	n	n	n	n	n	NA	NA	FALSE	FALSE	14	y	1955	NA	5
N	Anhui	1101	1101029	y	1	1	1926	none	illit	none	none	FALSE	FALSE	y	y	y	4	n	n	n	n	n	n	NA	NA	FALSE	FALSE	20.5	y	1946	TRUE	-0.5
N	Anhui	1101	1101030	y	1	1	1930	none	illit	none	none	TRUE	FALSE	y	y	y	3	y	n	n	n	y	n	NA	NA	FALSE	TRUE	13.5	n	1950	TRUE	6.5
N	Anhui	1101	1101031	y	1	1	1933	none	illit	none	none	TRUE	FALSE	y	y	y	3	n	n	n	n	y	n	NA	NA	FALSE	TRUE	NA	n	1954	TRUE	NA
N	Anhui	1101	1101032	y	1	NA	1916	none	illit	none	some	TRUE	FALSE	n	y	y	4	n	n	n	n	y	n	NA	NA	FALSE	TRUE	NA	y	1933	TRUE	NA
N	Anhui	1101	1101033	y	1	1	1919	none	illit	none	none	NA	NA	n	y	y	3	n	n	n	n	NA	NA	NA	NA	FALSE	FALSE	NA	n	1940	TRUE	NA
N	Anhui	1101	1101034	n	0	0	1929	none	illit	none	some	TRUE	FALSE	y	y	y	4	y	n	y	n	y	n	NA	NA	FALSE	TRUE	13	n	1945	NA	3
N	Anhui	1101	1101035	y	1	1	1932	none	illit	none	none	TRUE	FALSE	y	y	y	3	n	n	n	n	y	n	NA	NA	FALSE	TRUE	NA	n	1950	TRUE	NA
N	Anhui	1101	1101036	y	1	NA	1931	none	illit	none	none	FALSE	FALSE	y	y	y	3	n	n	n	n	n	n	NA	NA	FALSE	FALSE	20.5	n	1950	NA	-1.5
N	Anhui	1101	1101037	y	1	1	1930	none	illit	none	none	TRUE	FALSE	y	y	y	4	y	n	y	n	n	n	NA	NA	FALSE	TRUE	16	y	1952	TRUE	6
N	Anhui	1101	1101038	y	1	NA	1928	none	illit	none	none	TRUE	FALSE	y	y	y	4	y	n	y	n	y	n	NA	NA	FALSE	TRUE	13	y	1947	TRUE	6
N	Anhui	1101	1101039	y	1	NA	1928	none	illit	none	none	TRUE	FALSE	y	y	y	1	y	n	y	n	y	n	NA	NA	FALSE	TRUE	11	y	1950	NA	11
N	Anhui	1101	1101040	y	1	NA	1932	none	illit	none	none	TRUE	FALSE	y	y	y	3	y	n	y	n	y	n	NA	NA	FALSE	TRUE	13	n	1950	TRUE	5
N	Anhui	1101	1101041	y	1	NA	1927	none	illit	none	none	TRUE	FALSE	y	y	y	4	y	n	y	n	n	n	NA	NA	FALSE	TRUE	11	y	1948	TRUE	10
N	Anhui	1101	1101042	y	1	NA	1927	none	illit	none	none	TRUE	FALSE	y	y	y	4	n	n	n	n	y	n	NA	NA	FALSE	TRUE	NA	y	1950	TRUE	NA
N	Anhui	1101	1101043	y	1	NA	1918	none	illit	none	none	TRUE	FALSE	n	y	y	3	y	n	y	n	y	n	NA	NA	FALSE	TRUE	13	n	1940	TRUE	9
N	Anhui	1101	1101044	n	0	0	1938	none	illit	none	some	TRUE	FALSE	y	y	y	3	y	n	n	n	y	n	NA	NA	FALSE	TRUE	5.5	y	1961	NA	17.5
N	Anhui	1101	1101045	y	1	NA	1941	some	lit	none	NA	TRUE	FALSE	y	y	n	4	n	n	n	n	y	n	NA	NA	FALSE	TRUE	20	y	1960	TRUE	-1
N	Anhui	1101	1101046	n	0	0	1934	none	illit	none	none	TRUE	FALSE	y	y	y	3	n	n	n	n	y	n	NA	NA	FALSE	TRUE	NA	y	1953	NA	NA
N	Anhui	1101	1101047	y	1	1	1919	none	illit	none	none	TRUE	FALSE	y	y	NA	4	n	n	n	n	y	n	NA	NA	FALSE	TRUE	NA	n	1939	TRUE	NA
N	Anhui	1101	1101048	n	0	0	1931	none	illit	none	none	TRUE	FALSE	y	y	y	1	y	n	y	n	y	n	NA	0.5	FALSE	TRUE	16	n	1947	NA	0
N	Anhui	1101	1101049	y	1	1	1925	none	illit	none	none	TRUE	FALSE	y	y	y	4	y	n	n	n	y	n	NA	NA	FALSE	TRUE	12	n	1942	TRUE	5
N	Anhui	1101	1101050	n	0	0	1930	none	illit	none	none	TRUE	FALSE	y	y	y	4	n	n	n	n	y	n	NA	NA	FALSE	TRUE	22	y	1951	NA	-1
N	Anhui	1101	1101051	y	1	1	1936	some	half	none	none	TRUE	FALSE	y	y	y	4	y	n	y	n	y	n	NA	NA	FALSE	TRUE	11	y	1955	TRUE	8
N	Anhui	1101	1101052	y	1	NA	1936	none	illit	none	none	TRUE	FALSE	y	y	y	4	y	n	y	n	y	n	NA	NA	FALSE	TRUE	10	n	1955	NA	9
N	Anhui	1101	1101053	n	0	0	1934	none	illit	none	some	TRUE	FALSE	y	y	y	4	y	n	n	n	y	n	NA	NA	FALSE	TRUE	14	n	1955	NA	7
N	Anhui	1101	1101054	y	1	NA	1934	none	illit	none	none	TRUE	FALSE	y	y	y	1	n	n	y	n	y	n	NA	NA	FALSE	TRUE	NA	n	1954	NA	NA
N	Anhui	1101	1101055	y	1	NA	1926	none	illit	none	none	TRUE	FALSE	y	y	y	4	y	n	y	n	n	n	NA	NA	FALSE	TRUE	15	y	1945	TRUE	4
N	Anhui	1101	1101056	n	0	0	1938	none	illit	none	none	FALSE	FALSE	n	y	y	3	n	n	n	n	n	n	NA	NA	FALSE	FALSE	24	n	1959	NA	-3
N	Anhui	1101	1101057	n	0	0	1933	none	illit	none	none	TRUE	FALSE	y	y	y	3	y	n	y	n	y	n	NA	NA	FALSE	TRUE	15	n	1951	NA	3
N	Anhui	1101	1101058	y	1	NA	1918	none	NA	none	none	TRUE	FALSE	y	y	y	3	y	n	y	n	y	n	NA	NA	FALSE	TRUE	13	n	1936	TRUE	5
N	Anhui	1101	1101059	n	0	0	1937	some	half	none	none	TRUE	FALSE	y	y	y	4	y	n	y	n	y	n	NA	NA	FALSE	TRUE	12	y	1956	NA	7
N	Anhui	1101	1101060	y	1	1	1930	none	illit	none	none	NA	NA	y	y	y	1	y	n	n	n	NA	NA	NA	NA	FALSE	FALSE	15	n	1949	TRUE	4
N	Anhui	1101	1101061	y	1	1	1925	none	illit	none	none	TRUE	FALSE	n	y	y	1	y	n	y	n	y	n	NA	NA	FALSE	TRUE	15	n	NA	NA	NA
N	Anhui	1101	1101062	y	1	1	1933	none	illit	none	none	TRUE	FALSE	y	y	y	4	y	n	n	n	y	n	NA	NA	FALSE	TRUE	14	n	1953	TRUE	6
N	Anhui	1101	1101063	y	1	1	1925	none	illit	none	none	TRUE	FALSE	y	y	y	4	y	n	n	n	y	n	NA	NA	FALSE	TRUE	11	y	1949	TRUE	13
N	Anhui	1101	1101064	n	0	0	1938	none	illit	none	none	TRUE	FALSE	y	y	y	4	y	n	y	n	y	n	NA	NA	FALSE	TRUE	14	n	1959	NA	7
N	Anhui	1101	1101065	y	1	1	1932	none	illit	none	none	TRUE	FALSE	n	y	y	4	y	n	n	n	y	n	NA	NA	FALSE	TRUE	14	n	1953	TRUE	7
N	Anhui	1101	1101066	y	1	NA	1928	none	illit	none	none	NA	NA	n	y	y	4	n	n	n	n	NA	NA	NA	NA	FALSE	FALSE	NA	y	1947	TRUE	NA
N	Anhui	1101	1101067	n	0	0	1918	none	illit	none	none	TRUE	FALSE	y	y	y	3	y	n	n	n	n	n	NA	NA	FALSE	FALSE	16	y	1937	NA	3
N	Anhui	1101	1101068	y	1	NA	1923	none	illit	none	none	TRUE	FALSE	y	y	y	3	y	n	n	n	n	n	NA	NA	FALSE	FALSE	12	n	1943	TRUE	8
N	Anhui	1101	1101069	n	0	0	1930	some	lit	none	NA	NA	NA	n	y	y	4	y	n	y	n	NA	NA	NA	NA	FALSE	TRUE	14	y	1951	NA	7
N	Anhui	1101	1101070	n	0	0	1935	some	illit	none	none	TRUE	FALSE	y	y	y	3	y	n	n	n	n	n	NA	NA	FALSE	FALSE	14.5	n	1955	NA	5.5
N	Anhui	1101	1101071	n	0	0	1942	none	illit	none	none	TRUE	FALSE	y	y	y	4	y	n	n	n	n	n	NA	NA	FALSE	FALSE	15	y	1962	NA	5
N	Anhui	1101	1101072	n	0	0	1942	some	half	none	none	FALSE	FALSE	y	y	y	4	n	n	n	n	n	n	NA	NA	FALSE	FALSE	NA	n	1962	NA	NA
N	Anhui	1101	1101073	y	1	1	1925	some	half	none	none	TRUE	FALSE	y	y	y	3	y	n	y	n	n	n	NA	NA	FALSE	TRUE	11	y	1945	TRUE	9
N	Anhui	1101	1101074	y	1	NA	1930	none	illit	none	none	FALSE	FALSE	y	y	y	0	n	n	n	n	n	n	NA	NA	FALSE	FALSE	NA	y	1950	TRUE	NA
N	Anhui	1101	1101075	y	1	NA	1928	none	illit	some	some	TRUE	FALSE	y	y	NA	4	y	n	n	n	n	n	NA	NA	FALSE	FALSE	13	y	1948	TRUE	7
N	Anhui	1101	1101076	y	1	1	1934	none	illit	none	none	FALSE	FALSE	y	y	y	4	n	n	n	n	n	n	NA	NA	FALSE	FALSE	12	n	1943	TRUE	-3
N	Anhui	1101	1101077	y	1	NA	1929	none	illit	none	none	FALSE	FALSE	y	y	y	3	n	n	n	n	n	n	NA	NA	FALSE	FALSE	20.5	n	1947	TRUE	-2.5
N	Anhui	1101	1101078	y	1	1	1929	none	illit	none	none	FALSE	FALSE	y	y	y	3	n	n	n	n	n	n	NA	NA	FALSE	FALSE	NA	y	1949	TRUE	NA
N	Anhui	1101	1101079	y	1	NA	1926	none	illit	none	none	TRUE	FALSE	y	y	y	4	y	n	n	n	n	n	NA	NA	FALSE	FALSE	18	n	1947	TRUE	3
N	Anhui	1101	1101080	y	1	NA	1923	none	illit	none	none	FALSE	FALSE	y	y	y	3	n	n	n	n	n	n	NA	NA	FALSE	FALSE	NA	n	1940	TRUE	NA
N	Anhui	1101	1101081	y	1	1	1924	none	illit	none	none	TRUE	FALSE	y	y	y	4	y	n	n	n	n	n	NA	NA	FALSE	FALSE	12	n	1944	TRUE	8
N	Anhui	1101	1101082	n	0	0	1938	none	illit	none	none	TRUE	TRUE	y	y	y	3	y	n	n	y	n	n	NA	NA	TRUE	FALSE	12.5	y	1958	NA	7.5
N	Anhui	1101	1101083	y	1	1	1919	some	half	none	some	TRUE	FALSE	y	y	y	3	y	n	n	n	n	n	NA	NA	FALSE	FALSE	17	n	1940	TRUE	4
N	Anhui	1101	1101084	n	0	0	1933	none	lit	none	none	TRUE	FALSE	y	y	y	4	y	n	y	n	n	n	NA	NA	FALSE	TRUE	12	n	1955	NA	10
N	Anhui	1101	1101085	y	1	1	1925	none	illit	none	none	TRUE	FALSE	y	y	y	3	y	n	n	n	n	n	NA	NA	FALSE	FALSE	16	y	1944	TRUE	3
N	Anhui	1101	1101086	n	0	0	1934	none	illit	none	none	TRUE	FALSE	y	y	y	4	y	n	n	n	n	n	NA	NA	FALSE	FALSE	17	y	1952	NA	1
N	Anhui	1101	1101087	y	1	NA	1934	none	half	none	none	TRUE	FALSE	y	y	y	3	y	n	n	n	n	n	NA	NA	FALSE	FALSE	16	y	1955	TRUE	5
N	Anhui	1101	1101088	n	0	0	1931	none	illit	none	none	TRUE	FALSE	y	y	y	1	y	n	n	n	n	n	NA	NA	FALSE	FALSE	12	n	1950	NA	7
N	Anhui	1101	1101089	n	0	0	1932	some	lit	none	NA	FALSE	FALSE	y	y	y	4	n	n	n	n	n	n	NA	NA	FALSE	FALSE	NA	y	1951	NA	NA
N	Anhui	1101	1101091	y	1	1	1929	none	illit	none	none	TRUE	FALSE	y	y	y	3	y	n	n	n	n	n	NA	NA	FALSE	FALSE	14	y	1946	TRUE	3
N	Anhui	1101	1101092	y	1	NA	1930	none	illit	none	some	TRUE	FALSE	y	y	y	4	y	n	y	n	n	n	NA	NA	FALSE	TRUE	12.5	y	1947	NA	4.5
N	Anhui	1101	1101093	n	0	0	1925	none	illit	none	none	FALSE	FALSE	y	y	y	1	n	n	n	n	n	n	NA	NA	FALSE	FALSE	14	n	1939	NA	0
N	Anhui	1101	1101094	y	1	1	1929	none	illit	none	none	TRUE	FALSE	y	y	y	3	y	n	n	n	n	n	NA	NA	FALSE	FALSE	10	n	1949	TRUE	10
N	Anhui	1101	1101095	n	0	0	1938	some	half	none	none	TRUE	FALSE	y	y	y	4	y	n	n	n	n	n	NA	NA	FALSE	FALSE	12.5	y	1957	NA	6.5
N	Anhui	1101	1101096	y	1	NA	1931	none	illit	none	none	TRUE	FALSE	y	y	y	1	y	n	n	n	n	n	NA	NA	FALSE	FALSE	12	y	1948	TRUE	5
N	Anhui	1101	1101097	n	0	0	1931	none	illit	none	none	NA	NA	n	y	y	3	y	n	n	n	NA	NA	NA	NA	FALSE	FALSE	17	n	1951	NA	3
N	Anhui	1101	1101098	n	0	0	1932	none	illit	none	none	TRUE	FALSE	y	y	y	3	y	n	n	n	n	n	NA	NA	FALSE	FALSE	12	y	1950	NA	6
N	Anhui	1101	1101099	n	0	0	1933	none	illit	none	none	TRUE	FALSE	y	y	y	3	y	n	n	n	n	n	NA	NA	FALSE	FALSE	17	n	1951	NA	1
N	Anhui	1101	1101100	y	1	1	1932	some	half	none	NA	NA	NA	n	y	y	4	n	n	n	n	NA	NA	NA	NA	FALSE	FALSE	NA	y	1952	TRUE	NA
N	Anhui	1102	1102001	n	0	0	1941	none	illit	none	none	FALSE	FALSE	y	y	y	2	n	n	n	n	n	n	NA	NA	FALSE	FALSE	20	n	1961	NA	0
N	Anhui	1102	1102002	y	1	NA	1930	none	illit	none	none	TRUE	FALSE	n	y	y	4	n	n	n	n	y	n	NA	NA	FALSE	TRUE	20	n	1949	TRUE	-1
N	Anhui	1102	1102003	n	0	0	1926	none	illit	none	none	TRUE	TRUE	y	y	y	2	y	y	n	n	n	n	NA	0.5	FALSE	FALSE	NA	n	1945	NA	-1
N	Anhui	1102	1102004	y	1	1	1926	none	illit	none	none	TRUE	FALSE	y	y	n	1	y	n	n	n	y	n	NA	NA	FALSE	TRUE	14	y	1947	TRUE	7
N	Anhui	1102	1102008	n	0	0	1937	none	illit	none	none	TRUE	TRUE	y	y	y	4	y	y	n	n	n	n	NA	NA	FALSE	FALSE	11	NA	1953	NA	5
N	Anhui	1102	1102009	y	1	NA	1934	none	illit	none	none	TRUE	NA	n	n	n	1	y	NA	n	n	n	n	NA	NA	FALSE	FALSE	12.5	n	1952	TRUE	5.5
N	Anhui	1102	1102010	n	0	0	1930	none	illit	NA	NA	FALSE	FALSE	n	NA	n	0	n	n	n	n	n	n	NA	NA	FALSE	FALSE	5.5	n	1947	NA	11.5
N	Anhui	1102	1102011	n	0	0	1923	none	illit	none	none	TRUE	TRUE	y	NA	y	3	n	y	n	n	y	n	NA	0.5	FALSE	TRUE	17.5	n	1943	NA	2.5
N	Anhui	1102	1102012	y	1	1	1917	none	illit	none	none	NA	NA	y	y	y	1	y	NA	NA	NA	y	n	NA	NA	FALSE	TRUE	8.5	n	1936	TRUE	10.5
N	Anhui	1102	1102015	y	1	NA	1941	some	half	none	none	TRUE	TRUE	y	n	n	2	y	y	n	y	n	n	NA	NA	TRUE	FALSE	15.5	y	1958	NA	1.5
N	Anhui	1102	1102016	y	1	NA	1921	none	illit	NA	NA	FALSE	FALSE	NA	n	y	NA	n	n	n	n	n	n	NA	NA	FALSE	FALSE	11	NA	1940	TRUE	8
N	Anhui	1102	1102017	y	1	NA	1923	none	illit	none	some	FALSE	FALSE	y	n	n	3	n	n	n	n	n	n	NA	NA	FALSE	FALSE	12	n	1942	TRUE	7
N	Anhui	1102	1102018	n	0	0	1934	none	illit	none	none	TRUE	NA	y	n	y	3	y	NA	n	n	n	n	NA	NA	FALSE	FALSE	6.5	n	1951	NA	10.5
N	Anhui	1102	1102019	y	1	1	1920	none	illit	none	none	TRUE	NA	NA	y	y	0	y	NA	n	n	n	y	NA	NA	TRUE	FALSE	12	n	1939	TRUE	7
N	Anhui	1102	1102021	NA	NA	NA	1942	some	lit	none	none	NA	NA	NA	NA	NA	NA	NA	NA	NA	NA	NA	NA	NA	NA	FALSE	FALSE	NA	NA	NA	NA	NA
N	Anhui	1102	1102023	y	1	1	1928	none	illit	none	none	FALSE	TRUE	y	y	y	0	n	y	n	n	n	n	NA	NA	FALSE	FALSE	12	n	1946	TRUE	6
N	Anhui	1102	1102024	y	1	1	1925	none	illit	none	none	TRUE	TRUE	n	y	y	4	y	n	n	n	y	y	NA	NA	TRUE	TRUE	20	y	1944	TRUE	-1
N	Anhui	1102	1102025	y	1	1	1933	none	illit	none	none	TRUE	TRUE	n	y	y	0	y	y	n	n	y	n	NA	NA	FALSE	TRUE	11	n	1950	TRUE	6
N	Anhui	1102	1102027	y	1	NA	1942	some	lit	none	none	NA	NA	y	y	y	3	y	n	y	n	NA	NA	NA	NA	FALSE	TRUE	19	y	1961	TRUE	0
N	Anhui	1102	1102028	n	0	0	1936	none	illit	none	none	FALSE	FALSE	y	NA	n	1	n	n	n	n	n	n	NA	NA	FALSE	FALSE	20	n	1956	NA	0
N	Anhui	1102	1102029	n	0	0	1941	none	illit	none	none	TRUE	TRUE	n	y	NA	4	y	y	n	n	n	n	NA	0.5	FALSE	FALSE	12.5	y	1957	NA	3.5
N	Anhui	1102	1102030	y	1	1	1933	none	illit	none	none	NA	NA	y	y	n	3	y	y	n	n	NA	NA	NA	0.5	FALSE	FALSE	19	n	1953	TRUE	1
N	Anhui	1102	1102031	n	0	0	1938	none	illit	none	none	FALSE	FALSE	y	y	n	4	n	n	n	n	n	n	NA	NA	FALSE	FALSE	14	n	1957	NA	5
N	Anhui	1102	1102032	n	0	0	1941	some	lit	none	none	FALSE	FALSE	y	y	NA	1	n	n	n	n	n	n	NA	NA	FALSE	FALSE	NA	n	1965	NA	NA
N	Anhui	1102	1102036	y	1	1	1934	none	illit	none	none	TRUE	TRUE	n	y	n	4	y	y	n	n	n	y	NA	NA	TRUE	FALSE	7.5	n	1951	TRUE	9.5
N	Anhui	1102	1102037	y	1	1	1921	none	illit	none	none	TRUE	NA	n	n	y	4	y	n	n	n	y	NA	NA	NA	FALSE	TRUE	12.5	y	1938	TRUE	4.5
N	Anhui	1102	1102039	n	0	0	1937	none	illit	none	none	TRUE	TRUE	y	y	y	4	y	y	n	n	y	n	NA	NA	FALSE	TRUE	13.5	y	1954	NA	3.5
N	Anhui	1102	1102040	y	1	1	1915	none	illit	none	NA	TRUE	FALSE	y	y	y	2	y	n	n	n	y	n	NA	NA	FALSE	TRUE	20	n	1934	TRUE	-1
N	Anhui	1102	1102041	y	1	NA	1928	none	illit	none	none	TRUE	TRUE	n	y	y	1	y	y	n	n	y	n	NA	NA	FALSE	TRUE	20	n	1947	NA	-1
N	Anhui	1102	1102042	n	0	0	1942	none	illit	none	none	TRUE	TRUE	y	y	y	2	n	n	n	n	y	y	NA	NA	TRUE	TRUE	NA	n	1960	NA	NA
N	Anhui	1102	1102043	n	0	0	1937	none	illit	NA	NA	TRUE	NA	n	n	NA	4	y	NA	n	n	y	n	NA	NA	FALSE	TRUE	10	n	1955	NA	8
N	Anhui	1102	1102044	n	0	0	1933	none	illit	NA	none	FALSE	TRUE	n	y	y	0	n	n	n	n	n	y	NA	NA	TRUE	FALSE	17	n	1950	NA	0
N	Anhui	1102	1102045	y	1	1	1918	none	illit	none	NA	NA	NA	y	y	n	1	y	NA	y	y	NA	y	NA	0.25	TRUE	TRUE	11	y	1936	TRUE	7
N	Anhui	1102	1102046	y	1	1	1930	none	illit	none	NA	TRUE	TRUE	y	y	NA	4	y	y	n	n	y	n	NA	NA	FALSE	TRUE	15.6	n	1949	TRUE	3.4
N	Anhui	1102	1102047	n	0	0	1934	none	illit	none	none	FALSE	FALSE	n	y	n	2	n	n	n	n	n	n	NA	NA	FALSE	FALSE	NA	n	1952	NA	NA
N	Anhui	1102	1102048	y	1	NA	1925	none	illit	none	none	TRUE	TRUE	n	y	n	0	y	y	n	n	y	n	NA	0.5	FALSE	TRUE	13.5	n	1942	TRUE	3.5
N	Anhui	1102	1102049	y	1	1	1924	none	illit	none	none	TRUE	FALSE	y	NA	n	1	y	n	n	n	y	n	NA	NA	FALSE	TRUE	8	y	1943	TRUE	11
N	Anhui	1102	1102050	n	0	0	1934	none	illit	none	none	TRUE	FALSE	y	y	y	3	n	n	n	n	y	n	NA	NA	FALSE	TRUE	NA	n	1953	NA	NA
N	Anhui	1102	1102051	y	1	NA	1935	none	illit	some	some	TRUE	TRUE	y	y	n	1	n	y	n	n	y	n	NA	NA	FALSE	TRUE	12.5	n	1955	TRUE	7.5
N	Anhui	1102	1102052	y	1	NA	1926	none	illit	none	none	TRUE	FALSE	y	y	y	NA	y	n	n	n	n	n	NA	0.25	FALSE	FALSE	10	n	1941	TRUE	5
N	Anhui	1102	1102053	n	0	0	1926	none	illit	none	none	TRUE	FALSE	y	y	n	1	y	n	n	n	y	n	NA	NA	FALSE	TRUE	NA	y	1944	NA	NA
N	Anhui	1102	1102054	y	1	NA	1926	none	half	none	none	TRUE	FALSE	y	NA	n	0	y	n	n	n	y	n	NA	NA	FALSE	TRUE	11.5	n	1942	TRUE	4.5
N	Anhui	1102	1102055	n	0	0	1930	none	illit	none	none	FALSE	FALSE	n	y	y	1	n	n	n	n	n	n	NA	NA	FALSE	FALSE	15	n	1949	NA	4
N	Anhui	1102	1102056	n	0	0	1931	none	illit	none	NA	TRUE	NA	y	y	y	4	y	NA	n	n	y	n	NA	NA	FALSE	TRUE	11.5	y	1952	NA	9.5
N	Anhui	1102	1102057	y	1	NA	1923	none	illit	none	NA	TRUE	TRUE	y	y	y	1	y	y	y	y	y	n	NA	NA	TRUE	TRUE	16	y	1940	TRUE	1
N	Anhui	1102	1102058	NA	NA	NA	1933	none	illit	none	none	NA	NA	NA	NA	NA	1	n	n	n	n	NA	NA	NA	NA	FALSE	FALSE	NA	n	1954	NA	NA
N	Anhui	1102	1102059	y	1	1	1930	none	illit	none	none	TRUE	FALSE	y	y	y	4	y	n	y	n	y	n	NA	NA	FALSE	TRUE	8.5	y	1947	TRUE	8.5
N	Anhui	1102	1102060	y	1	1	1936	none	illit	none	none	TRUE	TRUE	y	y	y	2	y	y	n	n	y	n	NA	NA	FALSE	TRUE	13	n	1953	TRUE	4
N	Anhui	1102	1102061	y	1	1	1926	none	illit	none	none	NA	NA	n	y	y	0	NA	NA	n	n	NA	NA	NA	NA	FALSE	FALSE	17	n	1943	TRUE	0
N	Anhui	1102	1102062	n	0	0	1933	none	illit	none	none	NA	NA	y	y	y	NA	n	y	n	n	NA	NA	NA	NA	FALSE	FALSE	13.5	n	1951	NA	4.5
N	Anhui	1102	1102063	n	0	0	1921	none	illit	NA	NA	NA	NA	NA	y	y	NA	NA	NA	n	n	NA	NA	NA	NA	FALSE	FALSE	9	NA	1939	NA	9
N	Anhui	1102	1102064	n	0	0	1921	none	illit	none	none	FALSE	FALSE	y	y	y	0	n	n	n	n	n	n	NA	NA	FALSE	FALSE	NA	n	1938	NA	NA
N	Anhui	1102	1102065	n	0	0	1924	none	illit	none	none	TRUE	FALSE	NA	y	y	1	n	n	n	n	y	n	NA	NA	FALSE	TRUE	19	y	1943	NA	0
N	Anhui	1102	1102066	n	0	0	1929	none	illit	none	none	TRUE	TRUE	y	y	y	2	y	y	n	y	y	n	NA	0.5	TRUE	TRUE	18	y	1948	NA	1
N	Anhui	1102	1102067	y	1	1	1922	none	illit	none	none	TRUE	FALSE	n	y	y	NA	n	n	n	n	y	n	NA	NA	FALSE	TRUE	19	n	1941	TRUE	0
N	Anhui	1102	1102068	y	1	1	1919	none	illit	none	none	TRUE	FALSE	y	y	y	0	y	n	n	n	y	n	NA	NA	FALSE	TRUE	16	n	1937	TRUE	2
N	Anhui	1102	1102069	y	1	1	1929	none	half	none	none	TRUE	FALSE	NA	y	y	1	y	n	n	n	y	n	NA	NA	FALSE	TRUE	12.5	y	1947	TRUE	5.5
N	Anhui	1102	1102070	n	0	0	1934	none	lit	none	none	FALSE	FALSE	y	y	n	0	n	n	n	n	n	n	NA	NA	FALSE	FALSE	NA	n	1958	NA	NA
N	Anhui	1102	1102071	y	1	1	1933	none	illit	none	none	FALSE	TRUE	y	y	n	2	n	n	n	n	n	y	NA	NA	TRUE	FALSE	16	n	1950	TRUE	1
N	Anhui	1102	1102072	y	1	1	1920	none	illit	none	none	NA	TRUE	n	y	y	3	NA	y	n	n	n	y	NA	0.5	TRUE	FALSE	12	n	1943	TRUE	11
N	Anhui	1102	1102073	n	0	0	1933	none	illit	none	none	TRUE	TRUE	n	NA	y	1	n	y	n	n	y	n	NA	NA	FALSE	TRUE	12.5	n	1952	NA	6.5
N	Anhui	1102	1102074	n	0	0	1933	none	illit	none	none	TRUE	TRUE	y	y	y	0	y	y	n	n	n	n	NA	NA	FALSE	FALSE	14	n	1950	NA	3
N	Anhui	1102	1102075	y	1	1	1930	none	illit	none	none	TRUE	FALSE	y	y	y	0	n	n	n	n	y	n	NA	NA	FALSE	TRUE	12	n	1950	TRUE	8
N	Anhui	1102	1102076	n	0	0	1932	none	illit	none	none	TRUE	FALSE	n	y	y	0	y	n	n	n	n	n	NA	NA	FALSE	FALSE	18	n	1952	NA	2
N	Anhui	1102	1102077	y	1	NA	1926	none	illit	none	none	TRUE	TRUE	y	y	y	0	n	y	n	n	y	n	NA	NA	FALSE	TRUE	12.5	n	1945	NA	6.5
N	Anhui	1102	1102078	y	1	1	1929	none	illit	none	none	TRUE	FALSE	n	y	y	3	y	n	n	n	n	n	NA	NA	FALSE	FALSE	12	n	1948	TRUE	7
N	Anhui	1102	1102079	n	0	0	1928	none	illit	none	none	TRUE	FALSE	y	y	y	2	y	n	n	n	y	n	NA	NA	FALSE	TRUE	16	y	1948	NA	4
N	Anhui	1102	1102080	n	0	0	1926	none	illit	none	none	TRUE	FALSE	y	NA	n	3	y	n	n	n	y	n	NA	NA	FALSE	TRUE	16.5	n	1944	NA	1.5
N	Anhui	1102	1102081	y	1	NA	1929	none	illit	none	none	TRUE	FALSE	y	y	y	0	y	n	n	n	y	n	NA	NA	FALSE	TRUE	12	n	1949	TRUE	8
N	Anhui	1102	1102082	n	0	0	1936	none	illit	none	none	FALSE	FALSE	y	y	y	2	n	n	n	n	n	n	NA	NA	FALSE	FALSE	12.5	n	1954	NA	5.5
N	Anhui	1102	1102083	y	1	1	1926	none	illit	none	none	TRUE	TRUE	y	y	y	1	y	n	y	y	y	n	NA	NA	TRUE	TRUE	10	y	1944	TRUE	8
N	Anhui	1102	1102084	n	0	0	1939	none	illit	none	none	TRUE	FALSE	y	y	y	2	n	n	n	n	y	n	NA	NA	FALSE	TRUE	NA	n	1958	NA	NA
N	Anhui	1102	1102087	n	0	0	1932	none	illit	none	none	TRUE	FALSE	y	y	y	2	y	n	n	n	y	n	NA	NA	FALSE	TRUE	13	n	1950	NA	5
N	Anhui	1102	1102088	n	0	0	1932	none	illit	none	none	TRUE	FALSE	y	y	y	1	y	n	n	n	y	n	NA	NA	FALSE	TRUE	11	n	1948	NA	5
N	Anhui	1102	1102090	n	0	0	1942	none	illit	none	NA	TRUE	TRUE	y	y	y	0	y	y	n	n	n	n	NA	NA	FALSE	FALSE	8	n	1960	NA	10
N	Anhui	1102	1102092	y	1	NA	1929	none	illit	none	NA	TRUE	TRUE	n	y	n	4	y	y	n	n	y	n	NA	NA	FALSE	TRUE	16	n	1948	NA	3
N	Anhui	1102	1102093	n	0	0	1930	none	illit	NA	none	TRUE	TRUE	y	y	y	2	y	y	n	n	y	n	NA	NA	FALSE	TRUE	17	n	1948	NA	1
N	Anhui	1102	1102094	y	1	NA	1930	none	half	none	NA	FALSE	FALSE	n	y	y	NA	n	n	n	n	n	n	NA	NA	FALSE	FALSE	8.5	y	1947	TRUE	8.5
N	Anhui	1102	1102095	y	1	1	1929	none	illit	none	none	TRUE	FALSE	n	y	n	0	y	n	n	n	n	n	NA	NA	FALSE	FALSE	8	n	1951	TRUE	14
N	Anhui	1102	1102096	y	1	NA	1917	none	illit	none	none	TRUE	FALSE	y	y	y	1	y	n	n	n	y	n	NA	NA	FALSE	TRUE	12.5	n	1936	TRUE	6.5
N	Anhui	1102	1102097	n	0	0	1930	none	half	none	NA	TRUE	FALSE	n	y	y	1	n	n	n	n	y	n	NA	NA	FALSE	TRUE	NA	n	1952	NA	NA
N	Anhui	1102	1102098	n	0	0	1927	none	illit	NA	NA	NA	NA	NA	NA	n	NA	NA	NA	NA	NA	NA	NA	NA	NA	FALSE	FALSE	NA	NA	NA	NA	NA
N	Anhui	1102	1102099	y	1	1	1923	none	illit	none	none	FALSE	TRUE	y	y	n	0	n	y	n	n	n	n	NA	NA	FALSE	FALSE	14.5	n	1940	TRUE	2.5
N	Anhui	1102	1102100	y	1	1	1928	none	illit	none	none	TRUE	FALSE	n	y	n	0	y	n	n	n	n	n	NA	NA	FALSE	FALSE	10	n	1947	TRUE	9
SW	Guizhou	1501	1501001	n	0	0	1937	none	illit	none	none	TRUE	FALSE	y	n	y	4	y	n	n	n	y	n	NA	NA	FALSE	TRUE	12	n	1957	NA	8
SW	Guizhou	1501	1501003	n	0	0	1935	none	illit	none	NA	TRUE	FALSE	y	n	n	4	n	n	n	n	y	n	NA	NA	FALSE	TRUE	NA	n	1952	NA	NA
SW	Guizhou	1501	1501005	n	0	0	1931	none	illit	none	none	NA	NA	y	n	y	0	n	n	n	n	NA	NA	NA	NA	FALSE	FALSE	NA	n	1948	NA	NA
SW	Guizhou	1501	1501006	y	1	NA	1929	none	illit	none	none	FALSE	FALSE	y	y	y	3	n	n	n	n	n	n	NA	NA	FALSE	FALSE	NA	y	1946	TRUE	NA
SW	Guizhou	1501	1501007	n	0	0	1926	none	illit	none	none	FALSE	FALSE	NA	NA	n	3	n	n	n	n	n	n	NA	NA	FALSE	FALSE	NA	n	1944	NA	NA
SW	Guizhou	1501	1501008	n	0	0	1935	none	illit	none	none	TRUE	FALSE	NA	y	n	3	n	n	n	n	y	n	NA	NA	FALSE	TRUE	NA	n	1953	NA	NA
SW	Guizhou	1501	1501009	n	0	0	1930	none	illit	none	none	TRUE	FALSE	y	n	n	1	y	n	y	n	y	n	NA	0.03	FALSE	TRUE	NA	y	1948	NA	NA
SW	Guizhou	1501	1501010	y	1	NA	1932	none	illit	none	none	TRUE	TRUE	y	y	n	4	y	y	n	n	y	n	NA	0.17	FALSE	TRUE	NA	n	1949	TRUE	NA
SW	Guizhou	1501	1501018	n	0	0	1930	none	illit	none	none	FALSE	FALSE	n	y	y	3	n	n	n	n	n	n	NA	NA	FALSE	FALSE	11.5	n	1945.5	NA	4
SW	Guizhou	1501	1501020	y	1	1	1921	none	illit	none	some	TRUE	NA	y	y	n	4	y	y	n	y	y	NA	NA	0.22	TRUE	TRUE	10	y	1938	TRUE	7
SW	Guizhou	1501	1501021	y	1	1	1938	none	illit	none	none	TRUE	FALSE	y	y	y	4	n	n	n	n	y	n	NA	NA	FALSE	TRUE	NA	n	1956	TRUE	NA
SW	Guizhou	1501	1501022	y	1	1	1924	none	illit	none	none	NA	NA	y	y	y	4	NA	y	NA	NA	y	y	NA	0.17	TRUE	TRUE	NA	y	1941	TRUE	NA
SW	Guizhou	1501	1501023	y	1	NA	1922	none	illit	none	none	TRUE	TRUE	NA	y	NA	NA	n	n	n	n	y	y	NA	NA	TRUE	TRUE	NA	n	1943	TRUE	NA
SW	Guizhou	1501	1501025	y	1	NA	1933	none	illit	none	none	FALSE	TRUE	y	y	n	4	n	y	n	n	n	n	NA	0.21	FALSE	FALSE	18	n	1953	TRUE	2
SW	Guizhou	1501	1501026	n	0	0	1936	none	illit	none	none	TRUE	TRUE	y	y	n	4	y	y	n	n	y	y	NA	0.25	TRUE	TRUE	12	y	1953	NA	5
SW	Guizhou	1501	1501027	n	0	0	1937	none	illit	none	none	TRUE	TRUE	y	y	n	3	y	n	n	y	y	n	NA	NA	TRUE	TRUE	14	n	1953	NA	2
SW	Guizhou	1501	1501028	n	0	0	1938	none	illit	none	none	NA	NA	y	n	n	4	NA	y	NA	NA	y	n	NA	0.17	FALSE	TRUE	NA	y	1956	NA	NA
SW	Guizhou	1501	1501029	y	1	NA	1927	none	illit	none	none	TRUE	TRUE	y	y	n	1	n	y	n	n	y	n	NA	0.25	FALSE	TRUE	14	n	1948	TRUE	7
SW	Guizhou	1501	1501032	y	1	1	1921	some	lit	NA	NA	TRUE	FALSE	n	y	y	4	n	n	n	n	y	n	NA	NA	FALSE	TRUE	NA	y	1940	TRUE	NA
SW	Guizhou	1501	1501037	n	0	0	1935	none	illit	none	none	NA	TRUE	y	y	y	1	NA	y	n	n	n	n	NA	0.17	FALSE	FALSE	14	n	1951	NA	2
SW	Guizhou	1501	1501038	y	1	1	1935	none	illit	none	some	NA	NA	y	y	y	3	NA	y	y	NA	y	n	NA	NA	FALSE	TRUE	NA	n	1950	TRUE	NA
SW	Guizhou	1501	1501039	y	1	1	1934	none	illit	none	none	NA	TRUE	y	y	n	3	NA	y	NA	y	n	y	NA	0.21	TRUE	FALSE	NA	y	1952	TRUE	NA
SW	Guizhou	1501	1501042	n	0	0	1937	none	illit	none	none	NA	NA	NA	y	y	1	NA	NA	n	y	n	y	NA	NA	TRUE	FALSE	8	y	1955	NA	10
SW	Guizhou	1501	1501043	n	0	0	1939	none	illit	none	none	NA	NA	y	y	n	1	NA	NA	n	y	y	y	NA	0.5	TRUE	TRUE	15	y	1957	NA	3
SW	Guizhou	1501	1501044	n	0	0	1932	none	illit	none	none	TRUE	FALSE	y	y	NA	1	n	n	n	n	y	n	NA	NA	FALSE	TRUE	NA	n	1953	NA	NA
SW	Guizhou	1501	1501046	y	1	1	1937	none	illit	none	NA	NA	TRUE	y	y	NA	1	NA	y	n	n	NA	y	NA	0.14	TRUE	FALSE	NA	y	1960	TRUE	NA
SW	Guizhou	1501	1501048	y	1	NA	1929	some	half	none	some	TRUE	NA	n	NA	n	4	y	NA	y	y	y	n	NA	0.31	TRUE	TRUE	13	y	1949	TRUE	7
SW	Guizhou	1501	1501052	y	1	1	1923	none	illit	none	none	TRUE	NA	y	y	n	4	y	n	y	y	y	NA	y	0.5	TRUE	TRUE	14	y	1939	TRUE	2
SW	Guizhou	1501	1501053	n	0	0	1939	none	illit	none	some	FALSE	TRUE	y	NA	y	1	n	y	n	n	n	n	NA	NA	FALSE	FALSE	NA	n	1957	NA	NA
SW	Guizhou	1501	1501054	y	1	NA	1933	none	illit	none	none	TRUE	TRUE	y	y	n	3	y	y	n	n	n	n	y	0.5	FALSE	FALSE	8	y	1950	TRUE	9
SW	Guizhou	1501	1501055	n	0	0	1939	some	lit	none	none	TRUE	TRUE	NA	NA	y	NA	n	y	n	n	y	n	NA	NA	FALSE	TRUE	11	y	1963	NA	13
SW	Guizhou	1501	1501075	n	0	0	1939	some	lit	none	none	FALSE	TRUE	n	n	n	1	n	n	n	y	n	y	NA	NA	TRUE	FALSE	NA	n	1958	NA	NA
SW	Guizhou	1501	1501076	n	0	0	1940	none	illit	none	none	NA	NA	y	n	n	4	NA	NA	n	n	n	n	NA	NA	FALSE	FALSE	16	n	1956	NA	0
SW	Guizhou	1501	1501079	y	1	NA	1921	none	illit	none	none	FALSE	TRUE	n	y	y	1	n	n	n	n	n	y	NA	NA	TRUE	FALSE	20	n	1939	NA	-2
SW	Guizhou	1501	1501080	n	0	0	1938	none	illit	none	none	TRUE	TRUE	NA	y	n	4	n	n	n	n	y	y	NA	NA	TRUE	TRUE	NA	n	1961	NA	NA
SW	Guizhou	1501	1501084	y	1	NA	1928	none	illit	none	none	TRUE	TRUE	n	n	n	1	y	y	n	n	n	n	NA	NA	FALSE	FALSE	11	n	1946	TRUE	7
SW	Guizhou	1501	1501087	n	0	0	1927	none	illit	none	none	TRUE	TRUE	n	y	n	1	y	n	n	y	n	n	NA	NA	TRUE	FALSE	11	y	1951	NA	13
SW	Guizhou	1501	1501088	n	0	0	1938	none	illit	none	none	TRUE	TRUE	NA	n	n	2	n	y	n	n	y	y	NA	NA	TRUE	TRUE	7.5	y	1956	NA	10.5
SW	Guizhou	1501	1501090	y	1	1	1929	none	illit	none	some	TRUE	FALSE	y	y	n	4	n	n	n	n	y	n	NA	NA	FALSE	TRUE	NA	n	1947	TRUE	NA
SW	Guizhou	1501	1501091	y	1	1	1930	none	illit	none	none	TRUE	FALSE	n	n	n	NA	n	n	n	n	y	n	NA	NA	FALSE	TRUE	6.5	y	1950	TRUE	13.5
SW	Guizhou	1501	1501102	n	0	0	1933	none	illit	none	none	FALSE	FALSE	NA	n	n	1	n	n	n	n	n	n	NA	NA	FALSE	FALSE	NA	n	1950	NA	NA
SW	Guizhou	1501	1501103	n	0	0	1936	some	lit	none	some	NA	NA	y	y	y	3	NA	NA	n	n	y	y	NA	NA	TRUE	TRUE	12	n	1953	NA	5
SW	Guizhou	1501	1501104	n	0	0	1933	none	illit	none	none	TRUE	FALSE	y	n	n	4	n	n	n	n	y	n	NA	NA	FALSE	TRUE	NA	n	1950	NA	NA
SW	Guizhou	1501	1501105	n	0	0	1933	none	illit	none	some	FALSE	TRUE	y	n	y	3	n	n	n	n	n	y	NA	NA	TRUE	FALSE	NA	n	NA	NA	NA
SW	Guizhou	1501	1501106	n	0	0	1929	none	illit	none	none	NA	NA	y	n	y	3	n	n	n	n	NA	NA	NA	NA	FALSE	FALSE	NA	n	1944	NA	NA
SW	Guizhou	1501	1501107	n	0	0	1934	none	illit	none	none	FALSE	FALSE	y	n	n	3	n	n	n	n	n	n	NA	NA	FALSE	FALSE	NA	n	1951	NA	NA
SW	Guizhou	1501	1501109	n	0	0	1932	some	half	some	some	TRUE	TRUE	y	y	n	4	n	n	y	n	y	y	NA	NA	TRUE	TRUE	NA	y	1957	NA	NA
SW	Guizhou	1501	1501110	n	0	0	1939	none	illit	none	none	TRUE	FALSE	y	n	y	4	n	n	n	n	y	n	NA	NA	FALSE	TRUE	NA	n	1956	NA	NA
SW	Guizhou	1501	1501111	n	0	0	1934	none	illit	none	none	TRUE	TRUE	y	n	NA	2	n	n	n	n	y	y	NA	NA	TRUE	TRUE	NA	n	1954	NA	NA
SW	Guizhou	1501	1501114	n	0	0	1929	none	illit	none	none	FALSE	TRUE	y	y	n	4	n	n	n	n	n	y	NA	NA	TRUE	FALSE	NA	n	1947	NA	NA
SW	Guizhou	1501	1501115	n	0	0	1928	none	illit	none	none	FALSE	FALSE	y	n	y	NA	n	n	n	n	n	n	NA	NA	FALSE	FALSE	NA	n	1946	NA	NA
SW	Guizhou	1501	1501116	NA	NA	NA	1938	some	illit	none	NA	TRUE	TRUE	y	NA	n	4	y	n	n	n	y	y	NA	NA	TRUE	TRUE	11	n	1956	NA	7
SW	Guizhou	1501	1501117	NA	NA	NA	1933	none	illit	none	none	TRUE	NA	y	y	y	3	y	NA	n	n	y	y	NA	NA	TRUE	TRUE	NA	n	1950	NA	NA
SW	Guizhou	1501	1501118	n	0	0	1925	none	illit	none	NA	TRUE	TRUE	y	n	n	4	y	n	n	n	y	y	NA	NA	TRUE	TRUE	14	n	1945	NA	6
SW	Guizhou	1501	1501119	n	0	0	1939	none	illit	none	none	TRUE	TRUE	y	y	y	3	n	n	n	n	y	y	NA	NA	TRUE	TRUE	NA	n	1960	NA	NA
SW	Guizhou	1501	1501120	n	0	0	1932	none	illit	none	none	TRUE	TRUE	y	NA	n	3	n	n	n	n	y	y	NA	NA	TRUE	TRUE	NA	n	1950	NA	NA
SW	Guizhou	1501	1501121	n	0	0	1935	none	illit	none	NA	FALSE	FALSE	y	NA	n	3	n	n	n	n	n	n	NA	NA	FALSE	FALSE	NA	n	1956	NA	NA
SW	Guizhou	1501	1501122	n	0	0	1934	none	illit	none	none	TRUE	FALSE	y	NA	y	1	n	n	n	n	y	n	NA	NA	FALSE	TRUE	NA	n	1952	NA	NA
SW	Guizhou	1501	1501123	n	0	0	1935	none	illit	none	none	FALSE	TRUE	y	y	y	4	n	n	n	n	n	y	NA	NA	TRUE	FALSE	NA	n	1954	NA	NA
SW	Guizhou	1501	1501124	n	0	0	1939	none	illit	none	none	TRUE	FALSE	y	n	n	NA	n	n	n	n	y	n	NA	NA	FALSE	TRUE	NA	n	1955	NA	NA
SW	Guizhou	1501	1501125	n	0	0	1938	none	illit	none	none	TRUE	NA	y	n	n	NA	n	n	n	n	y	NA	NA	NA	FALSE	TRUE	NA	n	1955	NA	NA
SW	Guizhou	1501	1501126	n	0	0	1935	none	illit	none	none	TRUE	FALSE	y	n	n	4	n	n	n	n	y	n	NA	NA	FALSE	TRUE	NA	n	1956	NA	NA
SW	Guizhou	1501	1501127	n	0	0	1933	none	illit	none	none	NA	NA	NA	n	n	3	n	n	n	n	NA	NA	NA	NA	FALSE	FALSE	NA	n	1950	NA	NA
SW	Guizhou	1501	1501128	y	1	NA	1931	none	illit	none	none	TRUE	NA	y	y	n	NA	n	n	n	n	y	NA	NA	NA	FALSE	TRUE	NA	n	1948	TRUE	NA
SW	Guizhou	1501	1501129	y	1	NA	1932	none	illit	none	none	TRUE	NA	y	y	n	4	n	n	n	n	y	NA	y	NA	FALSE	TRUE	NA	n	1952	TRUE	NA
SW	Guizhou	1501	1501131	y	1	NA	1939	none	illit	NA	NA	TRUE	NA	y	y	n	4	n	n	n	n	y	NA	NA	NA	FALSE	TRUE	NA	n	1955	NA	NA
SW	Guizhou	1501	1501132	n	0	0	1929	none	illit	none	none	FALSE	TRUE	y	n	y	1	n	y	n	n	n	n	NA	NA	FALSE	FALSE	NA	n	1948	NA	NA
SW	Guizhou	1501	1501133	n	0	0	1938	NA	illit	none	none	TRUE	FALSE	y	y	y	4	n	n	n	n	y	n	NA	NA	FALSE	TRUE	NA	n	1956	NA	NA
SW	Guizhou	1501	1501134	n	0	0	1935	none	illit	none	none	FALSE	TRUE	y	n	NA	2	n	n	n	n	n	y	NA	NA	TRUE	FALSE	NA	n	1953	NA	NA
SW	Guizhou	1501	1501135	n	0	0	1925	none	illit	none	none	TRUE	FALSE	n	n	n	4	n	n	n	n	y	n	NA	NA	FALSE	TRUE	NA	n	1941	NA	NA
SW	Guizhou	1501	1501136	n	0	0	1933	none	illit	none	none	FALSE	FALSE	y	y	n	NA	n	n	n	n	n	n	NA	NA	FALSE	FALSE	NA	n	1956	NA	NA
SW	Guizhou	1501	1501137	n	0	0	1929	none	illit	none	none	FALSE	FALSE	y	n	n	3	n	n	n	n	n	n	NA	NA	FALSE	FALSE	NA	n	1947	NA	NA
SW	Guizhou	1501	1501142	n	0	0	1931	none	illit	none	none	TRUE	FALSE	y	n	n	4	n	n	n	n	y	n	NA	NA	FALSE	TRUE	NA	n	1949	NA	NA
SW	Guizhou	1501	1501143	n	0	0	1938	none	illit	none	none	TRUE	FALSE	y	n	n	NA	n	n	n	n	y	n	NA	NA	FALSE	TRUE	NA	n	1956	NA	NA
SW	Guizhou	1501	1501144	n	0	0	1934	none	illit	none	none	TRUE	FALSE	y	n	y	NA	n	n	n	n	y	n	NA	NA	FALSE	TRUE	NA	n	1954	NA	NA
SW	Guizhou	1501	1501145	n	0	0	1927	none	half	none	none	TRUE	TRUE	y	n	y	1	y	y	n	y	y	n	NA	NA	TRUE	TRUE	NA	y	1946	NA	NA
SW	Guizhou	1501	1501147	n	0	0	1931	none	illit	none	none	TRUE	TRUE	y	y	NA	0	n	y	n	y	y	n	NA	0.5	TRUE	TRUE	15	n	1953	NA	7
SW	Guizhou	1501	1501151	n	0	0	1929	none	illit	none	none	FALSE	FALSE	n	n	n	3	n	n	n	n	n	n	NA	NA	FALSE	FALSE	NA	n	1950	NA	NA
SW	Guizhou	1501	1501157	n	0	0	1937	none	illit	none	some	TRUE	NA	y	y	n	4	y	NA	y	n	y	n	NA	NA	FALSE	TRUE	17	y	1957	NA	3
SW	Guizhou	1501	1501158	y	1	NA	1927	none	illit	none	none	TRUE	FALSE	y	y	n	0	n	n	n	n	y	n	NA	NA	FALSE	TRUE	NA	n	1945	TRUE	NA
SW	Guizhou	1501	1501160	y	1	NA	1929	none	illit	none	some	TRUE	TRUE	y	y	n	4	n	y	n	y	y	n	NA	NA	TRUE	TRUE	14	y	1945	TRUE	2
SW	Guizhou	1501	1501165	n	0	0	1939	none	illit	none	none	TRUE	TRUE	y	n	y	1	y	y	n	n	y	y	NA	NA	TRUE	TRUE	11	n	1961	NA	11
SW	Guizhou	1501	1501166	n	0	0	1938	none	illit	none	none	TRUE	TRUE	y	n	n	4	y	n	n	n	y	y	NA	NA	TRUE	TRUE	16	n	1957	NA	3
SW	Guizhou	1501	1501167	n	0	0	1929	NA	lit	some	none	TRUE	TRUE	y	y	y	2	y	y	n	n	y	y	NA	NA	TRUE	TRUE	16	n	1954	NA	9
SW	Guizhou	1501	1501172	y	1	NA	1932	none	illit	none	none	TRUE	NA	y	y	y	3	n	y	n	n	y	NA	NA	0.81	FALSE	TRUE	11	n	1953	TRUE	10
SW	Guizhou	1501	1501173	n	0	0	1933	none	illit	none	none	TRUE	FALSE	y	n	n	4	y	n	n	n	y	n	NA	NA	FALSE	TRUE	13	n	1953	NA	7
SW	Guizhou	1501	1501174	n	0	0	1938	none	illit	none	none	TRUE	NA	NA	y	n	3	y	NA	n	y	y	y	NA	NA	TRUE	TRUE	8	y	1956	NA	10
SW	Guizhou	1501	1501178	n	0	0	1936	none	illit	none	none	FALSE	FALSE	y	NA	n	3	n	n	n	n	n	n	NA	NA	FALSE	FALSE	NA	n	1953	NA	NA
SW	Guizhou	1501	1501194	y	1	NA	1935	some	lit	none	none	TRUE	FALSE	y	y	y	4	y	n	n	n	y	n	NA	NA	FALSE	TRUE	11	n	1954	TRUE	8
SW	Guizhou	1501	1501195	n	0	0	1939	some	illit	none	none	TRUE	TRUE	y	NA	y	4	y	y	n	n	y	n	NA	NA	FALSE	TRUE	15	n	1963	NA	9
SW	Guizhou	1501	1501196	y	1	1	1930	none	illit	none	none	TRUE	TRUE	y	y	y	4	n	y	n	n	y	n	NA	0.81	FALSE	TRUE	12	n	1952	TRUE	10
SW	Guizhou	1501	1501197	n	0	0	1937	none	illit	none	none	TRUE	TRUE	y	NA	y	3	n	y	n	n	y	n	NA	NA	FALSE	TRUE	15	n	1957	NA	5
SW	Guizhou	1501	1501199	n	0	0	1937	none	illit	none	none	TRUE	NA	y	y	y	3	n	n	n	n	y	NA	NA	NA	FALSE	TRUE	NA	n	1954	NA	NA
SW	Guizhou	1501	1501200	n	0	0	1928	none	illit	none	some	TRUE	NA	y	y	y	2	y	n	n	n	y	NA	NA	NA	FALSE	TRUE	NA	n	1945	NA	NA
N	Hebei	1701+1702	1701001	n	0	0	1934	some	NA	none	none	TRUE	FALSE	n	y	n	4	n	n	n	n	y	n	NA	NA	FALSE	TRUE	24	n	1953	NA	-5
N	Hebei	1701+1702	1701002	n	0	0	1935	none	illit	none	NA	FALSE	TRUE	y	n	n	3	n	y	n	n	n	n	NA	NA	FALSE	FALSE	7	y	1952	NA	10
N	Hebei	1701+1702	1701003	n	0	0	1939	some	lit	none	none	TRUE	TRUE	y	y	y	4	y	y	n	y	y	n	NA	NA	TRUE	TRUE	7.5	y	1959	NA	12.5
N	Hebei	1701+1702	1701004	n	0	0	1930	none	illit	none	none	TRUE	TRUE	n	y	n	3	y	y	n	n	y	n	NA	NA	FALSE	TRUE	12.5	n	1951	NA	8.5
N	Hebei	1701+1702	1701005	n	0	0	1936	none	illit	none	some	TRUE	FALSE	n	y	n	4	y	n	y	n	y	n	NA	NA	FALSE	TRUE	12.5	y	1956	NA	7.5
N	Hebei	1701+1702	1701006	n	0	0	1940	some	NA	none	none	TRUE	FALSE	y	y	n	4	y	n	n	n	y	n	NA	NA	FALSE	TRUE	8.5	n	1958	NA	9.5
N	Hebei	1701+1702	1701007	n	0	0	1937	some	NA	none	none	TRUE	FALSE	y	NA	n	4	n	n	n	n	y	n	NA	NA	FALSE	TRUE	25	n	1956	NA	-6
N	Hebei	1701+1702	1701008	n	0	0	1930	none	illit	none	NA	TRUE	FALSE	y	y	n	1	y	n	y	n	y	n	NA	NA	FALSE	TRUE	8	y	1952	NA	14
N	Hebei	1701+1702	1701009	n	0	0	1936	some	NA	none	NA	TRUE	TRUE	y	NA	n	4	n	y	y	n	y	n	NA	NA	FALSE	TRUE	12	n	1957	NA	9
N	Hebei	1701+1702	1701010	n	0	0	1941	some	NA	none	some	TRUE	FALSE	y	n	y	3	n	n	n	n	y	n	NA	NA	FALSE	TRUE	12.5	y	1965	NA	11.5
N	Hebei	1701+1702	1701011	n	0	0	1937	some	NA	none	none	TRUE	TRUE	y	n	n	4	n	y	n	y	y	n	NA	0.4	TRUE	TRUE	12.5	y	1963	NA	13.5
N	Hebei	1701+1702	1701012	n	0	0	1932	some	half	none	none	TRUE	TRUE	y	y	y	4	n	y	n	n	y	n	NA	NA	FALSE	TRUE	13	n	1953	NA	8
N	Hebei	1701+1702	1701013	n	0	0	1931	none	illit	none	none	TRUE	TRUE	y	n	NA	4	n	y	y	n	y	n	NA	NA	FALSE	TRUE	10.5	y	1952	NA	10.5
N	Hebei	1701+1702	1701014	n	0	0	1928	none	illit	none	some	TRUE	TRUE	y	y	n	4	y	y	y	y	y	n	NA	NA	TRUE	TRUE	10.5	n	1953	NA	14.5
N	Hebei	1701+1702	1701015	n	0	0	1934	none	illit	none	some	TRUE	TRUE	y	NA	n	4	n	y	n	n	y	y	NA	NA	TRUE	TRUE	10	n	1956	NA	12
N	Hebei	1701+1702	1701016	n	0	0	1932	none	illit	none	none	FALSE	TRUE	y	y	y	1	n	y	n	n	n	n	NA	NA	FALSE	FALSE	10	n	1949	NA	7
N	Hebei	1701+1702	1701017	y	1	NA	1925	none	illit	none	none	TRUE	TRUE	y	y	n	4	y	y	n	y	y	n	NA	NA	TRUE	TRUE	8	y	1950	TRUE	17
N	Hebei	1701+1702	1701018	n	0	0	1939	none	illit	none	none	FALSE	FALSE	y	n	n	3	n	n	n	n	n	n	NA	NA	FALSE	FALSE	20	y	1959	NA	0
N	Hebei	1701+1702	1701019	n	0	0	1941	some	half	none	some	FALSE	TRUE	y	y	n	4	n	y	n	n	n	n	NA	NA	FALSE	FALSE	7.5	y	1964	NA	15.5
N	Hebei	1701+1702	1701020	n	0	0	1933	some	lit	none	none	TRUE	TRUE	y	y	n	4	n	y	n	y	y	n	NA	NA	TRUE	TRUE	10	y	1959	NA	16
N	Hebei	1701+1702	1701021	n	0	0	1934	none	illit	none	none	TRUE	FALSE	n	NA	n	4	y	n	n	n	n	n	NA	NA	FALSE	FALSE	20.5	n	1956	NA	1.5
N	Hebei	1701+1702	1701022	n	0	0	1916	some	lit	none	none	FALSE	TRUE	y	y	y	4	n	y	n	n	n	n	NA	NA	FALSE	FALSE	12	n	1933	NA	5
N	Hebei	1701+1702	1701023	n	0	0	1925	none	illit	none	none	TRUE	FALSE	n	NA	n	4	y	n	y	n	y	n	NA	NA	FALSE	TRUE	12	n	1950	NA	13
N	Hebei	1701+1702	1701024	n	0	0	1930	none	illit	none	none	TRUE	TRUE	y	n	n	4	y	y	y	y	y	n	NA	NA	TRUE	TRUE	9	y	1952	NA	13
N	Hebei	1701+1702	1701025	n	0	0	1932	none	illit	none	none	TRUE	TRUE	y	y	y	4	y	y	y	y	y	n	NA	NA	TRUE	TRUE	12	y	1956	NA	12
N	Hebei	1701+1702	1701026	n	0	0	1938	none	illit	none	none	TRUE	FALSE	y	n	n	4	y	n	n	n	y	n	NA	NA	FALSE	TRUE	12	n	1963	NA	13
N	Hebei	1701+1702	1701027	n	0	0	1926	none	illit	none	none	TRUE	TRUE	y	n	n	3	y	y	n	n	y	n	NA	NA	FALSE	TRUE	10	n	1945	NA	9
N	Hebei	1701+1702	1701028	n	0	0	1930	NA	lit	some	some	TRUE	TRUE	n	y	y	1	y	y	y	y	y	n	NA	NA	TRUE	TRUE	10	y	1949	NA	9
N	Hebei	1701+1702	1701029	n	0	0	1930	some	half	none	none	TRUE	TRUE	y	y	y	4	y	y	n	n	y	n	NA	NA	FALSE	TRUE	12	n	1950	NA	8
N	Hebei	1701+1702	1701030	n	0	0	1928	none	illit	none	none	TRUE	FALSE	y	y	n	4	y	n	n	n	n	n	NA	NA	FALSE	FALSE	12	n	1946	NA	6
N	Hebei	1701+1702	1701031	y	1	NA	1928	none	illit	none	none	TRUE	TRUE	y	y	n	3	y	y	y	y	y	n	NA	NA	TRUE	TRUE	8	n	1948	TRUE	12
N	Hebei	1701+1702	1701032	n	0	0	1929	none	illit	none	none	TRUE	TRUE	y	y	n	3	y	y	y	y	y	n	NA	NA	TRUE	TRUE	8	n	1946	NA	9
N	Hebei	1701+1702	1701033	n	0	0	1936	none	illit	none	none	TRUE	FALSE	y	n	n	3	y	n	y	n	y	n	NA	NA	FALSE	TRUE	11	y	1955	NA	8
N	Hebei	1701+1702	1701034	n	0	0	1934	none	illit	none	none	TRUE	TRUE	y	n	n	4	y	y	y	y	n	n	NA	NA	TRUE	TRUE	12	y	1957	NA	11
N	Hebei	1701+1702	1701035	n	0	0	1938	some	lit	none	none	TRUE	FALSE	y	y	n	4	y	n	y	n	y	n	NA	NA	FALSE	TRUE	15	y	1959	NA	6
N	Hebei	1701+1702	1701036	y	1	NA	1924	none	illit	none	some	TRUE	TRUE	y	y	y	4	n	y	n	y	y	n	NA	NA	TRUE	TRUE	13	y	1942	TRUE	5
N	Hebei	1701+1702	1701037	n	0	0	1927	none	illit	none	some	NA	NA	y	NA	NA	4	NA	y	NA	NA	n	n	NA	NA	FALSE	FALSE	10	y	1949	NA	12
N	Hebei	1701+1702	1701038	n	0	0	1916	some	lit	NA	NA	NA	NA	n	y	NA	4	n	n	NA	NA	n	n	NA	NA	FALSE	FALSE	NA	n	1938	NA	NA
N	Hebei	1701+1702	1701039	n	0	0	1925	some	lit	some	some	NA	NA	n	y	NA	4	y	NA	NA	NA	n	n	NA	NA	FALSE	FALSE	11	y	1948	NA	12
N	Hebei	1701+1702	1701040	n	0	0	1933	none	illit	none	none	NA	TRUE	y	y	y	4	NA	y	NA	y	y	n	NA	NA	TRUE	TRUE	8	y	1951	NA	10
N	Hebei	1701+1702	1701041	n	0	0	1933	some	NA	none	none	NA	NA	y	NA	n	4	NA	y	NA	NA	n	n	NA	NA	FALSE	FALSE	8	y	1954	NA	13
N	Hebei	1701+1702	1701042	n	0	0	1938	none	illit	none	none	NA	TRUE	y	n	NA	NA	NA	y	NA	y	n	n	NA	NA	TRUE	FALSE	12	NA	1958	NA	8
N	Hebei	1701+1702	1701043	n	0	0	1935	some	lit	none	some	NA	NA	y	y	NA	4	NA	y	y	NA	n	n	NA	NA	FALSE	TRUE	7	y	1955	NA	13
N	Hebei	1701+1702	1701044	y	1	NA	1917	none	illit	none	none	NA	NA	y	y	NA	NA	NA	y	NA	NA	n	n	NA	NA	FALSE	FALSE	12	NA	1941	NA	12
N	Hebei	1701+1702	1701045	n	0	0	1931	none	illit	none	none	NA	NA	y	y	NA	4	NA	y	NA	NA	n	n	NA	NA	FALSE	FALSE	12	y	1951	NA	8
N	Hebei	1701+1702	1701046	n	0	0	1929	none	illit	none	none	NA	NA	y	y	NA	3	NA	y	NA	NA	n	n	NA	NA	FALSE	FALSE	14.5	y	1952	NA	8.5
N	Hebei	1701+1702	1701047	n	0	0	1940	none	illit	none	none	FALSE	FALSE	y	NA	NA	2	n	n	n	n	n	n	NA	NA	FALSE	FALSE	NA	n	NA	NA	NA
N	Hebei	1701+1702	1701048	y	1	NA	1927	none	illit	none	some	NA	NA	y	y	n	4	NA	y	y	NA	y	n	NA	NA	FALSE	TRUE	7	y	1948	TRUE	14
N	Hebei	1701+1702	1701049	n	0	0	1930	some	half	none	none	NA	NA	y	y	NA	4	NA	y	NA	NA	n	n	NA	NA	FALSE	FALSE	13	n	1953	NA	10
N	Hebei	1701+1702	1701050	n	0	0	1937	some	half	none	none	NA	NA	n	y	NA	4	n	n	NA	NA	n	n	NA	NA	FALSE	FALSE	NA	y	1957	NA	NA
N	Hebei	1701+1702	1701051	n	0	0	1940	none	NA	none	some	NA	TRUE	y	y	NA	3	NA	y	NA	y	n	n	NA	NA	TRUE	FALSE	12	y	1961	NA	9
N	Hebei	1701+1702	1701052	n	0	0	1933	none	illit	none	none	NA	NA	y	y	NA	4	y	NA	NA	NA	n	n	NA	NA	FALSE	FALSE	13	y	1956	NA	10
N	Hebei	1701+1702	1701053	n	0	0	1932	none	illit	none	none	NA	TRUE	y	NA	NA	4	NA	y	NA	y	n	n	NA	NA	TRUE	FALSE	12	y	1952	NA	8
N	Hebei	1701+1702	1701054	n	0	0	1938	some	half	none	none	NA	NA	y	y	NA	3	NA	y	NA	NA	n	n	NA	NA	FALSE	FALSE	8	y	1957	NA	11
N	Hebei	1701+1702	1701055	n	0	0	1932	none	illit	none	none	NA	NA	y	y	NA	4	NA	y	y	NA	n	n	NA	NA	FALSE	TRUE	7	y	1949	NA	10
N	Hebei	1701+1702	1701056	n	0	0	1929	none	illit	none	none	NA	NA	y	y	NA	4	y	NA	NA	y	n	n	NA	NA	TRUE	FALSE	10	y	1949	NA	10
N	Hebei	1701+1702	1701057	n	0	0	1924	none	illit	none	none	TRUE	TRUE	y	y	y	4	y	y	y	n	y	n	NA	NA	FALSE	TRUE	7	n	1949	NA	18
N	Hebei	1701+1702	1701058	n	0	0	1932	some	half	none	none	NA	NA	NA	NA	y	NA	NA	NA	NA	NA	NA	NA	NA	NA	FALSE	FALSE	NA	NA	1946	NA	NA
N	Hebei	1701+1702	1701059	n	0	0	1932	some	lit	none	none	TRUE	TRUE	n	y	NA	3	y	y	n	n	y	n	NA	0.22	FALSE	TRUE	13	n	1948	NA	3
N	Hebei	1701+1702	1701060	n	0	0	1933	some	lit	none	none	FALSE	FALSE	n	y	n	2	n	n	n	n	n	n	NA	NA	FALSE	FALSE	15	n	1952	NA	4
N	Hebei	1701+1702	1701061	n	0	0	1940	some	lit	none	none	TRUE	TRUE	NA	y	y	4	n	y	n	n	y	n	NA	NA	FALSE	TRUE	10	n	1962	NA	12
N	Hebei	1701+1702	1701062	n	0	0	1940	none	illit	none	none	TRUE	TRUE	y	y	n	4	y	y	y	n	y	n	NA	NA	FALSE	TRUE	12	n	1960	NA	8
N	Hebei	1701+1702	1701063	n	0	0	1927	some	half	none	NA	TRUE	FALSE	y	y	n	4	y	n	y	n	y	n	NA	NA	FALSE	TRUE	15	y	1946	NA	4
N	Hebei	1701+1702	1701064	n	0	0	1940	some	lit	NA	some	TRUE	TRUE	y	n	n	4	n	y	n	n	y	n	NA	NA	FALSE	TRUE	15	n	1961	NA	6
N	Hebei	1701+1702	1701065	n	0	0	1938	some	illit	none	some	TRUE	TRUE	y	y	y	4	y	y	y	n	y	n	NA	NA	FALSE	TRUE	18	n	1962	NA	6
N	Hebei	1701+1702	1701066	n	0	0	1923	none	illit	none	none	FALSE	FALSE	y	y	n	4	n	n	n	n	n	n	NA	NA	FALSE	FALSE	25	n	1946	NA	-2
N	Hebei	1701+1702	1701067	n	0	0	1939	none	illit	none	none	TRUE	FALSE	y	n	y	4	y	n	y	n	y	n	NA	NA	FALSE	TRUE	7	n	1960	NA	14
N	Hebei	1701+1702	1701068	n	0	0	1938	some	half	none	none	TRUE	TRUE	y	y	y	4	y	y	n	n	y	n	NA	NA	FALSE	TRUE	12	n	1957	NA	7
N	Hebei	1701+1702	1701069	n	0	0	1940	some	lit	none	some	TRUE	NA	y	y	y	4	n	y	n	n	y	NA	NA	NA	FALSE	TRUE	20	n	1962	NA	2
N	Hebei	1701+1702	1701070	n	0	0	1929	none	illit	none	none	TRUE	TRUE	y	y	y	4	y	y	n	n	y	n	NA	NA	FALSE	TRUE	14	n	1949	NA	6
N	Hebei	1701+1702	1701071	n	0	0	1933	some	illit	none	NA	FALSE	TRUE	n	y	y	3	n	y	n	n	n	n	NA	NA	FALSE	FALSE	NA	n	1953	NA	NA
N	Hebei	1701+1702	1701072	n	0	0	1939	none	NA	none	none	TRUE	FALSE	NA	n	NA	4	y	n	y	n	y	n	NA	NA	FALSE	TRUE	14.5	n	1959	NA	5.5
N	Hebei	1701+1702	1701073	n	0	0	1939	NA	NA	none	none	TRUE	TRUE	NA	n	NA	NA	n	y	n	n	y	n	NA	NA	FALSE	TRUE	10.5	n	1961	NA	11.5
N	Hebei	1701+1702	1701074	n	0	0	1931	none	NA	none	none	TRUE	FALSE	n	y	NA	3	n	n	n	n	y	n	NA	NA	FALSE	TRUE	25	n	1956	NA	0
N	Hebei	1701+1702	1701075	n	0	0	1935	some	NA	none	none	TRUE	TRUE	y	y	NA	3	n	y	y	n	y	n	NA	NA	FALSE	TRUE	15	y	1955	NA	5
N	Hebei	1701+1702	1701076	n	0	0	1937	some	NA	none	none	TRUE	TRUE	NA	y	NA	4	y	y	n	n	y	n	NA	NA	FALSE	TRUE	15	y	1959	NA	7
N	Hebei	1701+1702	1701077	n	0	0	1939	none	NA	none	none	TRUE	FALSE	y	y	NA	NA	n	n	n	n	y	n	NA	NA	FALSE	TRUE	NA	n	1962	NA	NA
N	Hebei	1701+1702	1701078	n	0	0	1932	none	NA	none	none	TRUE	TRUE	y	y	NA	NA	n	y	y	n	y	n	NA	NA	FALSE	TRUE	NA	n	1959	NA	NA
N	Hebei	1701+1702	1701079	n	0	0	1936	some	NA	none	none	TRUE	FALSE	n	y	NA	1	n	n	n	n	y	n	NA	NA	FALSE	TRUE	27	n	1961	NA	-2
N	Hebei	1701+1702	1701080	n	0	0	1933	none	NA	none	none	TRUE	TRUE	y	y	NA	4	n	y	y	n	y	n	NA	NA	FALSE	TRUE	12	n	1954	NA	9
N	Hebei	1701+1702	1701081	n	0	0	1936	none	NA	none	none	TRUE	TRUE	y	y	NA	3	y	y	n	n	y	n	NA	0.4	FALSE	TRUE	8.5	n	1958	NA	13.5
N	Hebei	1701+1702	1701082	n	0	0	1939	some	NA	none	none	NA	NA	NA	y	NA	NA	y	n	NA	NA	y	n	NA	NA	FALSE	TRUE	7.5	y	1965	NA	18.5
N	Hebei	1701+1702	1701083	n	0	0	1932	none	NA	none	none	TRUE	TRUE	n	n	NA	3	y	n	n	y	y	n	NA	NA	TRUE	TRUE	12.5	n	1955	NA	10.5
N	Hebei	1701+1702	1701084	n	0	0	1929	none	NA	none	none	TRUE	TRUE	y	y	NA	3	y	n	n	y	y	n	NA	NA	TRUE	TRUE	7.5	y	1952	NA	15.5
N	Hebei	1701+1702	1701085	n	0	0	1927	none	NA	none	none	TRUE	TRUE	y	NA	NA	3	y	y	n	n	y	n	NA	NA	FALSE	TRUE	20.5	n	1946	NA	-1.5
N	Hebei	1701+1702	1701086	n	0	0	1936	none	NA	none	none	TRUE	TRUE	y	y	NA	4	n	y	n	n	y	n	NA	0.2	FALSE	TRUE	12	n	1955	NA	7
N	Hebei	1701+1702	1701087	n	0	0	1938	some	NA	none	none	TRUE	TRUE	n	n	NA	3	n	y	n	n	y	n	NA	NA	FALSE	TRUE	10	n	1962	NA	14
N	Hebei	1701+1702	1701088	n	0	0	1936	none	NA	none	none	TRUE	TRUE	y	n	NA	3	n	y	n	y	y	n	NA	NA	TRUE	TRUE	10.5	n	1959	NA	12.5
N	Hebei	1701+1702	1701089	n	0	0	1939	some	NA	none	none	TRUE	FALSE	y	y	NA	3	y	n	y	n	y	n	NA	NA	FALSE	TRUE	14.5	y	1963	NA	9.5
N	Hebei	1701+1702	1701090	n	0	0	1929	none	NA	none	none	TRUE	TRUE	y	y	NA	1	n	y	y	y	y	n	NA	NA	TRUE	TRUE	10	y	1950	NA	11
N	Hebei	1701+1702	1701091	n	0	0	1937	none	NA	none	none	TRUE	TRUE	y	y	NA	4	y	y	y	n	y	n	NA	NA	FALSE	TRUE	12.5	n	1957	NA	7.5
N	Hebei	1701+1702	1701092	n	0	0	1930	none	NA	none	none	TRUE	TRUE	y	y	NA	1	y	y	n	y	y	n	NA	NA	TRUE	TRUE	8.5	n	1953	NA	14.5
N	Hebei	1701+1702	1701093	n	0	0	1937	none	NA	none	none	TRUE	TRUE	y	y	NA	4	n	y	n	y	y	n	NA	NA	TRUE	TRUE	10	y	1963	NA	16
N	Hebei	1701+1702	1701094	n	0	0	1932	none	NA	none	none	TRUE	TRUE	y	y	NA	3	y	y	n	y	y	n	NA	NA	TRUE	TRUE	7.5	n	1949	NA	9.5
N	Hebei	1701+1702	1701095	n	0	0	1942	some	NA	none	none	TRUE	FALSE	y	y	NA	3	y	n	y	n	y	n	NA	NA	FALSE	TRUE	20	n	1972	NA	10
N	Hebei	1701+1702	1701096	n	0	0	1942	some	NA	none	NA	FALSE	FALSE	n	y	NA	4	n	n	n	n	n	n	NA	NA	FALSE	FALSE	NA	y	1962	NA	NA
N	Hebei	1701+1702	1701097	n	0	0	1936	none	NA	none	none	TRUE	TRUE	y	y	NA	3	y	y	n	n	y	n	NA	NA	FALSE	TRUE	4	y	1956	NA	16
N	Hebei	1701+1702	1701099	n	0	0	1934	some	NA	some	some	TRUE	TRUE	y	y	NA	4	y	y	n	y	y	n	NA	NA	TRUE	TRUE	NA	n	1958	NA	NA
N	Hebei	1701+1702	1701100	n	0	0	1941	some	NA	none	none	TRUE	FALSE	y	NA	NA	NA	n	n	n	n	y	n	NA	NA	FALSE	TRUE	NA	n	1963	NA	NA
N	Hebei	1701+1702	1701101	n	0	0	1940	none	NA	none	none	FALSE	FALSE	y	y	NA	4	n	n	n	n	n	n	NA	NA	FALSE	FALSE	NA	n	1961	NA	NA
N	Hebei	1701+1702	1701102	n	0	0	1934	some	NA	NA	NA	NA	TRUE	y	NA	NA	NA	y	y	NA	y	n	n	NA	NA	TRUE	FALSE	NA	NA	1957	NA	NA
N	Hebei	1701+1702	1701103	n	0	0	1930	none	illit	none	NA	NA	NA	y	NA	NA	1	NA	y	NA	NA	y	n	NA	NA	FALSE	TRUE	8	n	1949	NA	11
N	Hebei	1701+1702	1701104	n	0	0	1933	none	illit	none	none	TRUE	TRUE	y	NA	NA	NA	n	y	n	y	y	n	NA	NA	TRUE	TRUE	7	n	1954	NA	14
N	Hebei	1701+1702	1701105	n	0	0	1928	none	illit	none	none	TRUE	TRUE	y	n	NA	3	y	y	y	y	y	n	NA	0.16	TRUE	TRUE	NA	n	1946	NA	NA
N	Hebei	1701+1702	1701106	n	0	0	1937	none	illit	none	none	TRUE	TRUE	y	y	NA	4	y	y	y	n	y	n	NA	0.09	FALSE	TRUE	7	y	1959	NA	15
N	Hebei	1701+1702	1701107	n	0	0	1940	none	illit	none	none	TRUE	TRUE	NA	y	NA	0	n	y	n	n	y	n	NA	NA	FALSE	TRUE	NA	n	1961	NA	NA
N	Hebei	1701+1702	1701108	n	0	0	1926	none	illit	none	none	NA	NA	y	y	NA	3	y	y	NA	NA	y	n	NA	NA	FALSE	TRUE	18	n	1947	NA	3
N	Hebei	1701+1702	1701109	n	0	0	1937	none	illit	none	none	TRUE	TRUE	y	y	NA	4	y	y	y	n	y	n	NA	NA	FALSE	TRUE	NA	n	1956	NA	NA
N	Hebei	1701+1702	1701110	n	0	0	1938	none	illit	none	none	TRUE	TRUE	NA	y	NA	NA	n	y	y	n	y	n	NA	NA	FALSE	TRUE	6	y	1963	NA	19
N	Hebei	1701+1702	1701111	n	0	0	1930	some	illit	none	none	FALSE	TRUE	n	y	NA	NA	n	y	n	n	n	n	NA	NA	FALSE	FALSE	7	n	1949	NA	12
N	Hebei	1701+1702	1701112	n	0	0	1939	none	illit	none	none	TRUE	FALSE	NA	y	NA	3	n	n	n	n	y	n	NA	NA	FALSE	TRUE	NA	n	1962	NA	NA
N	Hebei	1701+1702	1701113	n	0	0	1933	none	illit	none	none	TRUE	TRUE	n	y	NA	4	y	y	y	n	y	n	NA	NA	FALSE	TRUE	7	y	1955	NA	15
N	Hebei	1701+1702	1701114	n	0	0	1936	none	illit	none	none	TRUE	TRUE	y	y	NA	3	n	y	y	n	y	n	NA	NA	FALSE	TRUE	7	n	1957	NA	14
N	Hebei	1701+1702	1701115	n	0	0	1940	none	illit	none	none	TRUE	TRUE	n	NA	NA	4	y	y	n	n	y	n	NA	NA	FALSE	TRUE	8	n	1963	NA	15
N	Hebei	1701+1702	1701116	n	0	0	1924	none	illit	none	none	TRUE	FALSE	n	y	NA	0	n	n	n	n	y	n	NA	NA	FALSE	TRUE	11	n	1943	NA	8
N	Hebei	1701+1702	1701117	n	0	0	1923	none	illit	none	none	TRUE	TRUE	y	y	NA	2	y	y	y	n	y	n	NA	NA	FALSE	TRUE	7.5	n	1941	NA	10.5
N	Hebei	1701+1702	1701118	n	0	0	1936	some	half	none	none	TRUE	TRUE	n	y	NA	3	n	y	n	n	y	n	NA	0.06	FALSE	TRUE	11.5	n	1959	NA	11.5
N	Hebei	1701+1702	1701119	n	0	0	1935	none	illit	none	none	TRUE	TRUE	y	y	NA	3	y	y	n	n	y	n	NA	NA	FALSE	TRUE	13	n	1956	NA	8
N	Hebei	1701+1702	1701120	n	0	0	1939	none	illit	none	none	TRUE	TRUE	y	y	NA	3	n	y	n	n	y	n	NA	NA	FALSE	TRUE	7	n	1958	NA	12
N	Hebei	1701+1702	1701121	n	0	0	1923	none	illit	none	none	TRUE	TRUE	y	y	NA	4	n	y	y	n	y	n	NA	NA	FALSE	TRUE	12.5	y	1944	NA	8.5
N	Hebei	1701+1702	1701122	n	0	0	1939	some	illit	none	none	TRUE	TRUE	NA	y	NA	3	y	y	n	n	y	n	NA	NA	FALSE	TRUE	14.5	n	1960	NA	6.5
N	Hebei	1701+1702	1701123	n	0	0	1932	none	illit	none	none	TRUE	TRUE	n	y	NA	4	y	y	n	n	y	n	NA	NA	FALSE	TRUE	11.5	n	1950	NA	6.5
N	Hebei	1701+1702	1701124	n	0	0	1931	none	illit	none	none	TRUE	TRUE	y	y	NA	3	y	y	n	n	y	n	NA	NA	FALSE	TRUE	12	n	1951	NA	8
N	Hebei	1701+1702	1701125	n	0	0	1940	NA	NA	none	none	TRUE	TRUE	y	y	NA	4	n	y	y	y	y	n	NA	NA	TRUE	TRUE	6	y	1959	NA	13
N	Hebei	1701+1702	1701126	y	1	NA	1936	some	half	none	none	TRUE	NA	y	NA	NA	3	y	NA	y	NA	n	n	NA	NA	FALSE	TRUE	8	y	1955	TRUE	11
N	Hebei	1701+1702	1701127	y	1	NA	1921	none	illit	none	none	NA	NA	y	y	NA	4	NA	NA	n	n	n	n	NA	NA	FALSE	FALSE	7	n	1940	TRUE	12
N	Hebei	1701+1702	1701128	n	0	0	1934	none	illit	NA	NA	NA	NA	y	y	NA	4	y	NA	NA	NA	n	n	NA	NA	FALSE	FALSE	NA	y	1956	NA	NA
N	Hebei	1701+1702	1701129	n	0	0	1932	none	half	NA	NA	TRUE	NA	y	y	NA	NA	y	NA	y	y	n	n	NA	NA	TRUE	TRUE	10	y	1951	NA	9
N	Hebei	1701+1702	1701130	n	0	0	1936	NA	half	none	none	NA	NA	y	y	NA	4	NA	NA	y	y	n	n	NA	NA	TRUE	TRUE	12	y	1956	NA	8
N	Hebei	1701+1702	1701131	n	0	0	1933	some	NA	none	NA	NA	TRUE	n	y	n	4	NA	y	n	n	n	n	NA	NA	FALSE	FALSE	NA	y	NA	NA	NA
N	Hebei	1701+1702	1701132	n	0	0	1933	NA	lit	none	some	NA	NA	y	NA	NA	4	y	NA	NA	NA	y	n	NA	NA	FALSE	TRUE	8	n	1952	NA	11
N	Hebei	1701+1702	1701133	n	0	0	1939	some	NA	NA	NA	TRUE	NA	y	n	NA	4	y	NA	y	NA	y	n	NA	NA	FALSE	TRUE	14	n	NA	NA	NA
N	Hebei	1701+1702	1701134	n	0	0	1938	none	illit	none	NA	NA	NA	y	NA	n	4	y	NA	NA	NA	y	n	NA	NA	FALSE	TRUE	8	y	1957	NA	11
N	Hebei	1701+1702	1701135	n	0	0	1933	NA	illit	none	none	NA	NA	y	y	y	3	NA	y	NA	NA	n	n	NA	NA	FALSE	FALSE	14	n	1952	NA	5
N	Hebei	1701+1702	1701136	n	0	0	1930	NA	half	none	none	NA	NA	y	y	y	4	y	NA	NA	NA	n	n	NA	NA	FALSE	FALSE	NA	y	1949	NA	NA
N	Hebei	1701+1702	1701137	n	0	0	1932	NA	illit	none	none	TRUE	NA	y	y	y	4	y	NA	n	n	n	n	NA	NA	FALSE	FALSE	10	n	1951	NA	9
N	Hebei	1701+1702	1701138	n	0	0	1932	none	illit	none	none	NA	NA	y	y	NA	4	NA	y	y	NA	y	n	NA	NA	FALSE	TRUE	12	n	1954	NA	10
N	Hebei	1701+1702	1702001	n	0	0	1930	some	half	none	NA	TRUE	TRUE	y	y	n	4	y	y	n	n	y	n	NA	NA	FALSE	TRUE	14	n	1955	NA	11
N	Hebei	1701+1702	1702002	n	0	0	1939	some	lit	none	some	TRUE	TRUE	y	y	n	4	y	y	n	n	y	n	NA	NA	FALSE	TRUE	11	n	1964	NA	14
N	Hebei	1701+1702	1702003	n	0	0	1931	some	illit	none	none	TRUE	TRUE	y	y	n	4	y	y	y	y	y	n	NA	NA	TRUE	TRUE	9	y	1951	NA	11
N	Hebei	1701+1702	1702004	n	0	0	1933	some	half	none	NA	TRUE	TRUE	y	y	y	4	y	y	y	y	y	n	NA	NA	TRUE	TRUE	9	y	1956	NA	14
N	Hebei	1701+1702	1702005	n	0	0	1928	none	illit	none	none	TRUE	TRUE	y	y	n	4	y	y	y	y	y	n	NA	NA	TRUE	TRUE	6	y	1953	NA	19
N	Hebei	1701+1702	1702006	n	0	0	1933	none	illit	none	none	TRUE	TRUE	y	y	NA	3	y	y	y	y	y	n	NA	NA	TRUE	TRUE	12	y	1954	NA	9
N	Hebei	1701+1702	1702007	n	0	0	1934	none	illit	none	none	TRUE	TRUE	y	y	NA	4	y	y	y	y	y	n	NA	NA	TRUE	TRUE	10	y	1952	NA	8
N	Hebei	1701+1702	1702008	n	0	0	1930	none	illit	none	none	TRUE	TRUE	y	y	n	1	y	y	y	y	y	n	NA	NA	TRUE	TRUE	8	y	1947	NA	9
N	Hebei	1701+1702	1702009	n	0	0	1926	none	illit	none	none	TRUE	TRUE	y	y	n	3	n	y	n	n	y	y	NA	NA	TRUE	TRUE	10.5	n	1950	NA	13.5
N	Hebei	1701+1702	1702010	n	0	0	1927	none	illit	none	none	TRUE	TRUE	y	y	y	4	n	y	n	n	y	y	NA	NA	TRUE	TRUE	10	n	1949	NA	12
N	Hebei	1701+1702	1702011	n	0	0	1931	none	illit	none	none	FALSE	TRUE	n	y	n	3	n	y	n	n	n	y	NA	NA	TRUE	FALSE	10.5	n	1953	NA	11.5
N	Hebei	1701+1702	1702012	n	0	0	1934	none	illit	none	none	FALSE	TRUE	n	y	y	1	n	y	n	n	n	n	NA	NA	FALSE	FALSE	7.5	n	1954	NA	12.5
N	Hebei	1701+1702	1702013	n	0	0	1937	none	illit	none	none	TRUE	TRUE	y	y	n	3	n	y	n	y	y	n	NA	0.4	TRUE	TRUE	7.5	y	1964	NA	19.5
N	Hebei	1701+1702	1702014	n	0	0	1935	none	illit	none	none	TRUE	TRUE	n	y	y	3	n	y	n	n	y	y	NA	NA	TRUE	TRUE	10	n	1954	NA	9
N	Hebei	1701+1702	1702015	n	0	0	1929	none	half	none	none	TRUE	TRUE	n	y	n	NA	n	y	n	y	y	n	NA	NA	TRUE	TRUE	5.5	y	1952	NA	17.5
N	Hebei	1701+1702	1702016	y	1	1	1921	none	illit	none	none	TRUE	TRUE	n	y	n	3	n	n	n	n	y	y	NA	NA	TRUE	TRUE	NA	n	1936	TRUE	NA
N	Hebei	1701+1702	1702017	n	0	0	1929	some	half	none	none	TRUE	TRUE	y	y	y	4	n	y	n	y	y	n	NA	0.4	TRUE	TRUE	14.5	n	1948	NA	4.5
N	Hebei	1701+1702	1702018	n	0	0	1934	none	illit	none	none	TRUE	TRUE	y	n	y	3	n	y	n	n	y	n	NA	NA	FALSE	TRUE	13.5	y	1953	NA	5.5
N	Hebei	1701+1702	1702019	n	0	0	1934	none	illit	none	some	TRUE	TRUE	y	n	y	4	n	y	n	y	y	n	NA	NA	TRUE	TRUE	12	y	1958	NA	12
N	Hebei	1701+1702	1702020	n	0	0	1930	some	NA	none	none	TRUE	TRUE	y	y	y	4	y	y	n	y	y	n	NA	NA	TRUE	TRUE	7	y	1950	NA	13
N	Hebei	1701+1702	1702021	n	0	0	1928	none	illit	none	none	TRUE	FALSE	y	y	y	4	y	n	y	n	y	n	NA	NA	FALSE	TRUE	12.5	y	1949	NA	8.5
N	Hebei	1701+1702	1702022	n	0	0	1938	none	illit	none	none	TRUE	TRUE	y	y	n	4	y	y	n	n	n	n	NA	NA	FALSE	FALSE	13	y	1955	NA	4
N	Hebei	1701+1702	1702023	n	0	0	1935	none	illit	none	none	TRUE	FALSE	y	y	n	3	n	n	n	n	y	n	NA	NA	FALSE	TRUE	20	n	1958	NA	3
N	Hebei	1701+1702	1702024	n	0	0	1930	some	lit	none	some	TRUE	TRUE	y	y	y	3	y	y	n	y	y	n	NA	NA	TRUE	TRUE	10	y	1951	NA	11
N	Hebei	1701+1702	1702025	n	0	0	1935	none	illit	none	none	TRUE	TRUE	y	y	n	4	n	n	n	n	y	y	NA	NA	TRUE	TRUE	NA	n	1958	NA	NA
N	Hebei	1701+1702	1702026	n	0	0	1931	some	half	none	none	TRUE	TRUE	y	y	y	4	n	y	n	n	y	n	NA	0.5	FALSE	TRUE	11	n	1957	NA	15
N	Hebei	1701+1702	1702027	n	0	0	1932	none	illit	none	none	NA	NA	n	y	NA	3	NA	NA	NA	NA	n	n	NA	NA	FALSE	FALSE	NA	NA	1960	NA	NA
N	Hebei	1701+1702	1702028	n	0	0	1931	none	illit	none	none	NA	NA	y	n	NA	NA	y	y	NA	NA	n	n	NA	NA	FALSE	FALSE	11	n	1952	NA	10
N	Hebei	1701+1702	1702029	n	0	0	1936	none	illit	none	none	NA	NA	y	y	NA	NA	NA	NA	NA	NA	NA	NA	NA	NA	FALSE	FALSE	NA	n	1953	NA	NA
N	Hebei	1701+1702	1702030	n	0	0	1930	none	illit	none	none	NA	NA	y	y	NA	NA	NA	y	NA	NA	n	n	NA	NA	FALSE	FALSE	NA	n	1950	NA	NA
N	Hebei	1701+1702	1702031	n	0	0	1935	none	illit	none	none	NA	NA	n	y	NA	3	NA	y	NA	NA	n	n	NA	0.5	FALSE	FALSE	13	n	1957	NA	9
N	Hebei	1701+1702	1702032	y	1	NA	1923	none	illit	none	none	TRUE	NA	y	y	NA	NA	y	NA	y	NA	n	n	NA	NA	FALSE	TRUE	11	NA	1939	TRUE	5
N	Hebei	1701+1702	1702033	n	0	0	1935	none	illit	none	none	NA	NA	y	y	NA	3	NA	NA	NA	NA	n	n	NA	NA	FALSE	FALSE	NA	n	1955	NA	NA
N	Hebei	1701+1702	1702034	n	0	0	1935	some	illit	none	none	TRUE	TRUE	y	y	y	4	y	y	n	y	y	n	NA	NA	TRUE	TRUE	7	y	1956	NA	14
N	Hebei	1701+1702	1702035	n	0	0	1932	none	illit	none	none	TRUE	TRUE	y	y	y	4	y	y	n	y	y	n	NA	NA	TRUE	TRUE	12	n	1954	NA	10
N	Hebei	1701+1702	1702036	n	0	0	1932	none	illit	none	some	TRUE	TRUE	y	y	y	4	y	y	n	n	y	n	NA	NA	FALSE	TRUE	13	y	1953	NA	8
N	Hebei	1701+1702	1702037	y	1	1	1925	none	illit	none	none	TRUE	FALSE	n	y	NA	4	y	n	y	n	y	n	NA	NA	FALSE	TRUE	NA	n	1947	TRUE	NA
N	Hebei	1701+1702	1702038	n	0	0	1929	none	illit	none	none	TRUE	TRUE	y	y	n	3	y	y	y	n	y	n	NA	NA	FALSE	TRUE	8	y	1949	NA	12
N	Hebei	1701+1702	1702039	n	0	0	1924	some	half	none	none	TRUE	TRUE	n	y	n	3	y	y	n	n	n	n	NA	NA	FALSE	FALSE	13	n	1941	NA	4
N	Hebei	1701+1702	1702040	n	0	0	1930	none	illit	none	none	TRUE	TRUE	n	y	y	3	y	y	y	n	y	n	NA	NA	FALSE	TRUE	8	n	1951	NA	13
N	Hebei	1701+1702	1702041	n	0	0	1934	none	illit	none	none	TRUE	TRUE	y	y	n	4	y	y	n	n	y	n	NA	NA	FALSE	TRUE	13	n	1957	NA	10
N	Hebei	1701+1702	1702042	n	0	0	1931	none	NA	none	NA	TRUE	TRUE	y	y	NA	4	n	y	n	y	y	n	NA	NA	TRUE	TRUE	12	y	1954	NA	11
N	Hebei	1701+1702	1702043	n	0	0	1938	none	NA	none	none	TRUE	TRUE	y	n	NA	3	n	y	n	n	y	n	NA	NA	FALSE	TRUE	12.5	y	1960	NA	9.5
N	Hebei	1701+1702	1702044	n	0	0	1929	none	NA	none	none	TRUE	TRUE	y	n	NA	4	n	y	n	n	y	n	NA	NA	FALSE	TRUE	12.5	y	1951	NA	9.5
N	Hebei	1701+1702	1702045	n	0	0	1930	none	NA	none	none	TRUE	TRUE	n	y	NA	3	n	y	n	y	y	n	NA	NA	TRUE	TRUE	11.5	y	1953	NA	11.5
N	Hebei	1701+1702	1702046	n	0	0	1934	none	NA	none	none	TRUE	FALSE	y	n	NA	NA	n	n	n	n	y	n	NA	NA	FALSE	TRUE	NA	n	1955	NA	NA
N	Hebei	1701+1702	1702047	n	0	0	1929	none	NA	none	none	TRUE	FALSE	y	NA	NA	0	n	n	n	n	y	n	NA	NA	FALSE	TRUE	NA	n	1950	NA	NA
N	Hebei	1701+1702	1702048	n	0	0	1928	some	NA	NA	NA	TRUE	TRUE	n	y	NA	4	n	y	n	y	y	n	NA	NA	TRUE	TRUE	12.5	y	1949	NA	8.5
N	Hebei	1701+1702	1702049	n	0	0	1931	some	NA	NA	some	TRUE	TRUE	y	y	NA	NA	n	y	n	n	y	n	NA	NA	FALSE	TRUE	NA	y	1953	NA	NA
N	Hebei	1701+1702	1702050	n	0	0	1933	none	NA	none	none	TRUE	TRUE	y	y	NA	4	n	y	n	n	y	n	NA	NA	FALSE	TRUE	14.5	y	1954	NA	6.5
N	Hebei	1701+1702	1702051	n	0	0	1934	none	NA	none	none	TRUE	TRUE	y	NA	NA	NA	y	y	n	n	y	n	NA	NA	FALSE	TRUE	16.5	n	1955	NA	4.5
N	Hebei	1701+1702	1702052	n	0	0	1929	none	NA	none	none	TRUE	FALSE	n	n	NA	1	n	n	n	n	y	n	NA	NA	FALSE	TRUE	NA	n	1951	NA	NA
N	Hebei	1701+1702	1702053	n	0	0	1925	none	NA	none	NA	TRUE	TRUE	n	y	NA	NA	n	y	n	y	y	n	NA	NA	TRUE	TRUE	14.5	y	1942	NA	2.5
N	Hebei	1701+1702	1702054	n	0	0	1931	none	NA	none	none	TRUE	NA	y	y	NA	3	n	y	n	n	y	NA	NA	NA	FALSE	TRUE	NA	n	1949	NA	NA
N	Hebei	1701+1702	1702055	y	1	1	1922	none	NA	none	none	NA	NA	n	NA	y	3	n	n	NA	NA	NA	NA	NA	NA	FALSE	FALSE	NA	n	1940	TRUE	NA
N	Hebei	1701+1702	1702056	n	0	0	1934	none	illit	none	none	NA	NA	n	NA	NA	4	NA	y	NA	NA	NA	y	NA	NA	TRUE	FALSE	NA	n	1956	NA	NA
N	Hebei	1701+1702	1702057	n	0	0	1924	none	illit	none	none	NA	NA	y	NA	NA	NA	y	NA	NA	NA	n	n	NA	NA	FALSE	FALSE	NA	NA	1941	NA	NA
N	Hebei	1701+1702	1702058	n	0	0	1932	some	lit	NA	none	NA	NA	n	y	NA	NA	n	n	NA	NA	n	n	NA	NA	FALSE	FALSE	NA	NA	1951	NA	NA
N	Hebei	1701+1702	1702059	y	1	NA	1921	none	illit	none	none	TRUE	TRUE	n	NA	y	4	n	y	y	y	y	n	NA	NA	TRUE	TRUE	6.5	y	1939	TRUE	11.5
N	Hebei	1701+1702	1702060	n	0	0	1929	none	illit	none	none	TRUE	TRUE	y	y	NA	3	y	y	n	n	y	y	NA	NA	TRUE	TRUE	13	n	1950	NA	8
N	Hebei	1701+1702	1702061	n	0	0	1932	some	NA	some	NA	TRUE	TRUE	y	y	NA	3	y	y	n	y	y	n	NA	0.2	TRUE	TRUE	12.5	n	1958	NA	13.5
N	Hebei	1701+1702	1702062	n	0	0	1929	none	illit	none	none	TRUE	TRUE	y	n	NA	3	n	y	n	n	y	y	NA	NA	TRUE	TRUE	15.5	n	1948	NA	3.5
N	Hebei	1701+1702	1702063	y	1	NA	1922	some	lit	none	NA	TRUE	FALSE	y	y	y	4	y	n	y	n	y	n	NA	NA	FALSE	TRUE	9	y	1941	TRUE	10
N	Henan	1901	1901003	n	0	0	1928	none	half	none	none	NA	TRUE	n	NA	n	3	NA	y	y	y	y	y	NA	NA	TRUE	TRUE	NA	n	1947	NA	NA
N	Henan	1901	1901004	y	1	NA	1935	none	illit	none	none	TRUE	NA	y	y	n	4	y	y	y	NA	y	n	NA	NA	FALSE	TRUE	9	y	1952	TRUE	8
N	Henan	1901	1901005	y	1	NA	1927	none	half	none	none	TRUE	NA	y	y	y	4	y	NA	y	NA	y	y	NA	NA	TRUE	TRUE	12	n	1948	TRUE	9
N	Henan	1901	1901006	n	0	0	1930	none	illit	none	none	NA	NA	n	y	y	3	y	NA	NA	NA	n	n	NA	NA	FALSE	FALSE	10	y	1948	NA	8
N	Henan	1901	1901007	y	1	1	1935	none	illit	none	none	NA	NA	y	y	y	2	y	NA	NA	y	y	y	NA	NA	TRUE	TRUE	11	y	1955	TRUE	9
N	Henan	1901	1901008	n	0	0	1931	none	illit	none	none	NA	NA	y	n	y	1	NA	y	NA	NA	n	y	NA	NA	TRUE	FALSE	NA	n	1948	NA	NA
N	Henan	1901	1901009	n	0	0	1936	none	illit	none	none	NA	NA	y	y	y	2	y	NA	NA	NA	y	n	NA	NA	FALSE	TRUE	14	n	1952	NA	2
N	Henan	1901	1901010	n	0	0	1936	none	lit	none	none	NA	NA	y	y	y	1	NA	NA	NA	NA	n	n	NA	NA	FALSE	FALSE	17	n	1953	NA	0
N	Henan	1901	1901011	y	1	1	1935	none	half	none	none	NA	NA	y	y	NA	3	y	NA	NA	NA	n	y	NA	0.38	TRUE	FALSE	11	n	1954	TRUE	8
N	Henan	1901	1901012	y	1	1	1930	none	illit	none	none	TRUE	NA	y	y	y	4	y	NA	y	NA	y	n	NA	NA	FALSE	TRUE	13	n	1949	TRUE	6
N	Henan	1901	1901014	y	1	1	1928	none	illit	NA	NA	NA	NA	y	n	n	3	y	NA	NA	NA	n	n	NA	NA	FALSE	FALSE	12	y	1946	TRUE	6
N	Henan	1901	1901016	y	1	1	1919	none	illit	none	none	TRUE	TRUE	n	y	n	3	y	y	y	y	y	n	NA	NA	TRUE	TRUE	10	y	1938	TRUE	9
N	Henan	1901	1901017	n	0	0	1939	none	illit	none	none	TRUE	NA	y	y	n	4	y	NA	y	NA	n	n	NA	NA	FALSE	TRUE	11.5	n	1959	NA	8.5
N	Henan	1901	1901018	y	1	NA	1929	none	illit	none	none	TRUE	NA	y	y	y	4	y	NA	y	NA	y	n	NA	NA	FALSE	TRUE	15.5	y	1948	TRUE	3.5
N	Henan	1901	1901019	n	0	0	1934	none	illit	none	none	TRUE	NA	y	y	y	1	y	NA	y	NA	n	n	NA	NA	FALSE	TRUE	18	n	1962	NA	10
N	Henan	1901	1901020	y	1	NA	1918	none	illit	none	none	TRUE	NA	n	y	y	3	y	NA	y	y	y	y	NA	NA	TRUE	TRUE	13.5	n	1936	TRUE	4.5
N	Henan	1901	1901021	NA	NA	NA	1926	none	illit	none	none	NA	NA	n	NA	NA	2	NA	NA	NA	NA	n	n	NA	NA	FALSE	FALSE	NA	y	1941	NA	NA
N	Henan	1901	1901022	y	1	NA	1918	none	illit	none	none	NA	NA	y	y	y	4	NA	NA	NA	NA	n	n	NA	NA	FALSE	FALSE	NA	n	1938	TRUE	NA
N	Henan	1901	1901023	y	1	1	1920	none	illit	none	none	TRUE	NA	y	y	y	4	y	NA	y	NA	n	n	NA	NA	FALSE	TRUE	12.5	n	1941	TRUE	8.5
N	Henan	1901	1901024	y	1	NA	1923	none	illit	none	none	NA	NA	y	y	y	3	y	NA	NA	NA	y	n	NA	NA	FALSE	TRUE	15	n	1946	TRUE	8
N	Henan	1901	1901025	n	0	0	1926	none	illit	none	none	NA	NA	y	y	n	4	y	NA	NA	NA	y	n	NA	NA	FALSE	TRUE	11	n	1942	NA	5
N	Henan	1901	1901026	n	0	0	1934	none	illit	none	some	TRUE	NA	y	y	y	4	y	NA	y	NA	y	n	NA	0.5	FALSE	TRUE	11.5	y	1955	NA	9.5
N	Henan	1901	1901027	y	1	NA	1939	none	illit	none	none	NA	NA	y	y	y	4	NA	NA	NA	NA	n	n	NA	NA	FALSE	FALSE	NA	n	1956	TRUE	NA
N	Henan	1901	1901028	n	0	0	1933	none	illit	none	none	TRUE	NA	y	y	y	4	y	NA	y	NA	y	n	NA	0.13	FALSE	TRUE	15.5	n	1951	NA	2.5
N	Henan	1901	1901029	y	1	1	1928	none	illit	none	none	NA	NA	y	y	y	3	y	NA	NA	NA	y	n	NA	0.28	FALSE	TRUE	18.5	n	1950	TRUE	3.5
N	Henan	1901	1901031	y	1	1	1926	none	illit	none	none	NA	NA	n	y	n	3	NA	NA	NA	NA	n	n	NA	NA	FALSE	FALSE	NA	n	1943	TRUE	NA
N	Henan	1901	1901032	n	0	0	1934	none	illit	none	none	TRUE	NA	y	y	y	4	y	NA	y	NA	y	n	NA	NA	FALSE	TRUE	12	y	1954	NA	8
N	Henan	1901	1901033	y	1	NA	1916	none	illit	none	none	TRUE	NA	y	y	y	4	y	NA	y	y	y	y	NA	NA	TRUE	TRUE	12	n	1941	TRUE	13
N	Henan	1901	1901037	y	1	NA	1930	some	half	none	NA	TRUE	NA	n	y	y	4	y	NA	y	NA	n	n	NA	NA	FALSE	TRUE	13.5	y	1947	TRUE	3.5
N	Henan	1901	1901038	n	0	0	1932	none	illit	none	some	NA	NA	y	n	n	3	NA	NA	NA	NA	n	n	NA	NA	FALSE	FALSE	NA	n	1949	NA	NA
N	Henan	1901	1901039	y	1	NA	1935	none	illit	none	none	NA	NA	y	y	n	3	NA	NA	NA	NA	n	n	NA	NA	FALSE	FALSE	NA	n	1951	TRUE	NA
N	Henan	1901	1901040	y	1	NA	1937	none	illit	none	NA	TRUE	NA	y	y	n	4	y	y	y	NA	y	y	NA	NA	TRUE	TRUE	12.5	n	1956	TRUE	6.5
N	Henan	1901	1901041	y	1	1	1930	none	illit	NA	NA	TRUE	NA	y	NA	n	4	y	NA	y	NA	n	n	NA	0.13	FALSE	TRUE	11	y	1949	TRUE	8
N	Henan	1901	1901042	n	0	0	1940	some	illit	none	NA	TRUE	NA	y	y	n	NA	y	NA	y	NA	y	n	NA	NA	FALSE	TRUE	16	y	1960	NA	4
N	Henan	1901	1901043	y	1	1	1927	none	illit	none	NA	TRUE	NA	n	y	y	4	y	NA	y	NA	y	n	NA	NA	FALSE	TRUE	17	y	1945	TRUE	1
N	Henan	1901	1901044	n	0	0	1929	none	illit	none	some	NA	NA	y	y	y	3	y	NA	y	NA	NA	NA	NA	0.22	FALSE	TRUE	13.5	y	1949	NA	6.5
N	Henan	1901	1901045	y	1	NA	1929	none	illit	none	none	TRUE	TRUE	y	y	y	4	y	y	y	y	y	n	NA	NA	TRUE	TRUE	7.5	n	1948	TRUE	11.5
N	Henan	1901	1901046	y	1	1	1935	none	illit	none	none	TRUE	NA	y	y	y	4	y	NA	y	NA	y	n	NA	NA	FALSE	TRUE	17	y	1954	TRUE	2
N	Henan	1901	1901047	n	0	0	1931	none	illit	none	none	TRUE	NA	y	y	y	4	y	NA	y	NA	y	n	NA	NA	FALSE	TRUE	11	y	1951	NA	9
N	Henan	1901	1901048	y	1	NA	1929	none	illit	none	none	NA	NA	y	y	y	0	n	n	NA	NA	y	NA	NA	NA	FALSE	TRUE	NA	n	1947	TRUE	NA
N	Henan	1901	1901049	n	0	0	1942	some	lit	none	none	NA	NA	n	y	y	4	NA	n	y	NA	n	n	NA	NA	FALSE	TRUE	25	n	1962	NA	-5
N	Henan	1901	1901052	n	0	0	1935	some	lit	none	some	TRUE	NA	n	y	y	4	y	NA	y	NA	y	n	NA	NA	FALSE	TRUE	17	n	1956	NA	4
N	Henan	1901	1901053	n	0	0	1942	some	lit	none	none	NA	NA	n	y	y	1	NA	NA	NA	NA	n	n	NA	NA	FALSE	FALSE	NA	n	1962	NA	NA
N	Henan	1901	1901054	n	0	0	1940	some	lit	none	none	NA	NA	y	y	y	4	y	NA	NA	NA	y	n	NA	NA	FALSE	TRUE	13	n	1961	NA	8
N	Henan	1901	1901055	y	1	1	1927	none	illit	none	none	NA	NA	n	y	n	4	NA	NA	NA	NA	n	n	NA	NA	FALSE	FALSE	NA	n	1945	TRUE	NA
N	Henan	1901	1901058	n	0	0	1917	none	illit	none	none	NA	NA	y	y	y	3	y	NA	NA	NA	n	n	NA	NA	FALSE	FALSE	11.5	n	1937	NA	8.5
N	Henan	1901	1901059	y	1	1	1930	none	illit	none	none	TRUE	NA	n	y	n	4	y	NA	y	NA	n	n	NA	NA	FALSE	TRUE	11.5	n	1949	TRUE	7.5
N	Henan	1901	1901060	n	0	0	1930	none	illit	NA	some	TRUE	NA	y	y	NA	3	y	NA	y	NA	n	n	NA	NA	FALSE	TRUE	11	n	1948	NA	7
N	Henan	1901	1901061	y	1	1	1926	none	illit	none	none	TRUE	NA	y	y	y	4	y	NA	y	NA	y	n	NA	NA	FALSE	TRUE	13	y	1946	TRUE	7
N	Henan	1901	1901062	y	1	NA	1926	none	illit	none	none	NA	NA	y	y	y	4	NA	NA	NA	NA	n	n	NA	NA	FALSE	FALSE	15	n	1946	TRUE	5
N	Henan	1901	1901063	n	0	0	1931	none	illit	some	some	TRUE	NA	y	y	n	4	y	NA	y	y	y	n	NA	NA	TRUE	TRUE	7	n	1953	NA	15
N	Henan	1901	1901064	n	0	0	1937	some	half	none	none	NA	NA	y	y	y	4	y	NA	NA	NA	y	n	NA	NA	FALSE	TRUE	17.5	n	1958	NA	3.5
N	Henan	1901	1901066	n	0	0	1937	none	illit	none	none	TRUE	NA	y	y	y	4	y	y	y	NA	n	n	NA	NA	FALSE	TRUE	NA	y	1956	NA	NA
N	Henan	1901	1901067	y	1	1	1927	none	illit	none	none	TRUE	NA	n	y	n	4	y	NA	y	NA	n	n	NA	NA	FALSE	TRUE	14.5	n	1944	TRUE	2.5
N	Henan	1901	1901068	y	1	1	1929	none	illit	none	some	NA	TRUE	y	y	y	4	y	y	NA	y	n	y	NA	NA	TRUE	FALSE	7	n	1948	TRUE	12
N	Henan	1901	1901069	NA	NA	NA	1930	none	illit	none	none	NA	NA	y	NA	y	3	y	NA	NA	NA	y	n	NA	NA	FALSE	TRUE	7	n	1949	NA	12
N	Henan	1901	1901070	n	0	0	1927	none	illit	none	none	NA	NA	NA	y	y	1	n	n	NA	NA	n	n	NA	NA	FALSE	FALSE	NA	n	1945	NA	NA
N	Henan	1901	1901071	y	1	1	1937	none	illit	none	none	NA	NA	y	y	NA	4	n	n	NA	NA	n	n	NA	NA	FALSE	FALSE	NA	n	1955	TRUE	NA
N	Henan	1901	1901074	y	1	1	1930	none	illit	none	none	NA	NA	y	y	y	4	y	NA	NA	NA	n	n	NA	NA	FALSE	FALSE	5	n	1948	TRUE	13
N	Henan	1901	1901075	n	0	0	1937	none	illit	none	none	TRUE	NA	y	y	y	3	y	NA	y	NA	y	n	NA	NA	FALSE	TRUE	15	n	1956	NA	4
N	Henan	1901	1901077	n	0	0	1937	some	lit	none	none	NA	NA	y	NA	n	3	NA	NA	NA	NA	y	n	NA	NA	FALSE	TRUE	NA	n	1957	NA	NA
N	Henan	1901	1901078	y	1	1	1934	none	half	none	none	TRUE	NA	y	y	y	3	y	NA	y	NA	n	n	NA	NA	FALSE	TRUE	14.5	y	1950	TRUE	1.5
N	Henan	1901	1901079	n	0	0	1935	none	illit	none	none	TRUE	NA	n	y	y	3	y	NA	y	NA	y	n	NA	NA	FALSE	TRUE	11	n	1955	NA	9
N	Henan	1901	1901080	y	1	NA	1930	none	illit	none	none	NA	NA	y	y	y	3	NA	NA	NA	NA	n	n	NA	NA	FALSE	FALSE	NA	n	1950	TRUE	NA
N	Henan	1901	1901081	y	1	NA	1927	none	illit	none	NA	TRUE	TRUE	y	y	y	4	y	n	y	n	y	y	NA	NA	TRUE	TRUE	14	y	1948	TRUE	7
N	Henan	1901	1901082	y	1	1	1929	none	illit	none	none	TRUE	NA	n	y	y	4	y	NA	y	NA	n	n	NA	NA	FALSE	TRUE	11.5	y	1946	TRUE	5.5
N	Henan	1901	1901084	y	1	1	1929	none	illit	none	none	TRUE	NA	y	y	y	4	y	NA	y	NA	n	n	NA	NA	FALSE	TRUE	12.5	y	1948	TRUE	6.5
N	Henan	1901	1901086	y	1	1	1917	none	illit	none	none	NA	NA	y	y	y	3	y	y	NA	NA	n	n	NA	NA	FALSE	FALSE	10	n	1939	TRUE	12
N	Henan	1901	1901087	n	0	0	1931	none	illit	none	none	NA	NA	NA	NA	n	0	NA	NA	NA	NA	n	n	NA	NA	FALSE	FALSE	NA	n	1947	NA	NA
N	Henan	1901	1901088	y	1	NA	1934	none	illit	none	none	TRUE	NA	y	y	y	4	y	NA	y	y	y	y	NA	NA	TRUE	TRUE	7.5	n	1952	TRUE	10.5
N	Henan	1901	1901089	n	0	0	1925	none	illit	none	none	NA	NA	y	n	y	4	NA	NA	NA	NA	n	y	NA	NA	TRUE	FALSE	NA	y	1945	NA	NA
N	Henan	1901	1901090	y	1	1	1927	none	illit	none	none	TRUE	NA	y	y	y	3	y	NA	y	NA	y	y	NA	NA	TRUE	TRUE	17	y	1949	TRUE	5
N	Henan	1901	1901091	y	1	1	1931	none	illit	none	none	NA	NA	y	y	n	3	NA	NA	NA	NA	y	y	NA	NA	TRUE	TRUE	18	n	1949	TRUE	0
N	Henan	1901	1901092	y	1	1	1932	none	illit	none	some	TRUE	NA	y	y	n	4	y	NA	y	NA	y	y	NA	NA	TRUE	TRUE	13.5	n	1951	TRUE	5.5
N	Henan	1901	1901093	n	0	0	1938	some	lit	none	none	NA	NA	y	y	n	3	NA	NA	NA	NA	y	y	NA	NA	TRUE	TRUE	NA	n	1959	NA	NA
N	Henan	1901	1901094	y	1	1	1923	none	illit	none	none	TRUE	NA	y	y	y	3	y	NA	y	NA	y	y	NA	0.09	TRUE	TRUE	7.5	y	1941	TRUE	10.5
N	Henan	1901	1901095	n	0	0	1927	none	illit	none	none	NA	NA	y	n	y	1	y	NA	NA	NA	n	n	NA	NA	FALSE	FALSE	NA	n	1946	NA	NA
N	Henan	1901	1901096	n	0	0	1942	some	lit	none	none	TRUE	NA	y	y	y	4	y	NA	y	NA	n	n	NA	NA	FALSE	TRUE	11.5	n	1966	NA	12.5
N	Henan	1901	1901097	y	1	1	1918	none	illit	none	none	TRUE	NA	y	NA	y	4	y	NA	y	NA	n	n	NA	NA	FALSE	TRUE	8.5	y	1935	TRUE	8.5
N	Henan	1901	1901098	y	1	NA	1924	none	illit	none	none	NA	NA	y	y	y	4	y	NA	NA	NA	n	n	NA	NA	FALSE	FALSE	11.5	n	1942	TRUE	6.5
N	Henan	1901	1901099	y	1	1	1923	none	illit	none	none	NA	NA	n	y	y	3	y	NA	NA	NA	NA	NA	NA	NA	FALSE	FALSE	12.5	n	1940	TRUE	4.5
N	Henan	1901	1901100	y	1	1	1920	none	illit	none	none	TRUE	NA	y	y	y	4	y	NA	y	NA	n	n	NA	0.5	FALSE	TRUE	5.5	y	1938	TRUE	12.5
N	Henan	1902	1902001	y	1	NA	1941	some	lit	none	none	TRUE	TRUE	y	y	y	4	y	y	n	n	y	n	NA	NA	FALSE	TRUE	11	n	1966	NA	14
N	Henan	1902	1902002	y	1	1	1924	some	lit	NA	NA	FALSE	TRUE	n	y	y	1	n	n	n	n	n	y	NA	NA	TRUE	FALSE	NA	n	1942	TRUE	NA
N	Henan	1902	1902003	n	0	0	1938	none	half	none	none	TRUE	TRUE	y	y	y	3	y	n	y	n	y	y	NA	NA	TRUE	TRUE	7	n	1956	NA	11
N	Henan	1902	1902004	n	0	0	1935	none	illit	none	none	TRUE	TRUE	y	y	y	4	y	n	n	y	y	n	NA	NA	TRUE	TRUE	11.5	y	1957	NA	10.5
N	Henan	1902	1902005	y	1	1	1922	none	illit	none	none	TRUE	TRUE	y	y	y	2	n	y	n	n	y	y	NA	NA	TRUE	TRUE	NA	n	1939	TRUE	NA
N	Henan	1902	1902006	y	1	1	1923	none	illit	none	none	TRUE	FALSE	y	y	y	3	y	n	y	n	y	n	NA	NA	FALSE	TRUE	12.5	n	1941	TRUE	5.5
N	Henan	1902	1902007	n	0	0	1938	none	illit	none	none	TRUE	FALSE	y	y	y	4	y	n	n	n	y	n	NA	NA	FALSE	TRUE	12.5	y	1957	NA	6.5
N	Henan	1902	1902009	y	1	1	1924	none	illit	none	none	TRUE	FALSE	n	y	y	1	n	n	n	n	y	n	NA	NA	FALSE	TRUE	16	n	1940	TRUE	0
N	Henan	1902	1902011	y	1	1	1924	none	illit	none	none	TRUE	FALSE	n	y	n	1	n	n	n	n	y	n	NA	NA	FALSE	TRUE	NA	n	1944	TRUE	NA
N	Henan	1902	1902012	y	1	NA	1942	none	illit	none	none	NA	NA	NA	y	NA	4	y	n	n	n	NA	NA	NA	NA	FALSE	FALSE	12.5	n	1964	TRUE	9.5
N	Henan	1902	1902013	y	1	NA	1935	none	illit	none	none	TRUE	TRUE	y	y	NA	4	y	n	n	n	y	y	NA	NA	TRUE	TRUE	14	n	1956	TRUE	7
N	Henan	1902	1902014	y	1	NA	1917	none	illit	none	none	TRUE	TRUE	y	y	n	3	y	y	n	n	y	y	NA	NA	TRUE	TRUE	NA	y	1936	NA	NA
N	Henan	1902	1902016	y	1	NA	1936	none	illit	none	none	FALSE	TRUE	y	y	NA	4	n	n	n	n	n	y	NA	NA	TRUE	FALSE	NA	n	1957	NA	NA
N	Henan	1902	1902018	y	1	1	1935	none	illit	none	none	TRUE	FALSE	n	y	NA	4	y	n	n	n	n	n	NA	NA	FALSE	FALSE	15	y	1958	TRUE	8
N	Henan	1902	1902020	y	1	NA	1930	none	illit	none	none	TRUE	NA	y	y	y	1	n	n	n	n	y	NA	NA	NA	FALSE	TRUE	NA	n	1946	TRUE	NA
N	Henan	1902	1902021	y	1	NA	1934	none	illit	none	none	TRUE	FALSE	y	y	n	4	n	n	n	n	y	n	NA	NA	FALSE	TRUE	NA	n	1954	TRUE	NA
N	Henan	1902	1902022	n	0	0	1923	none	illit	none	none	FALSE	FALSE	n	y	n	1	n	n	n	n	n	n	NA	NA	FALSE	FALSE	NA	n	1942	NA	NA
N	Henan	1902	1902023	y	1	1	1926	none	illit	none	none	TRUE	FALSE	y	y	y	4	y	n	n	n	y	n	NA	NA	FALSE	TRUE	16.5	n	1944	TRUE	1.5
N	Henan	1902	1902024	y	1	NA	1930	none	illit	none	none	FALSE	FALSE	n	y	n	1	n	n	n	n	n	n	NA	NA	FALSE	FALSE	NA	n	1946	TRUE	NA
N	Henan	1902	1902025	y	1	1	1922	none	illit	none	none	TRUE	FALSE	y	y	y	2	n	n	n	n	y	n	NA	NA	FALSE	TRUE	NA	n	1940	TRUE	NA
N	Henan	1902	1902026	y	1	1	1923	none	illit	none	none	TRUE	FALSE	y	y	y	4	y	n	n	n	y	n	NA	NA	FALSE	TRUE	NA	y	1945	TRUE	NA
N	Henan	1902	1902027	y	1	NA	1926	none	illit	none	none	TRUE	FALSE	y	y	n	1	y	n	n	n	y	n	NA	NA	FALSE	TRUE	12	y	1943	TRUE	5
N	Henan	1902	1902029	y	1	1	1934	none	illit	none	none	TRUE	FALSE	y	y	y	1	n	n	n	n	y	n	NA	NA	FALSE	TRUE	NA	n	1956	TRUE	NA
N	Henan	1902	1902030	y	1	NA	1936	none	illit	none	none	TRUE	FALSE	y	y	NA	3	n	n	n	n	y	n	NA	NA	FALSE	TRUE	NA	n	1955	NA	NA
N	Henan	1902	1902035	n	0	0	1942	none	illit	none	none	FALSE	TRUE	y	y	y	0	n	n	n	n	n	y	NA	NA	TRUE	FALSE	NA	n	1962	NA	NA
N	Henan	1902	1902036	y	1	1	1934	none	illit	none	none	NA	NA	y	y	n	3	NA	NA	n	n	n	y	NA	NA	TRUE	FALSE	NA	n	1953	TRUE	NA
N	Henan	1902	1902037	y	1	1	1936	none	illit	none	none	FALSE	FALSE	y	y	n	3	n	n	n	n	n	n	NA	NA	FALSE	FALSE	NA	n	1955	TRUE	NA
N	Henan	1902	1902038	n	0	0	1941	none	illit	none	none	TRUE	FALSE	y	y	y	4	y	n	n	n	n	n	NA	NA	FALSE	FALSE	11	y	1959	NA	7
N	Henan	1902	1902039	n	0	0	1938	none	illit	NA	NA	FALSE	FALSE	y	y	n	3	n	n	n	n	n	n	NA	NA	FALSE	FALSE	NA	n	1958	NA	NA
N	Henan	1902	1902040	y	1	NA	1916	none	illit	none	none	FALSE	TRUE	y	y	n	2	n	n	n	n	n	y	NA	NA	TRUE	FALSE	NA	n	1938	TRUE	NA
N	Henan	1902	1902041	n	0	0	1933	none	illit	none	none	FALSE	TRUE	y	y	y	1	n	n	n	n	n	y	NA	NA	TRUE	FALSE	NA	n	1950	NA	NA
N	Henan	1902	1902042	y	1	1	1930	none	illit	none	some	FALSE	TRUE	NA	y	y	3	n	y	n	n	n	y	NA	NA	TRUE	FALSE	12	n	1947	TRUE	5
N	Henan	1902	1902043	y	1	1	1927	none	illit	none	none	TRUE	FALSE	y	y	y	4	y	n	n	n	n	n	NA	NA	FALSE	FALSE	11.5	n	1947	TRUE	8.5
N	Henan	1902	1902044	y	1	1	1923	none	illit	none	none	TRUE	FALSE	y	y	y	0	y	n	n	n	y	n	NA	NA	FALSE	TRUE	9	n	1940	TRUE	8
N	Henan	1902	1902045	y	1	NA	1919	none	illit	none	none	TRUE	FALSE	y	y	n	4	y	n	n	n	y	n	NA	NA	FALSE	TRUE	NA	y	1939	TRUE	NA
N	Henan	1902	1902046	y	1	1	1930	none	illit	none	none	TRUE	FALSE	n	y	n	4	y	n	n	n	n	n	NA	NA	FALSE	FALSE	13.5	n	1947	TRUE	3.5
N	Henan	1902	1902049	y	1	NA	1939	none	illit	none	some	TRUE	TRUE	y	y	y	1	n	y	n	n	y	n	NA	NA	FALSE	TRUE	12.5	n	1959	TRUE	7.5
N	Henan	1902	1902050	y	1	1	1932	none	illit	none	none	TRUE	TRUE	y	y	n	4	n	y	n	n	y	n	NA	NA	FALSE	TRUE	8.5	n	1950	TRUE	9.5
N	Henan	1902	1902051	y	1	1	1925	none	illit	none	none	NA	NA	y	y	n	4	NA	NA	n	n	y	n	NA	NA	FALSE	TRUE	11.5	n	1944	TRUE	7.5
N	Henan	1902	1902052	n	0	0	1938	none	half	none	none	TRUE	FALSE	y	y	n	3	n	n	n	n	y	n	NA	NA	FALSE	TRUE	35	n	1959	NA	-14
N	Henan	1902	1902053	y	1	1	1930	some	half	none	none	TRUE	TRUE	n	y	y	1	n	y	n	n	y	n	NA	0.5	FALSE	TRUE	15.5	n	1950	TRUE	4.5
N	Henan	1902	1902054	y	1	1	1926	none	illit	none	none	TRUE	FALSE	n	y	y	1	n	n	n	n	y	n	NA	NA	FALSE	TRUE	15.5	n	1944	TRUE	2.5
N	Henan	1902	1902055	y	1	1	1930	none	illit	none	none	TRUE	FALSE	y	y	n	4	y	n	n	n	n	n	NA	NA	FALSE	FALSE	12.5	y	1946	TRUE	3.5
N	Henan	1902	1902056	y	1	1	1927	none	illit	none	none	TRUE	TRUE	y	y	NA	2	y	y	n	n	n	y	NA	NA	TRUE	FALSE	11	n	1947	TRUE	9
N	Henan	1902	1902057	y	1	1	1926	none	illit	none	none	TRUE	TRUE	y	y	y	4	y	n	y	y	y	n	NA	NA	TRUE	TRUE	11.5	y	1944	TRUE	6.5
N	Henan	1902	1902058	y	1	NA	1927	none	illit	none	none	TRUE	TRUE	y	y	n	4	y	y	n	n	y	y	NA	0.63	TRUE	TRUE	13.5	n	1953	TRUE	12.5
N	Henan	1902	1902059	y	1	1	1923	none	illit	none	none	TRUE	FALSE	y	y	n	1	n	n	n	n	y	n	NA	NA	FALSE	TRUE	21	y	1944	TRUE	0
N	Henan	1902	1902060	y	1	1	1919	none	illit	none	none	TRUE	FALSE	y	y	n	4	y	n	y	n	y	n	NA	NA	FALSE	TRUE	13.5	y	1942	TRUE	9.5
N	Henan	1902	1902062	y	1	1	1928	none	illit	none	none	NA	NA	y	y	NA	3	n	n	n	n	NA	NA	NA	NA	FALSE	FALSE	NA	n	1950	TRUE	NA
N	Henan	1902	1902063	y	1	1	1938	none	illit	none	none	TRUE	TRUE	y	y	NA	3	y	y	n	n	n	y	NA	NA	TRUE	FALSE	12	n	1957	TRUE	7
N	Henan	1902	1902065	y	1	NA	1913	none	illit	none	none	FALSE	FALSE	n	y	y	0	n	n	n	n	n	n	NA	NA	FALSE	FALSE	NA	n	1931	TRUE	NA
N	Henan	1902	1902066	y	1	1	1916	none	illit	none	none	FALSE	FALSE	n	y	y	1	n	n	n	n	n	n	NA	NA	FALSE	FALSE	NA	n	1936	TRUE	NA
N	Henan	1902	1902068	n	0	0	1936	none	illit	none	none	TRUE	TRUE	y	y	y	2	y	n	n	n	n	y	NA	NA	TRUE	FALSE	NA	n	1960	NA	NA
N	Henan	1902	1902069	y	1	1	1925	none	illit	none	none	TRUE	TRUE	y	y	y	1	y	n	y	n	n	y	NA	NA	TRUE	TRUE	NA	y	1946	TRUE	NA
N	Henan	1902	1902070	y	1	1	1929	none	illit	none	none	FALSE	TRUE	y	y	y	3	n	n	n	n	n	y	NA	NA	TRUE	FALSE	NA	n	1946	TRUE	NA
N	Henan	1902	1902071	y	1	1	1916	none	illit	none	NA	TRUE	TRUE	n	y	n	0	y	n	n	n	n	y	NA	NA	TRUE	FALSE	NA	n	1936	TRUE	NA
N	Henan	1902	1902072	y	1	1	1925	none	illit	none	none	FALSE	TRUE	y	y	y	3	n	y	n	n	n	n	NA	NA	FALSE	FALSE	NA	n	1944	TRUE	NA
N	Henan	1902	1902073	y	1	1	1916	some	illit	none	NA	FALSE	FALSE	n	y	y	0	n	n	n	n	n	n	NA	NA	FALSE	FALSE	NA	n	1934	TRUE	NA
N	Henan	1902	1902074	y	1	1	1930	none	illit	none	some	NA	NA	n	y	y	1	y	y	n	n	NA	NA	NA	NA	FALSE	FALSE	12	n	1947	TRUE	5
N	Henan	1902	1902075	y	1	1	1939	none	illit	none	none	TRUE	FALSE	NA	y	NA	NA	y	n	n	n	n	n	NA	NA	FALSE	FALSE	12	NA	1956	TRUE	5
N	Henan	1902	1902076	y	1	1	1925	none	illit	none	none	FALSE	FALSE	n	y	y	1	n	n	n	n	n	n	NA	NA	FALSE	FALSE	NA	n	1943	TRUE	NA
N	Henan	1902	1902077	y	1	1	1934	none	illit	none	none	TRUE	FALSE	y	y	NA	3	y	n	n	n	n	n	NA	NA	FALSE	FALSE	12	n	1954	TRUE	8
N	Henan	1902	1902078	y	1	NA	1936	none	illit	none	none	TRUE	FALSE	n	y	y	1	n	n	n	n	y	n	NA	NA	FALSE	TRUE	NA	n	1955	TRUE	NA
N	Henan	1902	1902079	y	1	NA	1938	none	illit	none	none	FALSE	FALSE	y	n	y	4	n	n	n	n	n	n	NA	NA	FALSE	FALSE	NA	n	1958	TRUE	NA
N	Henan	1902	1902081	y	1	1	1935	none	illit	none	none	FALSE	FALSE	NA	y	n	4	n	n	n	n	n	n	NA	NA	FALSE	FALSE	NA	n	1954	TRUE	NA
N	Henan	1902	1902082	y	1	1	1928	none	illit	none	none	FALSE	TRUE	y	y	y	4	n	y	n	n	n	n	NA	NA	FALSE	FALSE	13.5	n	1952	TRUE	10.5
N	Henan	1902	1902083	n	0	0	1929	none	illit	none	none	NA	NA	n	NA	y	1	n	n	n	n	NA	NA	NA	NA	FALSE	FALSE	NA	n	1953	NA	NA
N	Henan	1902	1902084	y	1	1	1926	none	illit	none	none	NA	NA	y	y	y	4	n	n	n	n	NA	NA	NA	NA	FALSE	FALSE	NA	n	1946	TRUE	NA
N	Henan	1902	1902085	y	1	1	1925	none	illit	none	none	NA	NA	NA	y	y	4	y	n	n	n	NA	NA	NA	NA	FALSE	FALSE	13.5	y	1950.5	TRUE	12
N	Henan	1902	1902086	y	1	1	1927	none	illit	none	none	NA	TRUE	n	y	y	3	n	n	n	n	NA	y	NA	NA	TRUE	FALSE	NA	n	1944	TRUE	NA
N	Henan	1902	1902087	y	1	1	1939	none	illit	none	none	TRUE	FALSE	y	y	NA	4	y	n	n	n	n	n	NA	NA	FALSE	FALSE	15	y	1958	TRUE	4
N	Henan	1902	1902094	y	1	NA	1938	none	illit	none	none	FALSE	TRUE	y	y	y	1	n	n	n	n	n	y	NA	NA	TRUE	FALSE	NA	n	1956	TRUE	NA
N	Henan	1902	1902095	y	1	1	1926	none	illit	none	some	TRUE	FALSE	y	y	n	4	y	n	n	n	y	n	NA	NA	FALSE	TRUE	11	n	1945	TRUE	8
N	Henan	1902	1902096	y	1	1	1927	some	half	none	none	FALSE	FALSE	n	y	NA	1	n	n	n	n	n	n	NA	NA	FALSE	FALSE	NA	n	1948	TRUE	NA
N	Henan	1902	1902097	y	1	1	1924	none	illit	none	none	FALSE	FALSE	n	y	y	0	n	n	n	n	n	n	NA	NA	FALSE	FALSE	NA	n	1943	TRUE	NA
N	Henan	1902	1902098	y	1	1	1923	none	illit	none	none	FALSE	FALSE	n	y	y	1	n	n	n	n	n	n	NA	NA	FALSE	FALSE	NA	n	1942	TRUE	NA
N	Henan	1902	1902099	y	1	1	1924	none	illit	none	none	TRUE	TRUE	y	y	y	4	y	n	n	n	n	y	NA	NA	TRUE	FALSE	14	n	1945	TRUE	7
N	Henan	1902	1902100	y	1	1	1924	none	illit	none	none	TRUE	TRUE	y	y	n	3	y	n	n	n	n	y	NA	NA	TRUE	FALSE	17	n	1941	TRUE	0
C	Hubei	2001	2001001	y	1	1	1936	none	illit	none	none	TRUE	TRUE	y	y	y	4	y	n	y	n	y	y	NA	0.41	TRUE	TRUE	12	y	1959	TRUE	11
C	Hubei	2001	2001002	y	1	NA	1932	none	illit	none	some	TRUE	TRUE	y	y	n	4	y	y	y	y	y	n	NA	0.28	TRUE	TRUE	7.5	y	1956	TRUE	16.5
C	Hubei	2001	2001003	NA	NA	NA	1938	none	illit	none	NA	TRUE	NA	y	y	n	4	y	y	y	y	y	NA	NA	0.41	TRUE	TRUE	9	y	1955	NA	8
C	Hubei	2001	2001004	y	1	1	1923	NA	half	none	NA	TRUE	TRUE	y	y	n	3	y	y	y	n	y	n	NA	0.25	FALSE	TRUE	11.5	y	1939	TRUE	4.5
C	Hubei	2001	2001006	n	0	0	1929	some	lit	none	none	TRUE	NA	y	y	y	4	y	n	n	n	y	NA	NA	0.19	FALSE	TRUE	7.5	n	1948	NA	11.5
C	Hubei	2001	2001007	n	0	0	1939	none	illit	none	none	TRUE	NA	y	y	y	4	y	n	y	n	y	NA	NA	0.06	FALSE	TRUE	16.5	y	1959	NA	3.5
C	Hubei	2001	2001008	NA	NA	NA	1942	none	illit	none	none	TRUE	FALSE	y	y	NA	4	y	n	y	n	y	n	NA	0.41	FALSE	TRUE	12.5	n	1962	NA	7.5
C	Hubei	2001	2001009	n	0	0	1923	none	illit	none	some	TRUE	TRUE	n	y	y	4	y	y	y	y	y	n	NA	0.22	TRUE	TRUE	12.5	y	1943	NA	7.5
C	Hubei	2001	2001010	y	1	1	1933	some	illit	none	none	NA	NA	y	y	n	1	NA	NA	y	y	y	n	y	NA	TRUE	TRUE	NA	y	1952	TRUE	NA
C	Hubei	2001	2001011	n	0	0	1941	none	illit	none	NA	TRUE	FALSE	y	y	NA	4	y	n	n	n	n	n	NA	0.22	FALSE	FALSE	15.5	n	1958	NA	1.5
C	Hubei	2001	2001012	n	0	0	1940	none	illit	none	none	TRUE	FALSE	y	y	n	4	n	n	n	n	y	n	NA	NA	FALSE	TRUE	NA	n	1959	NA	NA
C	Hubei	2001	2001013	y	1	1	1921	none	illit	none	none	TRUE	TRUE	n	y	n	NA	y	y	y	n	y	y	NA	0.09	TRUE	TRUE	14.5	y	1941	TRUE	5.5
C	Hubei	2001	2001014	y	1	NA	1931	none	illit	none	NA	TRUE	TRUE	y	y	y	4	y	n	y	n	y	y	NA	0.41	TRUE	TRUE	12.5	y	1955	TRUE	11.5
C	Hubei	2001	2001015	n	0	0	1933	none	illit	none	some	NA	NA	y	y	n	4	y	n	n	n	NA	NA	NA	0.25	FALSE	FALSE	14.5	y	1951	NA	3.5
C	Hubei	2001	2001016	y	1	NA	1925	none	illit	none	NA	NA	NA	y	y	n	4	y	n	y	n	NA	NA	NA	0.41	FALSE	TRUE	11.5	y	1949	TRUE	12.5
C	Hubei	2001	2001017	y	1	1	1926	some	half	none	none	TRUE	NA	n	y	n	4	y	y	y	y	y	NA	NA	0.28	TRUE	TRUE	6.5	y	1949	TRUE	16.5
C	Hubei	2001	2001018	y	1	1	1930	none	illit	none	none	TRUE	NA	y	y	n	4	y	y	y	n	y	NA	NA	0.16	FALSE	TRUE	6.5	y	NA	NA	NA
C	Hubei	2001	2001019	y	1	NA	1931	some	lit	none	NA	TRUE	FALSE	y	y	y	3	y	n	y	n	y	n	NA	0.41	FALSE	TRUE	5.5	y	1953	NA	16.5
C	Hubei	2001	2001020	n	0	0	1940	some	lit	none	none	FALSE	TRUE	y	y	y	3	n	y	n	n	n	n	NA	0.22	FALSE	FALSE	8.5	n	1963	NA	14.5
C	Hubei	2001	2001021	y	1	1	1922	none	illit	none	none	TRUE	TRUE	y	y	n	4	y	y	y	y	y	n	NA	0.41	TRUE	TRUE	8.5	y	1942	TRUE	11.5
C	Hubei	2001	2001022	n	0	0	1942	some	lit	none	some	TRUE	FALSE	y	y	n	4	n	n	n	n	y	n	NA	NA	FALSE	TRUE	20	y	1961	NA	-1
C	Hubei	2001	2001023	NA	NA	NA	1925	none	illit	none	none	TRUE	TRUE	y	NA	NA	4	y	y	y	y	y	y	NA	1	TRUE	TRUE	NA	y	1944	NA	NA
C	Hubei	2001	2001025	n	0	0	1936	none	illit	none	NA	TRUE	TRUE	y	y	n	4	y	n	y	y	y	n	NA	0.22	TRUE	TRUE	12.5	n	1956	NA	7.5
C	Hubei	2001	2001026	y	1	NA	1919	none	illit	none	NA	NA	NA	NA	y	NA	NA	NA	NA	NA	NA	NA	NA	NA	NA	FALSE	FALSE	6	NA	1939	NA	14
C	Hubei	2001	2001027	n	0	0	1938	none	illit	none	NA	NA	NA	NA	y	NA	NA	n	n	n	n	NA	NA	NA	NA	FALSE	FALSE	22.5	NA	1956	NA	-4.5
C	Hubei	2001	2001028	n	0	0	1930	none	illit	none	NA	TRUE	FALSE	n	y	y	4	y	n	y	n	y	n	NA	NA	FALSE	TRUE	8	y	1949	NA	11
C	Hubei	2001	2001029	n	0	0	1929	none	illit	none	none	TRUE	NA	y	y	NA	4	y	n	y	n	y	NA	NA	0.41	FALSE	TRUE	12.5	y	1946	NA	4.5
C	Hubei	2001	2001031	n	0	0	1928	none	half	none	none	NA	NA	n	y	y	1	n	n	NA	NA	y	n	NA	NA	FALSE	TRUE	18	n	1946	NA	0
C	Hubei	2001	2001032	y	1	1	1928	none	illit	none	some	TRUE	FALSE	y	y	y	3	y	n	y	n	y	n	NA	0.25	FALSE	TRUE	14.5	n	1951	TRUE	8.5
C	Hubei	2001	2001033	n	0	0	1922	none	illit	none	NA	NA	NA	n	y	y	4	y	y	n	n	NA	NA	NA	1.5	FALSE	FALSE	6.5	n	1937	NA	8.5
C	Hubei	2001	2001034	n	0	0	1933	none	illit	none	NA	TRUE	TRUE	y	y	NA	3	y	y	y	y	y	n	NA	NA	TRUE	TRUE	10	y	1952	NA	9
C	Hubei	2001	2001035	n	0	0	1928	none	illit	none	NA	FALSE	FALSE	n	y	y	2	n	n	n	n	n	n	NA	NA	FALSE	FALSE	NA	n	1948	NA	NA
C	Hubei	2001	2001036	y	1	1	1924	none	illit	none	none	TRUE	FALSE	y	y	NA	4	y	n	y	n	y	n	NA	0.41	FALSE	TRUE	15	y	NA	NA	NA
C	Hubei	2001	2001038	n	0	0	1937	some	half	none	NA	NA	NA	y	y	n	4	NA	NA	n	n	y	y	NA	NA	TRUE	TRUE	19.5	y	1956	NA	-0.5
C	Hubei	2001	2001040	n	0	0	1936	none	illit	none	some	TRUE	TRUE	y	y	y	NA	y	n	y	y	y	n	NA	0.41	TRUE	TRUE	7	y	1952	NA	9
C	Hubei	2001	2001041	y	1	1	1941	some	half	NA	none	TRUE	FALSE	y	NA	y	3	y	n	y	n	y	n	NA	0.25	FALSE	TRUE	7.5	y	1957	TRUE	8.5
C	Hubei	2001	2001042	n	0	0	1937	none	illit	none	some	NA	NA	y	y	y	4	n	n	n	n	NA	NA	NA	NA	FALSE	FALSE	NA	NA	1957	NA	NA
C	Hubei	2001	2001043	n	0	0	1941	none	illit	some	none	FALSE	FALSE	y	y	y	4	n	n	n	n	n	n	NA	NA	FALSE	FALSE	NA	n	1961	NA	NA
C	Hubei	2001	2001044	y	1	NA	1927	none	illit	NA	NA	TRUE	FALSE	NA	y	n	4	y	n	y	n	y	n	NA	0.41	FALSE	TRUE	15.5	y	1948.5	NA	6
C	Hubei	2001	2001045	y	1	1	1928	none	illit	none	none	TRUE	TRUE	y	NA	y	4	y	n	y	y	y	y	NA	NA	TRUE	TRUE	7.5	n	1944	TRUE	8.5
C	Hubei	2001	2001046	y	1	NA	1933	NA	lit	none	some	TRUE	TRUE	y	y	y	4	y	n	y	y	y	n	NA	0.25	TRUE	TRUE	13.5	y	1953	TRUE	6.5
C	Hubei	2001	2001047	y	1	NA	1929	some	lit	NA	NA	TRUE	TRUE	y	y	y	4	y	y	y	y	y	y	NA	0.41	TRUE	TRUE	10	y	1957	TRUE	18
C	Hubei	2001	2001048	n	0	0	1930	none	half	none	NA	TRUE	TRUE	y	y	y	4	y	n	y	y	y	n	NA	0.22	TRUE	TRUE	7	y	1948	NA	11
C	Hubei	2001	2001049	n	0	0	1941	none	illit	none	none	NA	NA	NA	NA	n	NA	NA	NA	NA	NA	NA	NA	NA	NA	FALSE	FALSE	NA	NA	1958	NA	NA
C	Hubei	2001	2001050	n	0	0	1938	none	illit	none	NA	NA	NA	NA	y	n	NA	NA	NA	NA	NA	NA	NA	NA	NA	FALSE	FALSE	NA	NA	1958	NA	NA
C	Hubei	2001	2001051	n	0	0	1939	none	illit	none	none	NA	NA	y	n	NA	3	y	n	y	n	NA	NA	NA	NA	FALSE	TRUE	20	NA	1959	NA	0
C	Hubei	2001	2001052	n	0	0	1939	some	lit	none	none	TRUE	NA	y	y	y	3	y	NA	y	n	y	n	NA	0.41	FALSE	TRUE	19	n	1958	NA	0
C	Hubei	2001	2001053	n	0	0	1937	none	illit	none	none	NA	NA	NA	NA	y	NA	NA	NA	NA	NA	NA	NA	NA	NA	FALSE	FALSE	22	NA	1959	NA	0
C	Hubei	2001	2001054	y	1	NA	1921	none	illit	none	none	NA	NA	NA	y	n	4	n	n	n	n	NA	NA	NA	NA	FALSE	FALSE	14	y	NA	NA	NA
C	Hubei	2001	2001055	n	0	0	1935	none	illit	none	none	TRUE	TRUE	y	y	n	4	y	y	y	y	y	n	NA	0.41	TRUE	TRUE	10	y	1955	NA	10
C	Hubei	2001	2001056	y	1	NA	1930	none	illit	none	NA	TRUE	TRUE	y	y	n	4	y	n	y	y	y	n	NA	0.41	TRUE	TRUE	NA	y	1946	TRUE	NA
C	Hubei	2001	2001057	y	1	NA	1922	none	illit	none	none	NA	NA	y	y	y	NA	NA	NA	NA	NA	NA	NA	NA	NA	FALSE	FALSE	NA	NA	1944	TRUE	NA
C	Hubei	2001	2001059	n	0	0	1935	none	illit	none	none	TRUE	TRUE	n	n	n	3	y	n	y	y	y	n	NA	0.19	TRUE	TRUE	12.5	n	1954	NA	6.5
C	Hubei	2001	2001061	y	1	1	1922	some	lit	none	NA	TRUE	TRUE	n	y	y	3	y	n	y	y	y	n	NA	0.41	TRUE	TRUE	15	y	1946	TRUE	9
C	Hubei	2001	2001062	y	1	NA	1932	none	illit	NA	NA	NA	NA	y	y	y	NA	NA	NA	NA	NA	NA	NA	NA	NA	FALSE	FALSE	NA	NA	1952	TRUE	NA
C	Hubei	2001	2001063	n	0	0	1936	none	illit	none	none	FALSE	FALSE	y	y	n	4	n	n	n	n	n	n	NA	NA	FALSE	FALSE	16	y	1952	NA	0
C	Hubei	2001	2001064	y	1	NA	1934	none	half	none	none	TRUE	FALSE	y	y	y	1	y	n	n	n	y	n	NA	0.56	FALSE	TRUE	11.5	n	1952	TRUE	6.5
C	Hubei	2001	2001065	n	0	0	1941	none	illit	none	NA	FALSE	FALSE	y	y	n	3	n	n	n	n	n	n	NA	NA	FALSE	FALSE	NA	n	1957	NA	NA
C	Hubei	2001	2001066	n	0	0	1930	none	illit	none	none	NA	NA	NA	n	n	NA	NA	NA	NA	NA	NA	NA	NA	NA	FALSE	FALSE	5	NA	1945	NA	10
C	Hubei	2001	2001067	n	0	0	1936	none	illit	none	none	TRUE	TRUE	y	y	n	4	y	y	n	n	y	n	NA	0.34	FALSE	TRUE	18.5	y	1956	NA	1.5
C	Hubei	2001	2001068	y	1	1	1924	none	illit	none	some	NA	NA	y	NA	n	4	y	n	NA	NA	y	n	NA	0.22	FALSE	TRUE	14.5	y	1944	TRUE	5.5
C	Hubei	2001	2001069	n	0	0	1919	none	illit	none	none	TRUE	FALSE	NA	y	y	3	y	n	n	n	y	n	NA	0.28	FALSE	TRUE	14	y	1935	NA	2
C	Hubei	2001	2001070	y	1	1	1922	none	illit	none	none	NA	NA	y	y	y	0	y	y	y	y	NA	NA	NA	0.28	TRUE	TRUE	7.5	n	1944	TRUE	14.5
C	Hubei	2001	2001071	y	1	NA	1926	none	illit	none	none	TRUE	TRUE	n	n	n	4	y	y	y	y	y	n	NA	0.38	TRUE	TRUE	14.5	y	1950	TRUE	9.5
C	Hubei	2001	2001072	n	0	0	1938	none	illit	NA	NA	NA	NA	NA	n	y	NA	NA	NA	NA	NA	NA	NA	NA	NA	FALSE	FALSE	10	NA	1956	NA	8
C	Hubei	2001	2001073	n	0	0	1932	none	illit	none	none	NA	NA	NA	y	y	NA	NA	NA	NA	NA	NA	NA	NA	NA	FALSE	FALSE	12.5	NA	1950	NA	5.5
C	Hubei	2001	2001074	n	0	0	1940	none	illit	none	NA	NA	NA	y	y	y	3	n	n	n	n	NA	NA	NA	NA	FALSE	FALSE	23	n	1960	NA	-3
C	Hubei	2001	2001075	n	0	0	1941	none	illit	none	none	TRUE	FALSE	n	y	y	1	y	n	y	n	y	n	NA	0.41	FALSE	TRUE	17.5	y	1966	NA	7.5
C	Hubei	2001	2001076	y	1	1	1932	none	illit	NA	NA	TRUE	FALSE	y	y	y	4	y	n	y	n	y	n	NA	0.5	FALSE	TRUE	6.5	y	1952	TRUE	13.5
C	Hubei	2001	2001077	y	1	1	1935	none	illit	none	NA	TRUE	TRUE	y	y	n	4	y	n	y	y	y	n	NA	0.5	TRUE	TRUE	10	y	1953	TRUE	8
C	Hubei	2001	2001078	y	1	1	1929	none	illit	none	none	TRUE	NA	NA	y	y	1	y	y	y	y	y	NA	NA	0.19	TRUE	TRUE	7.5	n	1950.5	TRUE	14
C	Hubei	2001	2001079	y	1	NA	1923	none	illit	none	none	TRUE	FALSE	y	y	n	3	y	n	y	n	y	n	NA	0.15	FALSE	TRUE	15.5	y	1941	TRUE	2.5
C	Hubei	2001	2001081	y	1	1	1933	none	illit	none	none	TRUE	FALSE	y	y	n	3	n	n	n	n	y	n	NA	NA	FALSE	TRUE	19	n	1952	TRUE	0
C	Hubei	2001	2001083	y	1	NA	1923	none	half	none	none	TRUE	FALSE	n	y	n	4	n	n	n	n	y	n	NA	NA	FALSE	TRUE	15.5	n	1942	TRUE	3.5
C	Hubei	2001	2001084	y	1	NA	1926	none	illit	none	none	TRUE	NA	y	y	NA	4	n	n	y	n	y	NA	NA	NA	FALSE	TRUE	NA	n	1945	TRUE	NA
C	Hubei	2001	2001085	y	1	1	1938	none	illit	none	none	TRUE	TRUE	y	y	y	3	y	n	y	y	y	y	NA	NA	TRUE	TRUE	12.5	n	1955	TRUE	4.5
C	Hubei	2001	2001086	n	0	0	1939	none	illit	none	none	TRUE	FALSE	y	y	y	NA	y	n	y	n	y	n	NA	0.22	FALSE	TRUE	10	y	1957	NA	8
C	Hubei	2001	2001088	n	0	0	1941	none	illit	none	NA	NA	NA	NA	y	NA	NA	NA	NA	NA	NA	NA	NA	NA	NA	FALSE	FALSE	NA	NA	1959	TRUE	NA
C	Hubei	2001	2001089	y	1	NA	1927	none	illit	none	NA	NA	NA	NA	y	y	1	NA	NA	NA	NA	NA	NA	NA	NA	FALSE	FALSE	15	n	1952	TRUE	10
C	Hubei	2001	2001090	y	1	NA	1927	none	illit	none	some	NA	TRUE	y	y	n	3	y	n	y	n	NA	y	NA	0.28	TRUE	TRUE	15	y	1946	TRUE	4
C	Hubei	2001	2001092	y	1	NA	1930	none	illit	none	some	TRUE	FALSE	NA	y	y	0	y	n	y	n	y	n	NA	0.41	FALSE	TRUE	12	y	1949	TRUE	7
C	Hubei	2001	2001093	n	0	0	1917	none	illit	none	none	TRUE	FALSE	y	NA	n	4	n	n	y	n	y	n	NA	NA	FALSE	TRUE	NA	y	1939	NA	NA
C	Hubei	2001	2001094	n	0	0	1941	none	illit	none	none	TRUE	NA	y	y	y	4	y	n	n	n	y	NA	NA	0.41	FALSE	TRUE	12.5	y	1960	NA	6.5
C	Hubei	2001	2001095	n	0	0	1941	none	illit	none	none	TRUE	FALSE	y	y	y	4	y	n	y	n	y	n	NA	0.22	FALSE	TRUE	10	y	1959	NA	8
C	Hubei	2001	2001096	n	0	0	1939	none	illit	none	NA	TRUE	NA	y	y	y	4	y	y	n	n	y	NA	NA	NA	FALSE	TRUE	14	y	1959	NA	6
C	Hubei	2001	2001097	y	1	1	1933	none	illit	none	some	TRUE	NA	y	y	y	4	y	n	y	y	y	NA	NA	0.5	TRUE	TRUE	12.5	y	1953	TRUE	7.5
C	Hubei	2001	2001098	y	1	NA	1933	none	illit	none	some	TRUE	TRUE	y	y	y	4	y	n	y	y	y	n	NA	0.25	TRUE	TRUE	7.5	y	1953	TRUE	12.5
C	Hubei	2001	2001099	y	1	1	1939	some	NA	none	none	TRUE	TRUE	y	y	y	4	y	n	y	y	y	n	NA	0.13	TRUE	TRUE	11.5	y	1963	TRUE	12.5
C	Hubei	2001	2001100	y	1	NA	1907	none	illit	none	NA	TRUE	FALSE	n	y	y	4	y	n	y	n	y	n	NA	0.41	FALSE	TRUE	12.5	y	1930.5	TRUE	11
C	Hubei	2001	2001101	n	0	0	1924	none	illit	none	none	TRUE	FALSE	y	y	n	0	y	n	y	n	y	n	NA	0.25	FALSE	TRUE	7.5	y	1944	NA	12.5
C	Hubei	2001	2001102	n	0	0	1925	none	illit	none	none	NA	NA	NA	y	y	0	NA	NA	NA	NA	NA	NA	NA	NA	FALSE	FALSE	14	y	1943	NA	4
C	Hubei	2001	2001103	n	0	0	1940	none	illit	none	none	TRUE	TRUE	y	y	y	4	y	n	y	y	n	n	NA	NA	TRUE	TRUE	12.5	y	1958	NA	5.5
C	Hubei	2001	2001104	n	0	0	1934	none	illit	none	none	TRUE	TRUE	y	y	y	NA	y	n	y	y	y	n	NA	0.13	TRUE	TRUE	10	y	1954	NA	10
C	Hubei	2001	2001105	n	0	0	1937	none	illit	none	some	TRUE	FALSE	y	y	y	2	y	n	y	n	y	n	NA	0.06	FALSE	TRUE	11.5	y	1956	NA	7.5
C	Hubei	2001	2001106	y	1	NA	1938	none	NA	none	some	TRUE	TRUE	y	y	y	3	y	n	y	y	y	n	NA	0.41	TRUE	TRUE	12.5	y	1958	TRUE	7.5
C	Hubei	2001	2001107	n	0	0	1942	some	lit	none	some	TRUE	FALSE	y	y	y	4	y	n	y	n	y	n	NA	0.19	FALSE	TRUE	15.5	y	1964	NA	6.5
C	Hubei	2001	2001108	y	1	NA	1923	none	illit	none	NA	NA	NA	NA	y	y	NA	NA	NA	NA	NA	NA	NA	NA	NA	FALSE	FALSE	NA	NA	1943	TRUE	NA
C	Hubei	2001	2001109	y	1	NA	1919	none	illit	none	NA	TRUE	TRUE	y	y	y	3	y	n	n	n	y	y	NA	1	TRUE	TRUE	10	n	1938	TRUE	9
C	Hubei	2001	2001110	n	0	0	1940	none	illit	none	NA	FALSE	FALSE	n	NA	y	3	n	n	n	n	n	n	NA	NA	FALSE	FALSE	NA	n	1961	NA	NA
C	Hubei	2001	2001111	y	1	NA	1931	none	illit	none	some	TRUE	TRUE	y	y	y	4	y	n	y	y	y	n	NA	0.41	TRUE	TRUE	10.5	y	1952	TRUE	10.5
C	Hubei	2001	2001112	y	1	1	1936	none	illit	none	none	TRUE	TRUE	y	y	n	2	y	n	y	y	y	n	NA	0.19	TRUE	TRUE	14.5	y	1960	TRUE	9.5
C	Hubei	2001	2001113	y	1	NA	1937	none	illit	none	none	FALSE	FALSE	y	y	n	4	n	n	n	n	n	n	NA	NA	FALSE	FALSE	30	y	1956	NA	-11
C	Hubei	2001	2001114	y	1	1	1930	none	illit	none	none	TRUE	TRUE	n	y	n	1	y	n	y	y	y	n	NA	0.13	TRUE	TRUE	7.5	y	1951	TRUE	13.5
C	Hubei	2001	2001115	n	0	0	1938	none	illit	none	none	TRUE	NA	y	y	y	4	n	n	n	n	y	NA	NA	NA	FALSE	TRUE	NA	y	1958	NA	NA
C	Hubei	2001	2001117	NA	NA	NA	1931	none	illit	none	NA	NA	NA	y	NA	NA	4	y	n	y	y	NA	NA	NA	0.19	TRUE	TRUE	NA	y	1955	NA	NA
C	Hubei	2001	2001118	y	1	1	1932	none	illit	none	some	TRUE	TRUE	n	y	y	4	y	n	y	y	y	n	NA	0.41	TRUE	TRUE	9.5	y	1956	TRUE	14.5
C	Hubei	2002	2002001	n	0	0	1935	none	illit	none	none	TRUE	FALSE	y	y	n	0	n	n	n	n	y	n	n	NA	FALSE	TRUE	NA	n	1955	NA	NA
C	Hubei	2002	2002002	n	0	0	1929	none	illit	none	none	TRUE	FALSE	y	y	y	3	n	n	n	n	y	n	n	NA	FALSE	TRUE	NA	n	1944	NA	NA
C	Hubei	2002	2002003	y	1	NA	1928	none	illit	none	none	FALSE	FALSE	y	y	y	3	n	n	n	n	n	n	n	NA	FALSE	FALSE	NA	n	1951	TRUE	NA
C	Hubei	2002	2002004	NA	NA	NA	1934	none	illit	none	none	TRUE	FALSE	y	y	NA	3	n	n	n	n	y	n	n	NA	FALSE	TRUE	NA	n	1954	NA	NA
C	Hubei	2002	2002005	y	1	1	1928	none	illit	none	none	TRUE	FALSE	y	n	y	0	n	n	n	n	y	n	n	NA	FALSE	TRUE	NA	n	1951	TRUE	NA
C	Hubei	2002	2002006	y	1	NA	1921	none	illit	none	none	TRUE	FALSE	NA	y	y	3	n	n	n	n	y	n	n	NA	FALSE	TRUE	NA	n	1937	TRUE	NA
C	Hubei	2002	2002007	y	1	1	1933	none	illit	none	some	TRUE	FALSE	y	y	n	4	n	n	n	n	y	n	n	NA	FALSE	TRUE	NA	n	1950	TRUE	NA
C	Hubei	2002	2002008	n	0	0	1939	some	illit	none	some	TRUE	FALSE	y	y	NA	4	n	n	n	n	y	n	n	NA	FALSE	TRUE	NA	n	1956	NA	NA
C	Hubei	2002	2002009	n	0	0	1937	none	illit	none	none	FALSE	FALSE	n	n	y	1	n	n	n	n	n	n	n	NA	FALSE	FALSE	NA	n	1957	NA	NA
C	Hubei	2002	2002010	y	1	NA	1942	some	lit	none	none	FALSE	FALSE	y	y	y	4	n	n	n	n	n	n	n	NA	FALSE	FALSE	NA	n	1958	TRUE	NA
C	Hubei	2002	2002011	n	0	0	1932	some	half	none	none	TRUE	FALSE	NA	y	n	1	n	n	n	n	y	n	n	NA	FALSE	TRUE	NA	n	1945	NA	NA
C	Hubei	2002	2002012	y	1	NA	1924	none	illit	none	some	TRUE	FALSE	y	y	y	4	n	n	n	n	y	n	n	NA	FALSE	TRUE	NA	n	1941	NA	NA
C	Hubei	2002	2002013	n	0	0	1932	none	illit	none	none	TRUE	FALSE	n	y	n	4	n	n	n	n	y	n	n	NA	FALSE	TRUE	NA	n	1948	NA	NA
C	Hubei	2002	2002014	y	1	1	1929	none	illit	none	some	TRUE	FALSE	NA	y	y	4	n	n	n	n	y	n	n	NA	FALSE	TRUE	NA	n	1948	TRUE	NA
C	Hubei	2002	2002015	y	1	1	1930	none	half	none	none	TRUE	FALSE	y	y	y	2	n	n	n	n	y	n	n	NA	FALSE	TRUE	NA	n	1951	TRUE	NA
C	Hubei	2002	2002016	n	0	0	1932	none	illit	none	none	FALSE	FALSE	y	y	y	4	n	n	n	n	n	n	n	NA	FALSE	FALSE	NA	n	1949	NA	NA
C	Hubei	2002	2002017	y	1	NA	1932	none	illit	none	some	FALSE	FALSE	y	y	y	3	n	n	n	n	n	n	n	NA	FALSE	FALSE	NA	n	1947	TRUE	NA
C	Hubei	2002	2002018	y	1	1	1926	none	illit	none	none	FALSE	FALSE	n	y	n	1	n	n	n	n	n	n	n	NA	FALSE	FALSE	NA	n	1942	TRUE	NA
C	Hubei	2002	2002019	n	0	0	1938	some	lit	none	none	TRUE	FALSE	y	y	y	1	n	n	n	n	y	n	n	NA	FALSE	TRUE	NA	n	1962	NA	NA
C	Hubei	2002	2002020	y	1	NA	1935	none	illit	none	none	TRUE	FALSE	y	y	y	4	n	n	n	n	y	n	n	NA	FALSE	TRUE	NA	n	1953	TRUE	NA
C	Hubei	2002	2002021	n	0	0	1929	none	illit	NA	NA	FALSE	FALSE	n	y	n	4	n	n	n	n	n	n	n	NA	FALSE	FALSE	NA	n	1941	NA	NA
C	Hubei	2002	2002022	n	0	0	1931	some	lit	none	some	TRUE	FALSE	y	y	y	2	n	n	n	n	y	n	n	NA	FALSE	TRUE	NA	n	1950	NA	NA
C	Hubei	2002	2002023	n	0	0	1935	some	lit	none	none	TRUE	FALSE	NA	y	y	0	n	n	n	n	y	n	n	NA	FALSE	TRUE	NA	n	1955	NA	NA
C	Hubei	2002	2002024	n	0	0	1930	none	illit	none	some	TRUE	FALSE	y	y	n	3	n	n	n	n	y	n	n	NA	FALSE	TRUE	NA	n	1944	NA	NA
C	Hubei	2002	2002025	y	1	NA	1934	none	illit	none	none	TRUE	TRUE	y	y	y	0	n	y	n	n	y	y	y	0.25	TRUE	TRUE	NA	n	1953	TRUE	NA
C	Hubei	2002	2002026	n	0	0	1937	none	half	none	none	TRUE	FALSE	y	y	y	1	n	n	n	n	y	n	n	NA	FALSE	TRUE	NA	n	1957	NA	NA
C	Hubei	2002	2002027	y	1	1	1935	none	illit	none	none	TRUE	FALSE	y	y	y	3	n	n	n	n	y	n	n	NA	FALSE	TRUE	NA	n	1950	TRUE	NA
C	Hubei	2002	2002028	y	1	1	1936	none	illit	none	none	FALSE	FALSE	y	NA	y	4	n	n	n	n	n	n	n	NA	FALSE	FALSE	NA	n	1956	TRUE	NA
C	Hubei	2002	2002029	n	0	0	1936	none	illit	none	none	FALSE	FALSE	y	n	y	3	n	n	n	n	n	n	n	NA	FALSE	FALSE	NA	n	1955	NA	NA
C	Hubei	2002	2002030	y	1	1	1928	none	illit	none	some	TRUE	TRUE	y	y	y	2	n	n	n	n	y	y	n	NA	TRUE	TRUE	NA	n	1936	TRUE	NA
C	Hubei	2002	2002031	n	0	0	1939	none	illit	none	none	TRUE	FALSE	NA	y	y	NA	n	n	n	n	y	n	n	NA	FALSE	TRUE	NA	n	1960	NA	NA
C	Hubei	2002	2002032	n	0	0	1934	none	illit	none	none	TRUE	FALSE	y	y	y	4	n	n	n	n	y	n	n	NA	FALSE	TRUE	NA	y	1952	NA	NA
C	Hubei	2002	2002033	n	0	0	1929	none	illit	none	none	TRUE	FALSE	y	y	y	2	n	n	n	n	y	n	n	NA	FALSE	TRUE	NA	n	1952	NA	NA
C	Hubei	2002	2002034	y	1	1	1931	none	illit	none	none	TRUE	FALSE	NA	y	y	3	n	n	n	n	y	n	n	NA	FALSE	TRUE	NA	n	1946	TRUE	NA
C	Hubei	2002	2002035	y	1	1	1929	none	illit	none	none	TRUE	FALSE	y	y	y	NA	n	n	n	n	y	n	n	NA	FALSE	TRUE	NA	n	1954	TRUE	NA
C	Hubei	2002	2002036	n	0	0	1929	none	illit	none	none	FALSE	FALSE	y	y	n	NA	n	n	n	n	n	n	n	NA	FALSE	FALSE	NA	n	1948	NA	NA
C	Hubei	2002	2002037	y	1	1	1931	none	illit	none	none	TRUE	FALSE	y	y	y	NA	n	n	n	n	y	n	n	NA	FALSE	TRUE	NA	n	1948	TRUE	NA
C	Hubei	2002	2002038	n	0	0	1939	none	illit	none	none	TRUE	FALSE	NA	y	n	3	n	n	n	n	y	n	n	NA	FALSE	TRUE	NA	n	1957	NA	NA
C	Hubei	2002	2002039	y	1	1	1931	none	illit	none	none	FALSE	FALSE	NA	y	y	NA	n	n	n	n	n	n	n	NA	FALSE	FALSE	NA	n	1947	TRUE	NA
C	Hubei	2002	2002040	y	1	1	1933	none	illit	none	none	FALSE	FALSE	NA	y	y	4	n	n	n	n	n	n	n	NA	FALSE	FALSE	NA	n	1948	TRUE	NA
C	Hubei	2002	2002041	n	0	0	1930	some	half	none	none	TRUE	FALSE	y	y	n	NA	n	n	n	n	y	n	n	NA	FALSE	TRUE	NA	n	1950	NA	NA
C	Hubei	2002	2002042	y	1	1	1933	some	lit	none	some	TRUE	FALSE	y	y	y	4	n	n	n	n	y	n	n	NA	FALSE	TRUE	NA	n	1951	TRUE	NA
C	Hubei	2002	2002043	y	1	1	1932	some	lit	none	some	TRUE	TRUE	y	y	y	4	n	n	n	n	y	y	n	NA	TRUE	TRUE	NA	n	1952	TRUE	NA
C	Hubei	2002	2002044	y	1	NA	1937	none	illit	none	some	FALSE	FALSE	NA	y	y	4	n	n	n	n	n	n	n	NA	FALSE	FALSE	NA	n	1953	TRUE	NA
C	Hubei	2002	2002045	y	1	NA	1940	some	illit	none	none	TRUE	FALSE	y	y	y	4	n	n	n	n	y	n	n	NA	FALSE	TRUE	NA	n	1957	TRUE	NA
C	Hubei	2002	2002046	n	0	0	1933	none	illit	none	none	TRUE	FALSE	y	y	n	4	n	n	n	n	y	n	n	NA	FALSE	TRUE	NA	n	1954	NA	NA
C	Hubei	2002	2002047	y	1	NA	1936	some	half	none	some	TRUE	FALSE	y	y	y	4	n	n	n	n	y	n	n	NA	FALSE	TRUE	NA	n	1954	NA	NA
C	Hubei	2002	2002048	y	1	NA	1927	none	illit	none	none	FALSE	FALSE	y	y	y	0	n	n	n	n	n	n	n	NA	FALSE	FALSE	NA	n	1943	NA	NA
C	Hubei	2002	2002049	y	1	1	1927	none	illit	none	none	TRUE	FALSE	y	y	n	4	n	n	n	n	y	n	n	NA	FALSE	TRUE	NA	n	1945	TRUE	NA
C	Hubei	2002	2002050	n	0	0	1935	none	illit	none	none	FALSE	FALSE	y	y	y	1	n	n	n	n	n	n	n	NA	FALSE	FALSE	NA	n	1951	NA	NA
C	Hubei	2002	2002051	y	1	NA	1940	some	lit	none	none	FALSE	FALSE	NA	y	y	1	n	n	n	n	n	n	n	NA	FALSE	FALSE	NA	n	1956	NA	NA
C	Hubei	2002	2002052	y	1	1	1925	none	illit	none	none	FALSE	FALSE	y	y	y	2	n	n	n	n	n	n	n	NA	FALSE	FALSE	NA	n	1943	TRUE	NA
C	Hubei	2002	2002053	n	0	0	1931	none	illit	none	some	TRUE	FALSE	y	y	y	2	n	n	n	n	y	n	n	NA	FALSE	TRUE	NA	n	1948	NA	NA
C	Hubei	2002	2002054	n	0	0	1935	some	illit	none	none	TRUE	FALSE	y	y	y	3	n	n	n	n	y	n	n	NA	FALSE	TRUE	NA	n	1954	NA	NA
C	Hubei	2002	2002055	y	1	1	1926	none	illit	none	some	TRUE	FALSE	y	y	y	4	n	n	n	n	y	n	NA	NA	FALSE	TRUE	17	n	1943	TRUE	0
C	Hubei	2002	2002056	n	0	0	1931	none	illit	none	some	TRUE	TRUE	n	NA	n	2	y	y	n	n	n	n	NA	NA	FALSE	FALSE	22	n	1945	NA	-8
C	Hubei	2002	2002057	n	0	0	1937	some	half	none	none	TRUE	TRUE	y	y	y	4	y	y	y	y	y	n	y	0.25	TRUE	TRUE	7	y	1957	NA	13
C	Hubei	2002	2002058	n	0	0	1923	NA	half	some	some	NA	NA	n	y	n	NA	NA	NA	n	n	y	n	y	NA	FALSE	TRUE	13	n	1941	NA	5
C	Hubei	2002	2002059	n	0	0	1928	none	illit	none	none	TRUE	TRUE	y	y	n	2	y	y	n	n	y	n	y	0.25	FALSE	TRUE	12.5	NA	1945	NA	4.5
C	Hubei	2002	2002060	y	1	1	1937	some	half	none	none	TRUE	FALSE	y	y	y	4	n	n	n	n	y	n	n	NA	FALSE	TRUE	30	n	1958	TRUE	-9
C	Hubei	2002	2002061	n	0	0	1932	none	illit	some	some	FALSE	FALSE	y	y	y	4	n	n	n	n	n	n	n	NA	FALSE	FALSE	NA	n	1952	NA	NA
C	Hubei	2002	2002062	n	0	0	1935	some	lit	some	some	TRUE	FALSE	NA	y	y	3	n	n	n	n	y	n	n	NA	FALSE	TRUE	NA	n	1953	NA	NA
C	Hubei	2002	2002063	n	0	0	1939	none	illit	none	none	TRUE	FALSE	y	NA	y	4	n	n	n	n	y	n	n	NA	FALSE	TRUE	NA	n	1959	NA	NA
C	Hubei	2002	2002064	n	0	0	1935	none	illit	none	none	NA	NA	y	y	NA	4	y	n	NA	NA	y	NA	NA	NA	FALSE	TRUE	NA	n	1954	NA	NA
C	Hubei	2002	2002065	y	1	NA	1923	none	illit	none	none	TRUE	TRUE	y	y	y	4	y	n	y	n	y	y	NA	NA	TRUE	TRUE	NA	n	1940	TRUE	NA
C	Hubei	2002	2002066	y	1	NA	1934	none	illit	none	none	FALSE	FALSE	y	y	y	4	n	n	n	n	n	n	n	NA	FALSE	FALSE	NA	n	1951	NA	NA
C	Hubei	2002	2002067	y	1	1	1931	some	half	none	some	TRUE	FALSE	y	y	y	4	n	n	n	n	y	n	n	NA	FALSE	TRUE	NA	n	1949	TRUE	NA
C	Hubei	2002	2002068	n	0	0	1939	none	illit	none	none	FALSE	FALSE	y	NA	y	3	n	n	n	n	n	n	NA	NA	FALSE	FALSE	NA	NA	1955	NA	NA
C	Hubei	2002	2002069	y	1	1	1932	none	illit	none	some	TRUE	FALSE	y	y	y	NA	n	n	n	n	y	n	n	NA	FALSE	TRUE	NA	n	1950	TRUE	NA
C	Hubei	2002	2002070	NA	NA	NA	1925	some	half	none	none	TRUE	FALSE	y	y	y	2	n	n	n	n	y	n	n	NA	FALSE	TRUE	NA	n	1950	NA	NA
C	Hubei	2002	2002071	n	0	0	1935	some	lit	none	none	FALSE	TRUE	y	y	y	3	n	y	n	n	n	n	n	0.25	FALSE	FALSE	11	y	1953	NA	7
C	Hubei	2002	2002072	n	0	0	1928	none	illit	none	none	FALSE	TRUE	y	y	NA	3	n	y	n	n	n	n	y	0.06	FALSE	FALSE	20	NA	1952	NA	4
C	Hubei	2002	2002073	y	1	1	1935	none	illit	none	some	TRUE	FALSE	y	y	n	4	n	n	n	n	y	n	n	NA	FALSE	TRUE	NA	n	1953	TRUE	NA
C	Hubei	2002	2002074	n	0	0	1930	none	half	none	none	TRUE	FALSE	y	NA	y	1	n	n	n	n	y	n	n	NA	FALSE	TRUE	NA	n	1950	NA	NA
C	Hubei	2002	2002076	n	0	0	1928	none	illit	none	none	FALSE	FALSE	y	y	n	1	n	n	n	n	n	n	n	NA	FALSE	FALSE	NA	n	1948	NA	NA
C	Hubei	2002	2002077	n	0	0	1938	none	illit	none	NA	TRUE	FALSE	y	y	n	4	n	n	n	n	y	n	n	NA	FALSE	TRUE	NA	n	1956	NA	NA
C	Hubei	2002	2002078	n	0	0	1929	none	illit	none	none	FALSE	FALSE	y	n	NA	1	n	n	n	n	n	n	n	NA	FALSE	FALSE	NA	n	1949	NA	NA
C	Hubei	2002	2002079	y	1	1	1923	none	illit	none	none	TRUE	FALSE	y	y	y	4	n	n	n	n	y	n	n	NA	FALSE	TRUE	NA	n	1938	TRUE	NA
C	Hubei	2002	2002080	n	0	0	1935	some	lit	none	none	TRUE	FALSE	n	n	y	NA	n	n	n	n	y	n	n	NA	FALSE	TRUE	NA	n	1954	NA	NA
C	Hubei	2002	2002081	y	1	1	1934	none	half	none	none	TRUE	FALSE	y	y	y	4	n	n	n	n	y	n	n	NA	FALSE	TRUE	NA	n	1950	TRUE	NA
C	Hubei	2002	2002082	y	1	1	1938	some	illit	none	some	TRUE	FALSE	n	y	y	4	n	n	n	n	y	n	n	NA	FALSE	TRUE	NA	n	1961	TRUE	NA
C	Hubei	2002	2002083	y	1	NA	1929	some	lit	none	NA	TRUE	FALSE	y	y	y	3	n	n	n	n	y	n	n	NA	FALSE	TRUE	NA	n	1949	TRUE	NA
C	Hubei	2002	2002084	y	1	NA	1937	none	illit	none	some	TRUE	FALSE	y	y	y	4	n	n	n	n	y	n	n	NA	FALSE	TRUE	NA	n	1954	TRUE	NA
C	Hubei	2002	2002085	y	1	1	1930	none	illit	none	some	FALSE	FALSE	y	y	y	3	n	n	n	n	n	n	n	NA	FALSE	FALSE	NA	n	1947	TRUE	NA
C	Hubei	2002	2002086	y	1	1	1929	none	illit	none	none	TRUE	FALSE	y	y	n	3	n	n	n	n	y	n	n	NA	FALSE	TRUE	NA	n	1948	TRUE	NA
C	Hubei	2002	2002087	y	1	NA	1939	some	illit	none	some	TRUE	FALSE	y	y	y	4	n	n	n	n	y	n	n	NA	FALSE	TRUE	NA	n	1957	TRUE	NA
C	Hubei	2002	2002088	n	0	0	1935	none	illit	none	none	TRUE	FALSE	y	y	y	3	n	n	n	n	y	n	n	NA	FALSE	TRUE	NA	n	1954	NA	NA
C	Hubei	2002	2002089	n	0	0	1935	some	half	none	none	TRUE	FALSE	n	y	n	4	n	n	n	n	y	n	n	NA	FALSE	TRUE	NA	n	1953	NA	NA
C	Hubei	2002	2002090	y	1	1	1934	none	illit	none	none	NA	NA	y	y	NA	4	n	n	n	n	NA	NA	n	NA	FALSE	FALSE	NA	n	1950	TRUE	NA
C	Hubei	2002	2002091	n	0	0	1930	none	illit	none	some	TRUE	FALSE	y	y	n	4	y	n	n	n	y	n	n	NA	FALSE	TRUE	NA	n	1949	NA	NA
C	Hubei	2002	2002092	y	1	1	1928	none	illit	none	none	TRUE	FALSE	y	y	y	4	y	n	n	n	y	n	n	NA	FALSE	TRUE	NA	n	1944	TRUE	NA
C	Hubei	2002	2002093	y	1	1	1925	some	illit	none	some	TRUE	FALSE	y	y	n	3	n	n	n	n	y	n	n	NA	FALSE	TRUE	NA	n	1939	TRUE	NA
C	Hubei	2002	2002094	y	1	NA	1923	none	lit	none	none	TRUE	FALSE	n	y	n	4	n	n	n	n	y	n	n	NA	FALSE	TRUE	NA	n	1941	TRUE	NA
C	Hubei	2002	2002095	n	0	0	1940	some	half	some	some	TRUE	FALSE	NA	n	y	4	n	n	n	n	y	n	y	NA	FALSE	TRUE	NA	y	1957.5	NA	NA
C	Hubei	2002	2002096	y	1	NA	1933	some	lit	none	some	TRUE	FALSE	y	y	y	4	n	n	n	n	y	n	n	NA	FALSE	TRUE	NA	n	1948	TRUE	NA
C	Hubei	2002	2002097	n	0	0	1940	some	illit	none	none	TRUE	FALSE	y	y	y	NA	n	n	n	n	y	n	n	NA	FALSE	TRUE	NA	n	1956	NA	NA
C	Hubei	2002	2002098	n	0	0	1936	none	illit	none	none	TRUE	FALSE	y	y	y	4	n	n	n	n	y	n	n	NA	FALSE	TRUE	20	n	1954	NA	-2
C	Hubei	2002	2002099	y	1	1	1927	none	illit	none	none	TRUE	FALSE	y	y	y	4	n	n	n	n	y	n	n	NA	FALSE	TRUE	NA	y	1946	TRUE	NA
C	Hubei	2002	2002100	y	1	1	1930	none	illit	none	none	TRUE	TRUE	y	y	y	3	y	y	y	y	y	n	y	0.19	TRUE	TRUE	NA	y	1948	TRUE	NA
C	Hubei	2002	2002101	n	0	0	1932	NA	half	none	some	NA	NA	y	y	y	4	NA	NA	NA	NA	y	n	y	NA	FALSE	TRUE	NA	n	1949	NA	NA
C	Hubei	2002	2002102	n	0	0	1940	none	illit	none	none	TRUE	FALSE	y	y	y	4	n	n	n	n	y	n	n	NA	FALSE	TRUE	NA	n	1956	NA	NA
C	Hubei	2002	2002103	n	0	0	1931	some	lit	some	some	TRUE	FALSE	y	n	y	3	y	n	n	n	y	n	y	0.19	FALSE	TRUE	13	n	1954	NA	10
C	Hubei	2002	2002104	n	0	0	1934	none	illit	none	none	TRUE	TRUE	y	n	n	4	y	y	y	y	y	n	y	0.22	TRUE	TRUE	NA	n	1954	NA	NA
C	Hubei	2002	2002105	y	1	1	1934	some	half	none	none	TRUE	FALSE	y	y	y	2	n	n	n	n	y	n	n	NA	FALSE	TRUE	NA	n	1950	TRUE	NA
C	Hubei	2002	2002106	y	1	1	1930	some	lit	none	none	TRUE	FALSE	y	y	y	4	n	n	n	n	y	n	n	NA	FALSE	TRUE	NA	n	1950	TRUE	NA
C	Hubei	2002	2002107	n	0	0	1926	none	illit	none	some	TRUE	FALSE	y	y	y	NA	n	n	n	n	y	n	n	NA	FALSE	TRUE	NA	n	1939	NA	NA
C	Hubei	2002	2002108	y	1	1	1933	none	illit	none	none	TRUE	FALSE	y	y	y	NA	n	n	n	n	y	n	n	NA	FALSE	TRUE	NA	n	1948	TRUE	NA
C	Hubei	2002	2002109	y	1	1	1928	none	half	none	none	TRUE	FALSE	y	y	y	4	n	n	n	n	y	n	n	NA	FALSE	TRUE	NA	n	1943	TRUE	NA
C	Hubei	2002	2002110	y	1	NA	1930	some	lit	none	none	TRUE	FALSE	y	y	y	4	n	n	n	n	y	n	n	NA	FALSE	TRUE	NA	n	1947	TRUE	NA
C	Hubei	2002	2002111	y	1	1	1924	none	illit	none	some	TRUE	FALSE	y	y	y	NA	n	n	n	n	y	n	n	NA	FALSE	TRUE	NA	n	1946	TRUE	NA
C	Hubei	2002	2002112	NA	NA	NA	1937	none	half	none	none	TRUE	FALSE	y	y	y	NA	n	n	n	n	y	n	n	NA	FALSE	TRUE	NA	n	1955	NA	NA
C	Hubei	2002	2002113	y	1	1	1940	some	lit	none	none	TRUE	FALSE	y	y	y	NA	n	n	n	n	y	n	n	NA	FALSE	TRUE	NA	n	1963	TRUE	NA
C	Hubei	2002	2002114	n	0	0	1939	some	half	none	some	TRUE	FALSE	y	n	y	NA	n	n	n	n	y	n	n	NA	FALSE	TRUE	NA	n	1959	NA	NA
C	Hubei	2002	2002115	n	0	0	1937	none	illit	none	some	TRUE	FALSE	y	y	y	4	n	n	n	n	y	n	n	NA	FALSE	TRUE	NA	n	1953	NA	NA
C	Hubei	2002	2002116	n	0	0	1939	some	lit	none	none	TRUE	FALSE	y	y	y	NA	n	n	n	n	y	n	n	NA	FALSE	TRUE	NA	n	1962	NA	NA
C	Hubei	2002	2002117	y	1	1	1934	none	illit	none	none	FALSE	FALSE	y	y	y	NA	n	n	n	n	n	n	n	NA	FALSE	FALSE	NA	n	1957	TRUE	NA
C	Hubei	2002	2002118	n	0	0	1938	none	illit	none	none	TRUE	FALSE	y	y	y	4	n	n	n	n	y	n	n	NA	FALSE	TRUE	NA	n	1956	NA	NA
C	Hubei	2002	2002119	n	0	0	1935	none	illit	none	some	TRUE	FALSE	y	y	y	4	n	n	n	n	y	n	n	NA	FALSE	TRUE	NA	n	1957	NA	NA
C	Hubei	2002	2002120	n	0	0	1936	none	illit	none	none	TRUE	FALSE	y	y	y	NA	n	n	n	n	y	n	n	NA	FALSE	TRUE	NA	n	1954	NA	NA
C	Hubei	2002	2002121	n	0	0	1935	none	illit	none	none	TRUE	FALSE	y	n	y	NA	n	n	n	n	y	n	n	NA	FALSE	TRUE	NA	n	1953	NA	NA
C	Hubei	2002	2002122	n	0	0	1934	none	illit	none	none	FALSE	FALSE	y	n	y	3	n	n	n	n	n	n	n	NA	FALSE	FALSE	NA	n	1952	NA	NA
C	Hubei	2002	2002123	n	0	0	1940	none	illit	NA	NA	TRUE	FALSE	y	y	y	NA	n	n	n	n	y	n	n	NA	FALSE	TRUE	NA	n	1960	NA	NA
C	Hubei	2002	2002124	n	0	0	1940	some	lit	none	none	TRUE	FALSE	y	y	y	4	n	n	n	n	y	n	n	NA	FALSE	TRUE	NA	n	1962	NA	NA
C	Hubei	2002	2002125	n	0	0	1933	some	lit	none	some	TRUE	FALSE	y	y	y	4	n	n	n	n	y	n	n	NA	FALSE	TRUE	NA	n	1949	NA	NA
C	Hubei	2002	2002126	y	1	1	1923	none	illit	none	none	TRUE	FALSE	y	y	y	4	n	n	n	n	y	n	n	NA	FALSE	TRUE	NA	n	1940	TRUE	NA
C	Hubei	2002	2002127	y	1	NA	1919	none	illit	none	none	TRUE	FALSE	y	y	y	NA	n	n	n	n	y	n	n	NA	FALSE	TRUE	NA	n	1934	TRUE	NA
C	Hubei	2002	2002128	y	1	1	1929	none	illit	none	none	TRUE	FALSE	y	y	y	4	n	n	n	n	y	n	n	NA	FALSE	TRUE	NA	n	1943	TRUE	NA
C	Hubei	2002	2002129	n	0	0	1930	none	illit	none	none	TRUE	FALSE	y	y	y	NA	n	n	n	n	y	n	n	NA	FALSE	TRUE	NA	n	1945	NA	NA
C	Hubei	2002	2002130	n	0	0	1935	some	half	none	none	TRUE	FALSE	y	y	y	4	n	n	n	n	y	n	n	NA	FALSE	TRUE	NA	n	1952	NA	NA
C	Hubei	2002	2002131	n	0	0	1940	none	illit	none	none	TRUE	FALSE	y	y	y	2	n	n	n	n	y	n	n	NA	FALSE	TRUE	NA	n	1962	NA	NA
C	Hubei	2002	2002132	y	1	NA	1940	none	illit	none	none	TRUE	FALSE	y	y	y	2	n	n	n	n	y	n	n	NA	FALSE	TRUE	NA	n	1962	TRUE	NA
C	Hubei	2002	2002133	n	0	0	1937	none	illit	none	none	TRUE	FALSE	y	y	y	4	n	n	n	n	y	n	n	NA	FALSE	TRUE	NA	n	1955	NA	NA
C	Hubei	2002	2002134	n	0	0	1935	none	illit	none	none	TRUE	FALSE	y	y	y	NA	n	n	n	n	y	n	n	NA	FALSE	TRUE	NA	n	1954	NA	NA
C	Hubei	2002	2002135	n	0	0	1936	none	half	none	none	TRUE	FALSE	y	y	y	4	n	n	n	n	y	n	n	NA	FALSE	TRUE	NA	n	1959	NA	NA
C	Hubei	2002	2002136	n	0	0	1936	none	half	none	none	TRUE	FALSE	y	y	y	3	n	n	n	n	y	n	n	NA	FALSE	TRUE	NA	n	1956	NA	NA
C	Hubei	2002	2002137	n	0	0	1942	none	illit	none	some	TRUE	TRUE	y	y	y	NA	y	n	y	y	y	n	y	1	TRUE	TRUE	NA	y	1958	NA	NA
C	Hubei	2002	2002138	y	1	1	1923	none	illit	none	none	TRUE	FALSE	y	n	y	4	n	n	n	n	y	n	n	NA	FALSE	TRUE	NA	n	1939	TRUE	NA
C	Hubei	2002	2002139	y	1	1	1929	none	illit	none	none	FALSE	FALSE	y	y	y	NA	n	n	n	n	n	n	n	NA	FALSE	FALSE	NA	n	1947	TRUE	NA
C	Hubei	2002	2002140	n	0	0	1937	none	illit	none	none	TRUE	FALSE	y	y	y	NA	n	n	n	n	y	n	n	NA	FALSE	TRUE	NA	n	1961	NA	NA
C	Hubei	2002	2002141	y	1	1	1929	some	illit	none	none	TRUE	FALSE	y	y	y	4	n	n	n	n	y	n	n	NA	FALSE	TRUE	NA	n	1949	TRUE	NA
C	Hubei	2002	2002142	n	0	0	1940	some	lit	none	none	TRUE	FALSE	y	y	n	NA	n	n	n	n	y	n	y	NA	FALSE	TRUE	NA	y	1958	NA	NA
C	Hubei	2002	2002143	n	0	0	1935	some	lit	none	some	TRUE	FALSE	y	y	n	1	n	n	n	n	y	n	n	NA	FALSE	TRUE	NA	n	1955	NA	NA
C	Hubei	2002	2002144	n	0	0	1932	some	lit	NA	some	TRUE	FALSE	n	n	y	0	y	n	n	n	y	n	n	NA	FALSE	TRUE	NA	n	1952	NA	NA
C	Hubei	2002	2002145	n	0	0	1929	none	illit	none	some	TRUE	FALSE	y	n	y	2	y	n	n	n	y	n	n	NA	FALSE	TRUE	NA	n	1955	NA	NA
C	Hubei	2002	2002146	y	1	1	1935	none	illit	none	none	TRUE	TRUE	n	y	n	NA	n	n	n	n	y	y	n	NA	TRUE	TRUE	NA	n	1954	TRUE	NA
C	Hubei	2002	2002147	y	1	1	1935	none	illit	none	none	FALSE	FALSE	y	y	n	4	n	n	n	n	n	n	n	NA	FALSE	FALSE	NA	n	1953	TRUE	NA
C	Hubei	2002	2002148	y	1	1	1931	none	illit	none	none	FALSE	FALSE	y	y	y	4	n	n	n	n	n	n	n	NA	FALSE	FALSE	NA	n	1951	TRUE	NA
C	Hubei	2002	2002149	n	0	0	1938	some	half	none	none	FALSE	FALSE	n	y	y	1	n	n	n	n	n	n	n	NA	FALSE	FALSE	NA	n	1958	NA	NA
C	Hubei	2002	2002150	n	0	0	1934	none	illit	none	none	FALSE	FALSE	y	y	NA	3	n	n	n	n	n	n	n	NA	FALSE	FALSE	NA	n	1949	NA	NA
C	Hubei	2002	2002151	y	1	1	1931	none	illit	none	none	FALSE	FALSE	y	y	n	NA	n	n	n	n	n	n	n	NA	FALSE	FALSE	NA	n	1949	TRUE	NA
C	Hubei	2002	2002152	y	1	1	1933	none	illit	none	none	FALSE	FALSE	y	y	n	4	n	n	n	n	n	n	y	NA	FALSE	FALSE	NA	n	1949	TRUE	NA
C	Hubei	2002	2002153	n	0	0	1935	some	lit	none	none	TRUE	FALSE	y	y	y	4	n	n	n	n	y	n	n	NA	FALSE	TRUE	NA	n	1959	NA	NA
C	Hubei	2002	2002154	n	0	0	1933	some	lit	none	none	FALSE	FALSE	y	y	n	4	n	n	n	n	n	n	n	NA	FALSE	FALSE	NA	n	1951	NA	NA
C	Hubei	2002	2002155	n	0	0	1939	none	illit	none	none	TRUE	FALSE	y	y	y	4	n	n	n	n	y	n	n	NA	FALSE	TRUE	NA	n	1955	NA	NA
C	Hubei	2002	2002156	y	1	1	1938	some	half	none	none	FALSE	FALSE	y	y	n	4	n	n	n	n	n	n	n	NA	FALSE	FALSE	NA	n	1963	TRUE	NA
C	Hubei	2002	2002157	y	1	1	1928	NA	illit	none	some	NA	NA	n	y	y	4	NA	NA	NA	NA	y	NA	NA	NA	FALSE	TRUE	NA	n	1946	TRUE	NA
C	Hubei	2002	2002158	y	1	1	1931	none	illit	none	none	FALSE	FALSE	NA	y	y	NA	n	n	n	n	n	n	NA	NA	FALSE	FALSE	NA	NA	1947	TRUE	NA
C	Hubei	2002	2002159	n	0	0	1936	some	half	none	some	TRUE	FALSE	y	y	y	3	n	n	n	n	y	n	NA	NA	FALSE	TRUE	NA	NA	1955	NA	NA
C	Hubei	2002	2002160	n	0	0	1938	some	lit	none	none	TRUE	FALSE	n	y	y	4	n	n	n	n	y	n	NA	NA	FALSE	TRUE	NA	NA	1960	NA	NA
C	Hubei	2002	2002161	y	1	1	1935	NA	half	none	none	NA	NA	n	y	y	2	NA	NA	n	n	n	n	NA	NA	FALSE	FALSE	NA	NA	1949	TRUE	NA
C	Hubei	2002	2002162	n	0	0	1934	none	illit	none	none	FALSE	FALSE	y	y	y	4	n	n	n	n	n	n	n	NA	FALSE	FALSE	NA	n	1947	NA	NA
C	Hubei	2002	2002163	y	1	NA	1936	none	illit	none	none	FALSE	FALSE	y	y	n	4	n	n	n	n	n	n	n	NA	FALSE	FALSE	NA	n	1963	TRUE	NA
C	Hubei	2002	2002164	y	1	1	1933	none	illit	none	none	TRUE	FALSE	y	y	y	4	n	n	n	n	y	n	n	NA	FALSE	TRUE	NA	n	1951	TRUE	NA
C	Hubei	2002	2002165	n	0	0	1932	none	illit	none	none	FALSE	FALSE	y	y	y	4	n	n	n	n	n	n	n	NA	FALSE	FALSE	NA	n	1950	NA	NA
C	Hubei	2002	2002166	n	0	0	1936	some	half	none	none	TRUE	FALSE	y	n	NA	2	n	n	n	n	y	n	n	NA	FALSE	TRUE	NA	n	1957	NA	NA
C	Hubei	2002	2002167	n	0	0	1940	some	illit	none	NA	FALSE	FALSE	NA	y	y	3	n	n	n	n	n	n	n	NA	FALSE	FALSE	NA	n	1958	NA	NA
C	Hubei	2002	2002168	n	0	0	1938	some	illit	some	some	FALSE	FALSE	n	y	n	4	n	n	n	n	n	n	n	NA	FALSE	FALSE	NA	n	1955	NA	NA
C	Hubei	2002	2002169	n	0	0	1935	none	illit	none	none	TRUE	FALSE	n	n	y	4	y	n	n	n	y	n	n	NA	FALSE	TRUE	NA	n	1953	NA	NA
C	Hubei	2002	2002170	n	0	0	1938	some	half	none	none	TRUE	FALSE	n	y	n	4	n	n	n	n	y	n	n	NA	FALSE	TRUE	NA	n	1957	NA	NA
C	Hubei	2002	2002171	n	0	0	1938	some	illit	none	some	TRUE	TRUE	y	y	y	4	n	n	n	n	y	y	n	NA	TRUE	TRUE	NA	n	1959	NA	NA
C	Hubei	2002	2002172	y	1	1	1930	none	illit	some	some	TRUE	FALSE	y	y	n	4	n	n	n	n	y	n	n	NA	FALSE	TRUE	NA	n	1950	TRUE	NA
C	Hubei	2002	2002173	y	1	1	1930	none	illit	none	none	TRUE	FALSE	y	y	y	4	n	n	n	n	y	n	n	NA	FALSE	TRUE	NA	n	1948	TRUE	NA
C	Hubei	2002	2002174	y	1	NA	1932	none	illit	none	some	TRUE	FALSE	y	y	y	4	n	n	n	n	y	n	n	NA	FALSE	TRUE	NA	n	1951	TRUE	NA
C	Hubei	2002	2002176	y	1	NA	1934	some	half	none	some	NA	NA	NA	y	y	NA	NA	NA	NA	NA	NA	NA	NA	NA	FALSE	FALSE	NA	NA	1953	TRUE	NA
C	Hubei	2002	2002177	y	1	NA	1928	none	illit	NA	NA	NA	NA	NA	y	NA	NA	NA	NA	NA	NA	NA	NA	NA	NA	FALSE	FALSE	NA	NA	1944	NA	NA
C	Hubei	2002	2002178	y	1	1	1934	none	illit	none	none	NA	NA	n	y	n	4	n	n	n	n	NA	NA	n	NA	FALSE	FALSE	NA	n	1952	TRUE	NA
C	Hubei	2002	2002179	y	1	NA	1932	some	half	none	none	NA	NA	NA	y	y	4	n	n	n	n	NA	NA	n	NA	FALSE	FALSE	NA	n	1952	TRUE	NA
C	Hubei	2002	2002180	y	1	1	1929	none	illit	none	none	TRUE	TRUE	y	y	y	3	n	n	n	n	y	y	n	NA	TRUE	TRUE	NA	n	1946	TRUE	NA
C	Hubei	2002	2002181	n	0	0	1940	none	illit	none	none	TRUE	FALSE	y	y	y	4	n	n	n	n	y	n	n	NA	FALSE	TRUE	NA	n	1957	NA	NA
C	Hubei	2002	2002182	n	0	0	1939	some	lit	none	none	TRUE	FALSE	y	n	y	4	y	n	n	n	y	n	n	NA	FALSE	TRUE	NA	n	1957	NA	NA
C	Hubei	2002	2002183	n	0	0	1939	some	lit	none	none	TRUE	FALSE	y	y	y	NA	y	n	n	n	y	n	n	NA	FALSE	TRUE	NA	n	1957	NA	NA
C	Hubei	2002	2002184	n	0	0	1940	some	half	none	none	FALSE	FALSE	y	y	n	2	n	n	n	n	n	n	n	NA	FALSE	FALSE	NA	n	1960	NA	NA
C	Hubei	2002	2002185	n	0	0	1937	none	illit	none	NA	TRUE	FALSE	y	y	y	4	y	n	n	n	n	n	n	NA	FALSE	FALSE	NA	n	1954	NA	NA
C	Hubei	2002	2002186	n	0	0	1929	none	illit	none	none	TRUE	FALSE	y	y	n	4	n	n	n	n	y	n	n	NA	FALSE	TRUE	NA	n	1948	NA	NA
C	Hubei	2002	2002187	n	0	0	1935	none	illit	none	none	FALSE	FALSE	y	y	n	NA	n	n	n	n	n	n	n	NA	FALSE	FALSE	NA	n	1957	NA	NA
C	Hubei	2002	2002188	y	1	NA	1930	none	illit	none	none	FALSE	FALSE	y	y	y	4	n	n	n	n	n	n	n	NA	FALSE	FALSE	NA	n	1944	TRUE	NA
C	Hubei	2002	2002189	y	1	1	1922	none	illit	none	none	NA	NA	NA	y	y	2	n	n	n	n	NA	NA	n	NA	FALSE	FALSE	NA	y	1944	TRUE	NA
C	Hubei	2002	2002190	y	1	NA	1931	none	illit	none	none	NA	NA	NA	y	NA	NA	NA	NA	NA	NA	NA	NA	NA	NA	FALSE	FALSE	NA	NA	NA	NA	NA
C	Hubei	2002	2002191	n	0	0	1930	none	illit	some	some	NA	NA	y	y	NA	4	NA	NA	NA	NA	NA	NA	y	NA	FALSE	FALSE	NA	NA	1948	NA	NA
C	Hubei	2002	2002192	n	0	0	1936	some	lit	none	none	NA	NA	y	y	NA	NA	NA	NA	NA	NA	y	n	NA	NA	FALSE	TRUE	NA	NA	1954	NA	NA
C	Hubei	2002	2002193	y	1	NA	1933	none	illit	none	some	TRUE	FALSE	y	y	y	4	n	n	n	n	y	n	n	NA	FALSE	TRUE	12	n	1951	TRUE	6
C	Hubei	2002	2002194	n	0	0	1933	some	lit	none	some	TRUE	FALSE	n	n	NA	0	n	n	n	n	y	n	n	NA	FALSE	TRUE	NA	n	1951	NA	NA
C	Hubei	2002	2002195	n	0	0	1926	none	illit	none	none	TRUE	TRUE	n	y	y	4	y	y	n	n	y	n	y	0.25	FALSE	TRUE	10	y	1944	NA	8
C	Hubei	2002	2002196	n	0	0	1933	none	illit	NA	NA	TRUE	TRUE	y	n	y	4	y	y	n	n	y	n	NA	0.25	FALSE	TRUE	10	n	1957	NA	14
C	Hubei	2002	2002197	n	0	0	1939	none	illit	none	none	TRUE	NA	y	n	n	4	n	n	n	n	y	NA	n	NA	FALSE	TRUE	NA	n	1955	NA	NA
C	Hubei	2002	2002198	y	1	1	1926	none	illit	none	NA	TRUE	NA	y	y	y	NA	n	n	n	n	y	NA	n	NA	FALSE	TRUE	NA	n	1947	TRUE	NA
C	Hubei	2002	2002199	y	1	NA	1926	none	illit	none	none	TRUE	TRUE	y	y	y	4	n	n	n	n	y	y	n	NA	TRUE	TRUE	NA	n	1941	TRUE	NA
C	Hubei	2002	2002200	n	0	0	1933	none	illit	none	some	TRUE	FALSE	y	y	n	3	y	n	n	n	n	n	y	NA	FALSE	FALSE	NA	y	1949	NA	NA
C	Hubei	2002	2002201	y	1	1	1924	none	half	none	some	FALSE	FALSE	n	y	y	NA	n	n	n	n	n	n	n	NA	FALSE	FALSE	NA	n	1944	TRUE	NA
C	Hunan	2101	2101002	n	0	0	1935	some	lit	some	some	TRUE	TRUE	y	y	y	4	y	y	y	y	y	y	NA	NA	TRUE	TRUE	10	y	1955	NA	10
C	Hunan	2101	2101003	n	0	0	1942	some	lit	none	NA	TRUE	FALSE	y	n	n	1	y	n	n	n	y	n	NA	NA	FALSE	TRUE	15	n	1960	NA	3
C	Hunan	2101	2101008	n	0	0	1932	none	illit	none	none	TRUE	TRUE	y	n	y	1	y	y	y	y	y	n	NA	NA	TRUE	TRUE	7	y	1951	NA	12
C	Hunan	2101	2101009	n	0	0	1939	none	lit	NA	NA	TRUE	FALSE	y	n	n	4	y	n	y	n	y	n	NA	NA	FALSE	TRUE	8	y	1956	NA	9
C	Hunan	2101	2101010	n	0	0	1939	none	illit	none	none	TRUE	FALSE	y	n	n	4	y	n	y	n	y	n	NA	NA	FALSE	TRUE	16	y	1956	NA	1
C	Hunan	2101	2101011	n	0	0	1925	some	lit	none	none	TRUE	TRUE	y	y	y	3	y	y	y	y	y	n	NA	NA	TRUE	TRUE	5	y	1943	NA	13
C	Hunan	2101	2101012	n	0	0	1938	some	lit	none	none	TRUE	TRUE	n	y	n	0	n	y	n	n	y	n	NA	NA	FALSE	TRUE	7	n	1957	NA	12
C	Hunan	2101	2101013	n	0	0	1940	some	lit	none	none	TRUE	FALSE	y	y	y	2	y	n	n	n	y	n	NA	NA	FALSE	TRUE	13	y	1959	NA	6
C	Hunan	2101	2101014	n	0	0	1942	some	lit	none	NA	TRUE	FALSE	y	n	n	1	n	n	n	n	y	n	NA	NA	FALSE	TRUE	20	n	1962	NA	0
C	Hunan	2101	2101015	n	0	0	1940	some	lit	none	NA	FALSE	FALSE	y	y	y	4	n	n	n	n	n	n	NA	NA	FALSE	FALSE	20	n	1959	NA	-1
C	Hunan	2101	2101016	n	0	0	1941	some	lit	none	some	TRUE	TRUE	y	y	y	4	y	n	y	y	y	n	NA	NA	TRUE	TRUE	7	y	1957	NA	9
C	Hunan	2101	2101017	n	0	0	1937	none	lit	none	some	TRUE	FALSE	y	n	y	3	y	n	y	n	y	n	NA	NA	FALSE	TRUE	8.5	y	1953	NA	7.5
C	Hunan	2101	2101018	n	0	0	1936	some	lit	none	some	TRUE	TRUE	n	y	y	1	y	n	y	y	y	n	NA	NA	TRUE	TRUE	11	y	1953	NA	6
C	Hunan	2101	2101019	n	0	0	1935	some	lit	some	some	TRUE	FALSE	y	y	n	4	y	n	y	n	y	n	NA	NA	FALSE	TRUE	13	y	1953	NA	5
C	Hunan	2101	2101020	n	0	0	1940	none	illit	none	some	TRUE	FALSE	y	y	y	4	y	n	n	n	y	n	NA	NA	FALSE	TRUE	13	n	1958	NA	5
C	Hunan	2101	2101021	n	0	0	1927	none	illit	none	none	TRUE	FALSE	y	NA	NA	1	y	n	y	n	y	n	NA	NA	FALSE	TRUE	12.5	n	1944	NA	4.5
C	Hunan	2101	2101022	n	0	0	1935	some	lit	none	none	TRUE	TRUE	y	y	y	4	y	n	n	y	y	n	NA	NA	TRUE	TRUE	6	y	1952	NA	11
C	Hunan	2101	2101023	y	1	NA	1926	some	lit	none	some	TRUE	TRUE	y	y	y	4	y	n	n	y	y	n	NA	NA	TRUE	TRUE	11	y	1945	TRUE	8
C	Hunan	2101	2101025	n	0	0	1937	some	lit	NA	NA	TRUE	FALSE	y	NA	n	4	y	n	y	n	y	n	NA	NA	FALSE	TRUE	11	y	1957	NA	9
C	Hunan	2101	2101026	n	0	0	1931	none	illit	none	some	TRUE	FALSE	n	y	n	3	y	n	y	n	y	n	NA	NA	FALSE	TRUE	13	y	1949	NA	5
C	Hunan	2101	2101028	n	0	0	1930	none	illit	none	some	TRUE	FALSE	n	n	y	1	y	n	y	n	y	n	NA	NA	FALSE	TRUE	17	y	1948	NA	1
C	Hunan	2101	2101029	n	0	0	1930	none	illit	none	none	FALSE	FALSE	n	y	y	2	n	n	n	n	n	n	NA	NA	FALSE	FALSE	NA	y	1948	NA	NA
C	Hunan	2101	2101030	y	1	NA	1919	none	lit	none	some	TRUE	FALSE	n	y	y	4	y	n	y	n	y	n	NA	NA	FALSE	TRUE	8	y	1939	TRUE	12
C	Hunan	2101	2101032	n	0	0	1937	some	lit	none	some	TRUE	FALSE	n	y	y	NA	n	n	n	n	y	n	NA	NA	FALSE	TRUE	22.5	n	1957	NA	-2.5
C	Hunan	2101	2101034	n	0	0	1929	some	lit	none	none	TRUE	FALSE	y	y	y	4	y	n	y	n	y	n	NA	NA	FALSE	TRUE	13	y	1951	NA	9
C	Hunan	2101	2101035	y	1	NA	1919	none	lit	none	some	FALSE	FALSE	n	y	y	3	n	n	n	n	n	n	NA	NA	FALSE	FALSE	NA	y	1938	NA	NA
C	Hunan	2101	2101036	n	0	0	1936	none	illit	none	none	FALSE	FALSE	n	y	n	3	n	n	n	n	n	n	NA	NA	FALSE	FALSE	18	n	1952	NA	-2
C	Hunan	2101	2101037	n	0	0	1938	some	lit	none	some	FALSE	FALSE	n	y	n	4	n	n	n	n	n	n	NA	NA	FALSE	FALSE	16	y	1957	NA	3
C	Hunan	2101	2101038	n	0	0	1940	some	lit	none	some	TRUE	FALSE	y	y	n	4	y	n	n	n	y	n	NA	0.06	FALSE	TRUE	13	y	1956	NA	3
C	Hunan	2101	2101039	n	0	0	1941	some	lit	some	some	TRUE	FALSE	y	n	n	1	y	n	n	n	n	n	NA	0.5	FALSE	FALSE	NA	n	1961	NA	NA
C	Hunan	2101	2101040	n	0	0	1932	none	illit	none	none	TRUE	FALSE	y	y	n	4	y	n	y	n	y	n	NA	0.19	FALSE	TRUE	13	y	1951	NA	6
C	Hunan	2101	2101041	n	0	0	1934	none	illit	none	none	TRUE	TRUE	y	n	y	2	n	y	y	y	n	n	NA	0.22	TRUE	TRUE	12.5	y	1950	NA	3.5
C	Hunan	2101	2101043	n	0	0	1939	some	illit	none	none	TRUE	FALSE	y	n	n	4	y	n	n	n	y	n	NA	0.16	FALSE	TRUE	8	y	1957	NA	10
C	Hunan	2101	2101044	n	0	0	1942	some	illit	some	some	TRUE	FALSE	y	n	n	4	y	n	n	n	y	n	NA	0.06	FALSE	TRUE	12	y	1959	NA	5
C	Hunan	2101	2101045	n	0	0	1941	none	illit	none	some	TRUE	FALSE	y	y	n	4	y	n	n	n	y	n	NA	0.06	FALSE	TRUE	8	y	1955	NA	6
C	Hunan	2101	2101046	y	1	NA	1921	none	illit	none	none	TRUE	FALSE	y	y	y	NA	y	n	y	n	y	n	NA	NA	FALSE	TRUE	10	y	1938	TRUE	7
C	Hunan	2101	2101047	n	0	0	1933	none	illit	NA	NA	TRUE	FALSE	n	y	y	3	n	n	n	n	y	n	NA	NA	FALSE	TRUE	19	n	1952	NA	0
C	Hunan	2101	2101048	n	0	0	1932	some	half	none	NA	TRUE	FALSE	n	y	y	3	y	n	y	n	y	n	NA	NA	FALSE	TRUE	17	n	1950	NA	1
C	Hunan	2101	2101049	n	0	0	1941	some	illit	NA	NA	TRUE	TRUE	n	y	n	4	y	n	n	y	y	y	NA	NA	TRUE	TRUE	15	y	1958	NA	2
C	Hunan	2101	2101051	n	0	0	1938	some	lit	some	NA	TRUE	FALSE	y	y	y	4	y	n	y	n	y	n	NA	NA	FALSE	TRUE	9	y	1955	NA	8
C	Hunan	2101	2101052	n	0	0	1933	none	illit	none	none	TRUE	FALSE	y	NA	n	3	n	n	n	n	y	n	NA	NA	FALSE	TRUE	18	y	1950	NA	-1
C	Hunan	2101	2101053	n	0	0	1935	some	lit	NA	NA	TRUE	TRUE	y	n	y	3	y	n	n	y	y	n	NA	NA	TRUE	TRUE	6.5	y	1951	NA	9.5
C	Hunan	2101	2101054	y	1	1	1922	none	illit	NA	NA	TRUE	TRUE	n	y	n	3	y	n	y	y	y	n	NA	NA	TRUE	TRUE	8	n	1940	TRUE	10
C	Hunan	2101	2101064	n	0	0	1932	none	illit	none	some	TRUE	FALSE	n	y	y	4	y	n	y	n	n	n	NA	NA	FALSE	TRUE	9	y	1950	NA	9
C	Hunan	2101	2101065	n	0	0	1940	some	lit	NA	NA	NA	NA	NA	NA	n	NA	NA	NA	NA	NA	NA	NA	NA	NA	FALSE	FALSE	NA	NA	1959	NA	NA
C	Hunan	2101	2101066	y	1	NA	1932	none	illit	none	NA	TRUE	TRUE	n	NA	y	2	y	y	y	y	y	n	NA	0.5	TRUE	TRUE	9	y	1944	TRUE	3
C	Hunan	2101	2101067	n	0	0	1933	none	illit	none	none	NA	NA	NA	NA	n	3	NA	NA	NA	NA	NA	NA	NA	NA	FALSE	FALSE	7	NA	1951	NA	11
C	Hunan	2101	2101068	n	0	0	1938	NA	lit	none	some	TRUE	NA	y	y	y	4	y	y	y	y	y	NA	NA	0.25	TRUE	TRUE	10	y	1954	NA	6
C	Hunan	2101	2101069	n	0	0	1933	some	illit	NA	NA	TRUE	TRUE	y	n	n	4	y	n	y	y	y	n	NA	NA	TRUE	TRUE	13	y	1952	NA	6
C	Hunan	2101	2101071	n	0	0	1939	none	illit	none	none	TRUE	FALSE	y	y	y	3	n	n	n	n	y	n	NA	NA	FALSE	TRUE	NA	n	1957	NA	NA
C	Hunan	2101	2101072	n	0	0	1941	some	lit	none	none	TRUE	NA	y	y	y	4	y	y	n	n	y	NA	NA	0.23	FALSE	TRUE	8	y	1960	NA	11
C	Hunan	2101	2101073	n	0	0	1930	none	illit	none	none	NA	NA	n	n	n	1	y	n	y	n	NA	NA	NA	NA	FALSE	TRUE	6	n	1947	NA	11
C	Hunan	2101	2101075	n	0	0	1940	some	lit	none	none	FALSE	FALSE	y	n	n	3	n	n	n	n	n	n	NA	NA	FALSE	FALSE	NA	n	1958	NA	NA
C	Hunan	2101	2101076	y	1	NA	1921	some	half	none	NA	TRUE	NA	y	y	NA	4	y	n	y	y	y	NA	NA	0.25	TRUE	TRUE	6	y	1939	TRUE	12
C	Hunan	2101	2101077	n	0	0	1936	none	illit	none	NA	TRUE	FALSE	y	y	n	4	n	n	n	n	y	n	NA	NA	FALSE	TRUE	NA	n	1952	NA	NA
C	Hunan	2101	2101079	n	0	0	1929	none	illit	none	none	NA	NA	NA	NA	y	1	n	n	n	n	NA	NA	NA	NA	FALSE	FALSE	NA	n	1942	NA	NA
C	Hunan	2101	2101080	n	0	0	1934	none	illit	none	NA	TRUE	TRUE	y	y	y	2	y	n	y	y	y	n	NA	NA	TRUE	TRUE	8	y	1949	NA	7
C	Hunan	2101	2101081	n	0	0	1937	none	lit	none	none	NA	NA	NA	NA	n	3	NA	NA	NA	NA	NA	NA	NA	NA	FALSE	FALSE	NA	n	1951	NA	NA
C	Hunan	2101	2101082	n	0	0	1927	none	illit	none	NA	TRUE	TRUE	y	y	y	2	y	n	y	y	y	n	NA	NA	TRUE	TRUE	7	y	1947	NA	13
C	Hunan	2101	2101084	n	0	0	1935	some	lit	none	some	TRUE	FALSE	n	y	n	4	n	n	n	n	y	n	NA	NA	FALSE	TRUE	NA	n	1952	NA	NA
C	Hunan	2101	2101085	n	0	0	1934	none	illit	none	NA	TRUE	FALSE	y	y	y	4	y	n	y	n	y	n	NA	0.09	FALSE	TRUE	13	y	1954	NA	7
C	Hunan	2101	2101086	n	0	0	1939	some	lit	none	none	TRUE	NA	NA	y	y	2	y	n	y	n	y	NA	NA	0.09	FALSE	TRUE	NA	y	1959	NA	NA
C	Hunan	2101	2101087	n	0	0	1934	none	illit	none	NA	TRUE	FALSE	NA	y	y	4	y	n	y	n	y	n	NA	0.09	FALSE	TRUE	7	y	1952	NA	11
C	Hunan	2101	2101088	n	0	0	1929	none	illit	none	some	TRUE	FALSE	y	y	y	3	y	n	y	n	y	n	NA	0.03	FALSE	TRUE	7	y	1946	NA	10
C	Hunan	2101	2101089	n	0	0	1937	none	half	none	none	TRUE	FALSE	y	y	n	4	y	n	y	n	y	n	NA	NA	FALSE	TRUE	7	y	1954	NA	10
C	Hunan	2101	2101090	n	0	0	1935	none	illit	none	none	TRUE	NA	NA	y	y	3	n	y	y	y	y	NA	NA	NA	TRUE	TRUE	7	n	1954	NA	12
C	Hunan	2101	2101091	n	0	0	1938	some	half	none	NA	TRUE	FALSE	n	y	n	4	n	n	n	n	y	n	NA	NA	FALSE	TRUE	8	n	1956	NA	10
C	Hunan	2101	2101092	n	0	0	1936	some	lit	none	NA	TRUE	FALSE	y	n	y	4	n	n	y	n	y	n	NA	NA	FALSE	TRUE	NA	y	1961	NA	NA
C	Hunan	2101	2101093	n	0	0	1928	none	illit	none	NA	TRUE	NA	y	n	y	4	y	n	n	y	y	NA	NA	NA	TRUE	TRUE	7	y	1945	NA	10
C	Hunan	2101	2101094	n	0	0	1938	none	illit	none	none	TRUE	FALSE	n	n	y	2	y	n	n	n	y	n	NA	NA	FALSE	TRUE	NA	n	1956	NA	NA
C	Hunan	2101	2101095	n	0	0	1923	none	illit	none	some	TRUE	FALSE	y	y	y	4	y	n	y	n	y	n	NA	NA	FALSE	TRUE	12	y	1943	NA	8
C	Hunan	2101	2101097	y	1	NA	1933	none	illit	none	none	TRUE	FALSE	NA	y	y	1	y	n	n	n	y	n	NA	0.25	FALSE	TRUE	10	y	1952	TRUE	9
C	Hunan	2101	2101098	y	1	NA	1910	none	illit	none	none	NA	NA	NA	y	NA	NA	NA	NA	NA	NA	NA	NA	NA	NA	FALSE	FALSE	NA	NA	1928	NA	NA
C	Hunan	2101	2101099	NA	NA	NA	1942	none	illit	none	none	TRUE	FALSE	NA	NA	y	4	y	n	y	n	y	n	NA	NA	FALSE	TRUE	6	n	1959	NA	11
C	Hunan	2101	2101100	NA	NA	NA	1940	none	illit	none	none	TRUE	FALSE	y	y	NA	4	y	n	n	n	y	n	NA	NA	FALSE	TRUE	10	y	1959	NA	9
C	Hunan	2101	2101101	NA	NA	NA	1931	none	lit	none	none	TRUE	FALSE	y	y	y	4	y	n	y	n	y	n	NA	0.03	FALSE	TRUE	12	y	1949	NA	6
C	Hunan	2101	2101102	NA	NA	NA	1931	none	lit	none	none	FALSE	FALSE	n	y	y	4	n	n	n	n	n	n	NA	NA	FALSE	FALSE	NA	y	1948	NA	NA
C	Hunan	2101	2101103	NA	NA	NA	1939	some	half	none	NA	TRUE	FALSE	y	y	y	3	y	n	y	n	y	n	NA	NA	FALSE	TRUE	16	y	1956	NA	1
C	Hunan	2101	2101104	NA	NA	NA	1933	none	illit	none	none	NA	NA	NA	y	y	3	NA	NA	NA	NA	NA	NA	NA	NA	FALSE	FALSE	NA	n	1950	NA	NA
C	Hunan	2101	2101105	NA	NA	NA	1935	some	half	none	none	TRUE	NA	y	y	y	3	y	n	y	n	y	NA	NA	NA	FALSE	TRUE	12	y	1955	NA	8
C	Hunan	2101	2101106	NA	NA	NA	1930	some	lit	none	some	TRUE	NA	y	y	y	4	y	n	y	n	y	NA	NA	NA	FALSE	TRUE	12	y	1948	NA	6
C	Hunan	2101	2101107	NA	NA	NA	1931	none	half	none	some	TRUE	FALSE	n	y	NA	4	y	n	y	n	y	n	NA	NA	FALSE	TRUE	7	y	1951	NA	13
C	Hunan	2101	2101109	n	0	0	1938	some	lit	none	some	TRUE	TRUE	NA	y	y	4	y	y	y	y	y	n	NA	NA	TRUE	TRUE	7	n	1954	NA	9
C	Hunan	2101	2101110	n	0	0	1934	some	lit	none	NA	TRUE	FALSE	y	y	y	4	y	n	n	n	y	n	NA	NA	FALSE	TRUE	8	y	1951	NA	9
C	Hunan	2101	2101111	n	0	0	1936	none	illit	none	none	TRUE	TRUE	y	y	n	4	y	y	y	y	y	n	NA	NA	TRUE	TRUE	6	y	1953	NA	11
C	Hunan	2101	2101112	n	0	0	1937	some	lit	none	NA	TRUE	TRUE	y	y	y	2	y	y	y	y	y	n	NA	0.25	TRUE	TRUE	11	y	1955	NA	7
C	Hunan	2101	2101113	n	0	0	1934	none	illit	none	some	TRUE	TRUE	y	y	y	3	y	y	y	y	y	n	NA	NA	TRUE	TRUE	7	y	1950	NA	9
C	Hunan	2101	2101114	n	0	0	1935	some	lit	none	NA	TRUE	NA	y	y	y	4	y	y	y	y	y	NA	NA	NA	TRUE	TRUE	14	y	1952	NA	3
C	Hunan	2101	2101115	n	0	0	1942	some	lit	none	none	TRUE	TRUE	y	y	n	4	y	y	y	n	y	n	NA	0.19	FALSE	TRUE	6	n	1961	NA	13
C	Hunan	2101	2101116	n	0	0	1940	some	lit	NA	some	TRUE	TRUE	y	y	n	1	y	n	y	y	y	n	NA	NA	TRUE	TRUE	12	n	1957	NA	5
C	Hunan	2101	2101118	n	0	0	1927	none	illit	none	some	TRUE	FALSE	y	y	y	4	y	n	y	n	y	n	NA	NA	FALSE	TRUE	11	y	1949	NA	11
C	Hunan	2101	2101119	n	0	0	1928	none	illit	none	some	TRUE	FALSE	y	y	y	4	y	n	y	n	y	n	NA	NA	FALSE	TRUE	15	n	1946	NA	3
C	Hunan	2101	2101120	n	0	0	1934	none	illit	none	some	TRUE	TRUE	y	y	y	4	y	n	y	y	y	n	NA	0.5	TRUE	TRUE	15	y	1956	NA	7
C	Hunan	2101	2101121	n	0	0	1940	none	illit	none	none	TRUE	TRUE	y	n	y	4	y	y	y	y	y	n	NA	NA	TRUE	TRUE	9	n	1958	NA	9
C	Hunan	2101	2101122	n	0	0	1933	some	half	some	some	TRUE	TRUE	y	y	y	2	y	n	y	y	y	n	NA	NA	TRUE	TRUE	15	y	1951	NA	3
C	Hunan	2101	2101123	n	0	0	1938	none	illit	none	NA	TRUE	TRUE	n	y	n	4	y	n	y	y	y	n	NA	NA	TRUE	TRUE	7	y	1958	NA	13
C	Hunan	2101	2101124	n	0	0	1934	some	lit	NA	none	TRUE	NA	y	y	n	4	y	n	y	y	y	NA	NA	NA	TRUE	TRUE	17	y	1953	NA	2
C	Hunan	2101	2101125	n	0	0	1932	none	illit	some	some	TRUE	FALSE	y	y	y	4	y	n	y	n	y	n	NA	NA	FALSE	TRUE	12	y	1949	NA	5
C	Hunan	2101	2101126	y	1	NA	1935	none	illit	none	some	TRUE	TRUE	n	y	y	4	y	n	y	y	y	n	NA	NA	TRUE	TRUE	5	y	1953	TRUE	13
C	Hunan	2101	2101127	n	0	0	1931	none	illit	none	none	TRUE	TRUE	y	y	y	1	y	y	y	y	y	n	NA	NA	TRUE	TRUE	5	y	1951	NA	15
C	Hunan	2101	2101128	n	0	0	1926	none	illit	none	some	TRUE	TRUE	y	n	y	4	y	n	y	y	y	n	NA	NA	TRUE	TRUE	9	y	1946	NA	11
C	Hunan	2101	2101129	n	0	0	1927	none	illit	none	none	TRUE	TRUE	y	y	n	4	y	n	y	y	y	n	NA	NA	TRUE	TRUE	7	y	1946	NA	12
C	Hunan	2101	2101130	n	0	0	1932	none	illit	none	some	TRUE	TRUE	y	n	y	1	y	y	y	y	y	y	NA	NA	TRUE	TRUE	8	y	1953	NA	13
C	Hunan	2101	2101131	n	0	0	1936	none	illit	none	some	TRUE	TRUE	y	y	n	1	y	y	y	y	y	n	NA	NA	TRUE	TRUE	6	y	1955	NA	13
C	Hunan	2101	2101132	n	0	0	1935	none	illit	some	some	TRUE	TRUE	y	y	n	1	y	y	n	n	y	n	NA	NA	FALSE	TRUE	8	n	1953	NA	10
C	Hunan	2101	2101133	n	0	0	1939	some	half	none	none	TRUE	TRUE	y	n	n	2	y	n	y	y	y	n	NA	NA	TRUE	TRUE	12	y	1956	NA	5
C	Hunan	2101	2101134	n	0	0	1942	some	lit	none	some	TRUE	FALSE	y	y	y	4	y	n	y	n	y	n	NA	NA	FALSE	TRUE	18	y	1960	NA	0
C	Hunan	2101	2101135	n	0	0	1931	some	lit	none	NA	TRUE	FALSE	y	y	n	3	y	n	y	n	y	n	NA	NA	FALSE	TRUE	14	y	1949	NA	4
C	Hunan	2101	2101136	n	0	0	1939	some	lit	NA	some	TRUE	FALSE	y	n	y	4	y	n	n	n	y	n	NA	NA	FALSE	TRUE	19	y	1958	NA	0
C	Hunan	2101	2101137	n	0	0	1929	none	illit	none	none	TRUE	FALSE	y	y	y	4	y	n	y	n	y	n	NA	NA	FALSE	TRUE	8	y	1950	NA	13
C	Hunan	2101	2101138	n	0	0	1937	some	lit	none	none	TRUE	TRUE	n	y	n	4	n	n	y	y	y	n	NA	NA	TRUE	TRUE	NA	y	1954	NA	NA
C	Hunan	2101	2101139	n	0	0	1935	none	illit	none	none	TRUE	TRUE	y	n	y	1	y	n	y	n	y	y	NA	NA	TRUE	TRUE	9	n	1950	NA	6
C	Hunan	2101	2101140	n	0	0	1928	none	half	none	some	TRUE	TRUE	y	y	n	4	y	y	y	y	y	n	NA	NA	TRUE	TRUE	16	n	1947	NA	3
C	Hunan	2101	2101141	y	1	1	1930	none	illit	none	some	TRUE	TRUE	n	y	n	4	y	y	y	y	n	n	NA	NA	TRUE	TRUE	7	n	1948	TRUE	11
C	Hunan	2101	2101142	n	0	0	1938	none	illit	none	none	TRUE	TRUE	n	y	y	2	y	y	n	n	y	n	NA	0.25	FALSE	TRUE	11	n	1954	NA	5
C	Hunan	2101	2101143	n	0	0	1926	none	illit	none	some	TRUE	TRUE	y	y	n	1	y	y	y	n	y	n	NA	0.25	FALSE	TRUE	7	y	1945	NA	12
C	Hunan	2101	2101145	n	0	0	1927	some	half	none	some	TRUE	TRUE	y	y	y	4	y	y	y	y	y	n	NA	0.41	TRUE	TRUE	8	y	1948	NA	13
C	Hunan	2101	2101146	n	0	0	1935	none	illit	none	some	TRUE	FALSE	y	y	y	4	y	n	y	n	y	n	NA	0.19	FALSE	TRUE	11	y	1952	NA	6
C	Hunan	2101	2101147	n	0	0	1924	none	illit	none	none	TRUE	FALSE	y	y	n	4	y	n	y	n	y	n	NA	0.13	FALSE	TRUE	10	y	1945	NA	11
C	Hunan	2101	2101148	n	0	0	1939	some	lit	none	none	TRUE	TRUE	y	n	y	4	n	y	n	n	y	n	NA	0.19	FALSE	TRUE	6	y	1960	NA	15
C	Hunan	2101	2101149	n	0	0	1941	none	illit	none	some	TRUE	TRUE	y	y	n	4	y	y	n	n	y	n	NA	0.13	FALSE	TRUE	10	y	1958	NA	7
C	Hunan	2101	2101150	y	1	NA	1933	some	illit	NA	NA	TRUE	FALSE	n	y	y	3	y	n	y	n	n	n	NA	NA	FALSE	TRUE	7	y	1952	TRUE	12
C	Hunan	2101	2101151	y	1	1	1936	some	half	NA	NA	TRUE	FALSE	y	y	n	3	y	n	y	n	y	n	NA	NA	FALSE	TRUE	7	y	1956	TRUE	13
C	Hunan	2101	2101152	n	0	0	1942	some	lit	none	none	FALSE	FALSE	n	n	y	3	n	n	n	n	n	n	NA	NA	FALSE	FALSE	NA	y	1958	NA	NA
C	Hunan	2101	2101153	NA	NA	NA	1940	none	illit	none	none	NA	NA	n	y	y	4	y	n	NA	NA	y	n	NA	NA	FALSE	TRUE	10	y	1960	NA	10
C	Hunan	2101	2101154	n	0	0	1939	some	illit	none	none	TRUE	TRUE	n	n	n	4	n	y	y	y	y	n	NA	0.19	TRUE	TRUE	7	y	1954	NA	8
C	Hunan	2101	2101155	n	0	0	1940	some	half	none	some	TRUE	FALSE	y	n	n	4	y	n	n	n	y	n	NA	0.19	FALSE	TRUE	13	n	1960	NA	7
C	Hunan	2101	2101156	n	0	0	1938	some	half	none	none	TRUE	TRUE	y	y	y	4	y	y	n	n	y	n	NA	0.41	FALSE	TRUE	7	y	1957	NA	12
C	Hunan	2101	2101157	n	0	0	1938	some	lit	some	some	TRUE	FALSE	y	y	n	4	n	n	n	n	y	n	NA	NA	FALSE	TRUE	NA	y	1959	NA	NA
C	Hunan	2101	2101158	n	0	0	1935	some	half	none	none	TRUE	TRUE	y	y	n	3	n	y	n	y	y	n	NA	0.13	TRUE	TRUE	12	y	1952	NA	5
C	Hunan	2101	2101159	n	0	0	1938	some	half	none	none	TRUE	TRUE	y	y	n	4	y	y	n	n	n	n	NA	0.13	FALSE	FALSE	12	y	1956	NA	6
C	Hunan	2101	2101161	n	0	0	1938	some	lit	none	none	TRUE	TRUE	y	n	n	1	y	y	y	y	y	n	NA	NA	TRUE	TRUE	15	n	1960	NA	7
C	Hunan	2101	2101162	n	0	0	1930	none	illit	none	some	TRUE	TRUE	y	n	y	4	y	n	y	n	y	y	NA	NA	TRUE	TRUE	6	n	1946	NA	10
C	Hunan	2101	2101163	n	0	0	1940	some	lit	none	none	TRUE	FALSE	y	y	n	3	y	n	y	n	y	n	NA	NA	FALSE	TRUE	13	n	1957	NA	4
C	Hunan	2101	2101164	n	0	0	1941	some	half	none	some	TRUE	FALSE	y	n	y	4	y	n	n	n	y	n	NA	NA	FALSE	TRUE	13	n	1959	NA	5
C	Hunan	2101	2101165	n	0	0	1937	none	illit	none	none	TRUE	FALSE	y	y	y	4	y	n	n	n	y	n	NA	NA	FALSE	TRUE	12	y	1959	NA	10
C	Hunan	2101	2101166	n	0	0	1936	none	illit	none	some	TRUE	FALSE	y	n	y	3	y	n	y	n	y	n	NA	NA	FALSE	TRUE	13	n	1957	NA	8
C	Hunan	2101	2101167	n	0	0	1936	none	illit	some	NA	TRUE	NA	n	y	y	4	y	n	y	n	y	NA	NA	NA	FALSE	TRUE	13	y	1953	NA	4
C	Hunan	2101	2101168	n	0	0	1934	none	illit	NA	NA	TRUE	FALSE	y	n	n	4	y	n	n	n	y	n	NA	NA	FALSE	TRUE	11	y	1950	NA	5
C	Hunan	2101	2101169	n	0	0	1931	none	illit	none	NA	NA	NA	y	n	n	3	y	n	NA	NA	y	n	NA	NA	FALSE	TRUE	10	n	1953	NA	12
C	Hunan	2101	2101172	n	0	0	1929	some	half	none	some	TRUE	NA	n	y	y	4	y	n	y	n	y	NA	NA	NA	FALSE	TRUE	13	y	1948	NA	6
C	Hunan	2101	2101173	n	0	0	1933	none	illit	none	none	TRUE	FALSE	y	y	n	3	y	n	n	n	y	n	NA	NA	FALSE	TRUE	11	y	1950	NA	6
C	Hunan	2101	2101174	n	0	0	1937	none	illit	none	none	TRUE	FALSE	y	y	y	3	y	n	y	n	y	n	NA	NA	FALSE	TRUE	12	y	1955	NA	6
C	Hunan	2101	2101176	n	0	0	1927	some	half	none	some	TRUE	FALSE	y	y	y	1	y	n	y	n	y	n	NA	NA	FALSE	TRUE	11	y	1947	NA	9
C	Hunan	2101	2101177	n	0	0	1939	some	half	none	none	TRUE	FALSE	y	y	y	1	y	n	n	n	y	n	NA	NA	FALSE	TRUE	5	y	1956	NA	12
C	Hunan	2101	2101178	n	0	0	1936	none	illit	none	none	NA	NA	NA	y	y	1	NA	NA	NA	NA	NA	NA	NA	NA	FALSE	FALSE	6	y	1954	NA	12
C	Hunan	2101	2101179	n	0	0	1942	some	lit	none	none	TRUE	FALSE	y	y	y	1	y	n	n	n	y	n	NA	NA	FALSE	TRUE	10	y	1961	NA	9
C	Hunan	2101	2101181	n	0	0	1936	some	half	none	NA	TRUE	FALSE	y	n	n	4	y	n	y	n	y	n	NA	NA	FALSE	TRUE	8	y	1955	NA	11
C	Hunan	2101	2101184	n	0	0	1934	some	half	none	some	TRUE	FALSE	y	n	n	2	y	n	y	n	y	n	NA	NA	FALSE	TRUE	17	y	1955	NA	4
C	Hunan	2101	2101185	n	0	0	1929	some	lit	none	none	TRUE	TRUE	y	y	y	4	y	n	y	y	y	n	NA	NA	TRUE	TRUE	13	y	1949	NA	7
C	Hunan	2101	2101186	n	0	0	1942	none	illit	none	none	TRUE	FALSE	y	y	y	4	n	n	n	n	y	n	NA	NA	FALSE	TRUE	21	y	1962	NA	-1
C	Hunan	2101	2101187	n	0	0	1941	some	lit	some	none	TRUE	FALSE	y	n	y	1	n	n	n	n	y	n	NA	NA	FALSE	TRUE	NA	n	1958	NA	NA
C	Hunan	2101	2101188	n	0	0	1933	some	half	none	some	TRUE	FALSE	y	y	y	3	y	n	y	n	y	n	NA	NA	FALSE	TRUE	11	y	1952	NA	8
C	Hunan	2101	2101189	n	0	0	1928	none	illit	none	none	NA	NA	NA	y	y	NA	n	n	n	n	NA	NA	NA	NA	FALSE	FALSE	7	n	1946	NA	11
C	Hunan	2101	2101190	n	0	0	1941	none	illit	none	NA	TRUE	FALSE	y	y	y	4	y	n	y	n	y	n	NA	NA	FALSE	TRUE	6	y	1961	NA	14
C	Hunan	2101	2101191	n	0	0	1937	some	lit	NA	NA	TRUE	FALSE	y	n	n	3	y	n	y	n	y	n	NA	NA	FALSE	TRUE	16	y	1960	NA	7
C	Hunan	2101	2101192	n	0	0	1937	some	half	none	some	TRUE	FALSE	y	y	y	4	y	n	n	n	y	n	NA	NA	FALSE	TRUE	11	y	1956	NA	8
C	Hunan	2101	2101193	n	0	0	1935	none	illit	none	NA	TRUE	FALSE	y	n	y	3	y	n	n	n	y	n	NA	NA	FALSE	TRUE	12	n	1952	NA	5
C	Hunan	2101	2101194	n	0	0	1932	some	half	none	none	TRUE	FALSE	y	y	y	4	y	n	y	n	y	n	NA	NA	FALSE	TRUE	7	y	1947	NA	8
C	Hunan	2101	2101195	n	0	0	1937	some	lit	NA	NA	TRUE	FALSE	y	y	n	4	y	n	y	n	y	n	NA	NA	FALSE	TRUE	10	y	1957	NA	10
C	Hunan	2101	2101196	n	0	0	1932	none	half	NA	NA	TRUE	FALSE	y	y	n	3	y	n	n	n	y	n	NA	NA	FALSE	TRUE	11	n	1946	NA	3
C	Hunan	2101	2101197	n	0	0	1939	none	illit	none	none	TRUE	FALSE	y	y	y	3	y	n	n	n	n	n	NA	NA	FALSE	FALSE	NA	n	1954	NA	NA
C	Hunan	2101	2101198	n	0	0	1937	none	illit	none	none	NA	NA	n	y	n	0	y	n	n	n	NA	NA	NA	NA	FALSE	FALSE	13	n	1951	NA	1
C	Hunan	2101	2101200	n	0	0	1940	some	lit	none	some	TRUE	FALSE	y	y	n	3	y	n	y	n	y	n	NA	NA	FALSE	TRUE	9	y	1962	NA	13
C	Hunan	2101	2101201	n	0	0	1924	some	half	none	none	TRUE	TRUE	y	y	y	1	y	n	y	y	y	n	NA	NA	TRUE	TRUE	8	y	1946	NA	14
C	Hunan	2101	2101202	n	0	0	1935	some	illit	none	none	TRUE	FALSE	n	n	y	1	y	n	n	n	y	n	NA	NA	FALSE	TRUE	10	y	1956	NA	11
C	Hunan	2101	2101203	n	0	0	1933	some	lit	none	none	TRUE	FALSE	y	y	y	2	n	n	n	n	y	n	NA	NA	FALSE	TRUE	NA	y	1952	NA	NA
C	Hunan	2101	2101204	n	0	0	1939	some	lit	none	none	TRUE	FALSE	y	y	y	3	y	n	n	n	y	n	NA	NA	FALSE	TRUE	8	y	1964	NA	17
C	Hunan	2101	2101205	n	0	0	1942	none	illit	NA	NA	TRUE	FALSE	y	n	y	4	y	n	n	n	y	n	NA	NA	FALSE	TRUE	13	n	1956	NA	1
C	Hunan	2101	2101206	y	1	1	1929	none	illit	none	some	TRUE	FALSE	y	y	y	1	y	n	y	n	y	n	NA	NA	FALSE	TRUE	6	y	1946	TRUE	11
C	Hunan	2101	2101207	n	0	0	1937	none	illit	some	some	TRUE	FALSE	y	y	y	2	y	n	y	n	y	n	NA	NA	FALSE	TRUE	6	y	1954	NA	11
C	Hunan	2101	2101208	n	0	0	1935	none	half	NA	NA	TRUE	FALSE	n	y	y	1	y	n	y	n	y	n	NA	NA	FALSE	TRUE	17	y	1953	NA	1
C	Hunan	2101	2101209	n	0	0	1933	none	illit	none	some	TRUE	FALSE	y	y	y	3	y	n	y	n	y	n	NA	NA	FALSE	TRUE	11	y	1947	NA	3
C	Hunan	2101	2101211	n	0	0	1926	none	illit	NA	NA	NA	NA	NA	y	y	NA	y	n	n	n	NA	NA	NA	NA	FALSE	FALSE	12	NA	1947	NA	9
C	Hunan	2101	2101213	n	0	0	1937	none	illit	NA	NA	TRUE	FALSE	y	n	n	2	y	n	y	n	y	n	NA	NA	FALSE	TRUE	12	y	1957	NA	8
C	Hunan	2102	2102001	n	0	0	1930	some	lit	NA	NA	TRUE	FALSE	y	NA	NA	2	n	n	n	n	y	n	y	NA	FALSE	TRUE	15	n	1948	NA	3
C	Hunan	2102	2102002	n	0	0	1937	some	lit	none	some	TRUE	FALSE	y	y	y	2	n	n	n	n	y	n	y	NA	FALSE	TRUE	21	n	1956	NA	-2
C	Hunan	2102	2102003	n	0	0	1940	none	lit	none	none	TRUE	FALSE	y	y	n	2	y	n	n	n	y	n	y	0.13	FALSE	TRUE	11	n	1962	NA	11
C	Hunan	2102	2102004	n	0	0	1929	none	illit	none	none	FALSE	FALSE	n	n	y	NA	n	n	n	n	n	n	n	NA	FALSE	FALSE	NA	n	1945	NA	NA
C	Hunan	2102	2102005	n	0	0	1936	none	illit	none	none	FALSE	FALSE	n	y	NA	2	n	n	n	n	n	n	y	NA	FALSE	FALSE	NA	NA	1955	NA	NA
C	Hunan	2102	2102006	n	0	0	1939	none	illit	none	NA	TRUE	FALSE	y	y	n	2	y	n	n	n	y	n	n	0.09	FALSE	TRUE	20	n	1961	NA	2
C	Hunan	2102	2102007	n	0	0	1933	none	illit	none	none	FALSE	FALSE	y	n	n	2	n	n	n	n	n	n	y	NA	FALSE	FALSE	18	n	1951	NA	0
C	Hunan	2102	2102008	n	0	0	1941	none	lit	none	none	FALSE	FALSE	n	y	n	2	n	n	n	n	n	n	n	NA	FALSE	FALSE	22	n	1962	NA	-1
C	Hunan	2102	2102009	n	0	0	1940	some	lit	none	none	TRUE	FALSE	y	y	y	2	y	n	n	n	y	n	y	0.13	FALSE	TRUE	11	n	1960	NA	9
C	Hunan	2102	2102010	n	0	0	1938	some	lit	none	NA	TRUE	FALSE	y	y	y	2	y	n	n	n	y	n	y	0.22	FALSE	TRUE	13	n	1959	NA	8
C	Hunan	2102	2102011	n	0	0	1935	none	illit	none	NA	TRUE	FALSE	NA	y	NA	2	y	n	n	n	n	n	y	NA	FALSE	FALSE	12.5	n	1955	NA	7.5
C	Hunan	2102	2102012	n	0	0	1938	some	lit	none	some	TRUE	FALSE	y	n	y	2	y	n	n	n	y	n	y	0.13	FALSE	TRUE	18	y	1956	NA	0
C	Hunan	2102	2102013	y	1	NA	1922	none	illit	none	none	TRUE	FALSE	y	y	y	2	y	n	n	n	y	n	y	NA	FALSE	TRUE	16	n	1944	TRUE	6
C	Hunan	2102	2102014	n	0	0	1933	none	illit	none	NA	FALSE	FALSE	y	y	y	2	n	n	n	n	n	n	n	NA	FALSE	FALSE	18	n	1950	NA	-1
C	Hunan	2102	2102015	n	0	0	1935	none	illit	NA	NA	TRUE	FALSE	y	y	y	2	n	n	n	n	y	n	n	NA	FALSE	TRUE	NA	n	1955	NA	NA
C	Hunan	2102	2102016	n	0	0	1936	none	lit	none	NA	FALSE	FALSE	n	y	n	NA	n	n	n	n	n	n	y	NA	FALSE	FALSE	15	n	1950	NA	-1
C	Hunan	2102	2102017	n	0	0	1936	none	illit	none	none	TRUE	FALSE	n	y	y	2	y	n	n	n	n	n	y	0.28	FALSE	FALSE	7	n	1951	NA	8
C	Hunan	2102	2102018	y	1	NA	1930	none	illit	NA	NA	NA	NA	NA	y	y	NA	NA	NA	NA	NA	NA	NA	NA	NA	FALSE	FALSE	NA	NA	NA	NA	NA
C	Hunan	2102	2102019	n	0	0	1929	none	illit	none	none	FALSE	FALSE	n	y	y	2	n	n	n	n	n	n	y	NA	FALSE	FALSE	32.5	n	1949	NA	-12.5
C	Hunan	2102	2102020	n	0	0	1938	some	lit	none	none	TRUE	FALSE	y	y	y	2	n	n	n	n	y	n	y	NA	FALSE	TRUE	NA	n	1957	NA	NA
C	Hunan	2102	2102021	y	1	NA	1931	none	lit	none	NA	TRUE	FALSE	y	y	y	2	y	n	n	n	y	n	y	0.19	FALSE	TRUE	11	n	1951	TRUE	9
C	Hunan	2102	2102022	y	1	NA	1926	none	lit	NA	NA	TRUE	TRUE	y	y	y	2	y	y	y	y	y	n	y	0.5	TRUE	TRUE	10	n	1943	TRUE	7
C	Hunan	2102	2102023	n	0	0	1935	none	illit	NA	NA	TRUE	TRUE	y	y	y	2	y	n	n	n	y	y	y	0.19	TRUE	TRUE	12.5	n	1953	NA	5.5
C	Hunan	2102	2102024	n	0	0	1932	none	illit	none	none	TRUE	FALSE	n	y	y	2	y	n	n	n	n	n	y	0.13	FALSE	FALSE	10	n	1951	NA	9
C	Hunan	2102	2102025	n	0	0	1936	some	lit	none	some	TRUE	FALSE	y	y	y	2	y	n	n	n	y	n	y	0.19	FALSE	TRUE	12.5	n	1955	NA	6.5
C	Hunan	2102	2102026	n	0	0	1932	none	illit	none	NA	TRUE	FALSE	y	y	y	2	n	n	n	n	y	n	y	NA	FALSE	TRUE	NA	n	1949	NA	NA
C	Hunan	2102	2102027	n	0	0	1925	none	illit	none	none	TRUE	FALSE	y	y	n	2	y	n	n	n	n	n	y	0.19	FALSE	FALSE	12.5	n	1945	NA	7.5
C	Hunan	2102	2102028	n	0	0	1928	none	half	none	none	TRUE	TRUE	y	y	y	NA	y	n	y	y	y	n	n	0.5	TRUE	TRUE	10	n	1945	NA	7
C	Hunan	2102	2102029	y	1	NA	1920	none	illit	NA	NA	TRUE	FALSE	NA	y	n	NA	y	n	n	n	y	n	y	NA	FALSE	TRUE	NA	n	1940	NA	NA
C	Hunan	2102	2102030	y	1	NA	1928	none	illit	none	none	TRUE	FALSE	y	y	n	2	n	n	n	n	y	n	y	NA	FALSE	TRUE	NA	n	NA	NA	NA
C	Hunan	2102	2102031	n	0	0	1927	none	illit	none	none	TRUE	FALSE	y	y	n	2	y	n	n	n	y	n	n	0.16	FALSE	TRUE	12.5	n	1945	NA	5.5
C	Hunan	2102	2102032	n	0	0	1927	some	lit	none	NA	FALSE	FALSE	n	y	y	2	n	n	n	n	n	n	y	NA	FALSE	FALSE	17	n	1945	NA	1
C	Hunan	2102	2102033	n	0	0	1930	none	lit	none	none	TRUE	FALSE	y	y	y	2	y	n	n	n	y	n	y	0.16	FALSE	TRUE	7.5	n	1950	NA	12.5
C	Hunan	2102	2102034	n	0	0	1937	none	illit	NA	NA	TRUE	FALSE	NA	y	y	2	y	n	n	n	y	n	y	0.16	FALSE	TRUE	15	n	NA	NA	NA
C	Hunan	2102	2102035	n	0	0	1940	some	lit	none	none	TRUE	FALSE	y	y	y	2	n	n	n	n	y	n	y	NA	FALSE	TRUE	23	n	1963	NA	0
C	Hunan	2102	2102036	n	0	0	1937	none	illit	none	NA	TRUE	FALSE	y	y	y	2	y	n	n	n	y	n	y	NA	FALSE	TRUE	22	n	1955	NA	-4
C	Hunan	2102	2102037	n	0	0	1940	some	lit	none	none	TRUE	FALSE	y	y	y	2	y	n	n	n	y	n	n	0.16	FALSE	TRUE	12.5	n	1962	NA	9.5
C	Hunan	2102	2102038	n	0	0	1939	none	lit	none	none	FALSE	FALSE	y	y	y	2	n	n	n	n	n	n	y	NA	FALSE	FALSE	NA	n	1957	NA	NA
C	Hunan	2102	2102039	n	0	0	1935	none	illit	none	none	TRUE	FALSE	y	y	y	2	n	n	n	n	y	n	y	NA	FALSE	TRUE	10	n	1951	NA	6
C	Hunan	2102	2102040	n	0	0	1935	none	lit	none	some	TRUE	TRUE	y	y	n	2	y	n	n	n	y	y	y	0.16	TRUE	TRUE	7	n	1952	NA	10
C	Hunan	2102	2102041	n	0	0	1939	some	lit	none	none	TRUE	FALSE	n	y	n	2	n	n	n	n	y	n	n	NA	FALSE	TRUE	23	n	1957	NA	-5
C	Hunan	2102	2102042	y	1	NA	1928	none	illit	none	NA	FALSE	FALSE	n	y	y	2	n	n	n	n	n	n	n	NA	FALSE	FALSE	NA	n	1945	NA	NA
C	Hunan	2102	2102043	n	0	0	1935	none	illit	none	some	FALSE	FALSE	n	y	NA	2	n	n	n	n	n	n	y	NA	FALSE	FALSE	NA	n	NA	NA	NA
C	Hunan	2102	2102044	y	1	1	1926	none	illit	none	none	TRUE	FALSE	y	y	y	2	y	n	n	n	y	n	n	0.13	FALSE	TRUE	10	n	1945	TRUE	9
C	Hunan	2102	2102045	n	0	0	1937	none	illit	none	none	TRUE	FALSE	y	y	y	2	y	n	n	n	y	n	y	0.13	FALSE	TRUE	10	n	1957	NA	10
C	Hunan	2102	2102046	n	0	0	1940	some	half	some	some	FALSE	FALSE	n	y	y	2	n	n	n	n	n	n	n	NA	FALSE	FALSE	19	n	1955	NA	-4
C	Hunan	2102	2102047	n	0	0	1939	none	illit	none	some	TRUE	TRUE	y	y	y	2	y	n	n	n	y	y	y	0.13	TRUE	TRUE	NA	n	1958	NA	-2
C	Hunan	2102	2102048	y	1	NA	1921	none	illit	none	some	TRUE	TRUE	y	y	y	NA	n	n	n	n	y	y	n	NA	TRUE	TRUE	22	n	1940	TRUE	-3
C	Hunan	2102	2102049	n	0	0	1941	none	half	none	none	NA	NA	n	y	y	2	NA	NA	n	n	n	n	y	NA	FALSE	FALSE	NA	n	1958	NA	NA
C	Hunan	2102	2102050	n	0	0	1932	none	half	none	some	TRUE	FALSE	y	y	y	2	y	n	n	n	y	n	y	0.06	FALSE	TRUE	10	y	1950	NA	8
C	Hunan	2102	2102051	n	0	0	1933	none	illit	none	some	TRUE	FALSE	n	y	y	2	y	n	n	n	y	n	y	0.19	FALSE	TRUE	12	n	1951	NA	6
C	Hunan	2102	2102052	n	0	0	1938	none	illit	none	none	TRUE	FALSE	n	y	y	2	y	n	n	n	y	n	y	0.06	FALSE	TRUE	15	NA	1956	NA	3
C	Hunan	2102	2102053	n	0	0	1939	none	illit	none	none	TRUE	FALSE	y	y	y	2	y	n	n	n	y	n	y	0.19	FALSE	TRUE	10	n	1965	NA	16
C	Hunan	2102	2102054	n	0	0	1937	none	half	none	none	NA	NA	NA	y	y	NA	NA	NA	NA	NA	NA	NA	NA	NA	FALSE	FALSE	NA	NA	1953	NA	NA
C	Hunan	2102	2102055	n	0	0	1942	none	illit	some	none	TRUE	TRUE	n	y	y	2	y	y	y	y	n	y	y	0.41	TRUE	TRUE	9	y	1967	NA	16
C	Hunan	2102	2102056	n	0	0	1933	none	illit	none	none	FALSE	FALSE	n	n	y	2	n	n	n	n	n	n	y	NA	FALSE	FALSE	18	n	1951	NA	0
C	Hunan	2102	2102057	y	1	NA	1930	none	illit	none	none	TRUE	TRUE	y	y	NA	2	y	y	n	n	n	y	n	0.41	TRUE	FALSE	10	y	1948	TRUE	8
C	Hunan	2102	2102058	n	0	0	1940	none	half	some	some	TRUE	FALSE	y	y	y	2	y	n	n	n	n	n	y	0.06	FALSE	FALSE	10	n	1957	NA	7
C	Hunan	2102	2102059	y	1	NA	1931	some	half	some	some	TRUE	TRUE	y	y	y	2	y	n	n	y	y	n	y	0.03	TRUE	TRUE	10	y	1949	TRUE	8
C	Hunan	2102	2102060	n	0	0	1934	some	lit	NA	NA	TRUE	TRUE	y	y	y	NA	y	n	n	n	y	y	y	0.25	TRUE	TRUE	10	n	1950	NA	6
C	Hunan	2102	2102061	n	0	0	1937	some	lit	none	none	TRUE	TRUE	y	y	n	2	n	n	n	n	y	y	y	NA	TRUE	TRUE	NA	n	1957	NA	NA
C	Hunan	2102	2102062	n	0	0	1940	some	half	none	none	FALSE	FALSE	y	y	n	2	n	n	n	n	n	n	y	NA	FALSE	FALSE	NA	n	1959	NA	NA
C	Hunan	2102	2102063	n	0	0	1938	none	illit	some	none	TRUE	FALSE	y	y	y	2	y	n	n	n	n	n	n	0.06	FALSE	FALSE	15	n	1956	NA	3
C	Hunan	2102	2102064	n	0	0	1933	none	illit	none	none	NA	NA	y	y	y	2	NA	NA	n	n	n	n	y	NA	FALSE	FALSE	NA	n	1950	NA	NA
C	Hunan	2102	2102065	n	0	0	1930	none	half	none	some	TRUE	TRUE	y	y	y	2	y	n	n	n	y	y	y	0.25	TRUE	TRUE	10	n	1951	NA	11
C	Hunan	2102	2102066	n	0	0	1937	none	half	none	none	TRUE	FALSE	y	y	y	NA	y	n	n	n	y	n	y	0.06	FALSE	TRUE	10	n	1957	NA	10
C	Hunan	2102	2102067	n	0	0	1936	some	lit	none	none	TRUE	FALSE	y	y	y	2	y	n	n	n	y	n	y	0.41	FALSE	TRUE	8	n	1955	NA	11
C	Hunan	2102	2102068	y	1	1	1914	none	illit	none	none	TRUE	TRUE	y	y	NA	2	y	y	n	n	y	n	y	0.41	FALSE	TRUE	10	n	1933	TRUE	9
C	Hunan	2102	2102069	n	0	0	1924	none	half	none	none	TRUE	FALSE	n	y	n	2	y	n	n	n	y	n	n	0.03	FALSE	TRUE	10	n	1944	NA	10
C	Hunan	2102	2102070	n	0	0	1935	some	lit	NA	some	TRUE	TRUE	y	y	y	2	y	n	y	y	n	n	n	NA	TRUE	TRUE	10	y	1956	NA	11
C	Hunan	2102	2102071	y	1	1	1929	some	half	some	NA	TRUE	FALSE	y	y	n	2	y	n	n	n	n	n	y	0.09	FALSE	FALSE	10	n	1948	TRUE	9
C	Hunan	2102	2102072	n	0	0	1929	none	illit	NA	NA	NA	NA	NA	y	n	NA	NA	NA	NA	NA	NA	NA	NA	NA	FALSE	FALSE	12	NA	1947	NA	6
C	Hunan	2102	2102073	n	0	0	1931	none	illit	none	some	FALSE	FALSE	y	y	y	NA	n	n	n	n	n	n	n	NA	FALSE	FALSE	NA	n	1951	NA	NA
C	Hunan	2102	2102074	n	0	0	1936	none	half	none	some	TRUE	TRUE	n	y	y	2	y	n	y	y	y	y	y	0.25	TRUE	TRUE	11	y	1954	NA	7
C	Hunan	2102	2102075	n	0	0	1936	none	half	none	NA	TRUE	FALSE	y	y	y	NA	y	n	n	n	y	n	y	0.13	FALSE	TRUE	14	n	1956	NA	6
C	Hunan	2102	2102076	n	0	0	1939	none	half	none	some	TRUE	FALSE	y	n	y	2	y	n	n	n	n	n	y	NA	FALSE	FALSE	10	n	1954	NA	5
C	Hunan	2102	2102077	y	1	NA	1931	none	half	none	none	TRUE	TRUE	y	y	n	2	y	y	n	n	y	n	y	0.06	FALSE	TRUE	5	n	1948	TRUE	12
C	Hunan	2102	2102078	n	0	0	1938	none	illit	none	some	TRUE	TRUE	y	y	y	2	y	n	n	n	y	y	y	0.23	TRUE	TRUE	6	n	1956	NA	12
C	Hunan	2102	2102079	n	0	0	1940	some	half	some	some	TRUE	FALSE	y	y	y	2	y	n	n	n	y	n	y	0.41	FALSE	TRUE	10	n	1963	NA	13
C	Hunan	2102	2102081	y	1	NA	1932	some	half	NA	some	TRUE	FALSE	y	y	n	2	y	n	n	n	y	n	n	0.22	FALSE	TRUE	13	n	1948	NA	3
C	Hunan	2102	2102082	n	0	0	1936	none	half	none	some	TRUE	FALSE	y	y	n	2	y	n	n	n	y	n	y	0.25	FALSE	TRUE	11	n	1954	NA	7
C	Hunan	2102	2102083	y	1	NA	1927	none	half	none	none	TRUE	FALSE	n	y	y	2	y	n	n	n	y	n	y	0.13	FALSE	TRUE	10	n	1943	NA	6
C	Hunan	2102	2102084	n	0	0	1931	none	half	none	none	TRUE	FALSE	NA	y	y	2	y	n	n	n	y	n	y	0.13	FALSE	TRUE	10	n	1952	NA	11
C	Hunan	2102	2102085	y	1	NA	1937	some	lit	none	some	TRUE	FALSE	y	y	y	2	y	n	y	n	y	n	y	0.06	FALSE	TRUE	11	n	1953	NA	5
C	Hunan	2102	2102086	n	0	0	1937	none	illit	none	none	TRUE	TRUE	y	y	n	2	y	n	n	n	y	y	n	0.25	TRUE	TRUE	14	n	1954	NA	3
C	Hunan	2102	2102087	n	0	0	1939	none	lit	none	some	TRUE	FALSE	y	y	y	2	y	n	n	n	y	n	y	0.31	FALSE	TRUE	10	y	1956	NA	7
C	Hunan	2102	2102088	n	0	0	1934	none	illit	none	none	TRUE	FALSE	y	y	y	2	y	n	n	n	y	n	y	0.5	FALSE	TRUE	9	n	1951	NA	8
C	Hunan	2102	2102089	n	0	0	1933	none	illit	none	NA	TRUE	FALSE	NA	y	n	2	y	n	n	n	y	n	n	0.06	FALSE	TRUE	10	n	1949	NA	6
C	Hunan	2102	2102090	n	0	0	1940	none	lit	some	none	TRUE	FALSE	n	y	y	2	n	n	n	n	y	n	n	NA	FALSE	TRUE	20	n	1960	NA	0
C	Hunan	2102	2102091	n	0	0	1941	none	half	some	some	TRUE	FALSE	y	n	n	2	y	n	n	n	y	n	n	0.25	FALSE	TRUE	10	n	1961	NA	10
C	Hunan	2102	2102092	y	1	1	1924	none	half	none	none	NA	NA	y	y	n	2	y	n	NA	NA	y	n	y	1	FALSE	TRUE	10	n	1942	TRUE	8
C	Hunan	2102	2102093	n	0	0	1933	none	half	none	none	TRUE	FALSE	NA	y	n	2	y	n	n	n	y	n	y	0.19	FALSE	TRUE	7	n	1958	NA	18
C	Hunan	2102	2102094	n	0	0	1935	none	half	none	none	TRUE	FALSE	n	y	y	2	y	n	y	n	y	n	n	0.44	FALSE	TRUE	10	n	1956	NA	11
C	Hunan	2102	2102095	n	0	0	1931	none	half	none	none	TRUE	FALSE	NA	y	y	2	y	n	n	n	y	n	n	0.31	FALSE	TRUE	NA	n	1947	NA	-1
C	Hunan	2102	2102096	n	0	0	1933	none	half	none	none	TRUE	FALSE	n	y	y	2	y	n	n	n	y	n	y	0.5	FALSE	TRUE	10	n	1951	NA	8
C	Hunan	2102	2102097	n	0	0	1932	none	illit	none	none	TRUE	FALSE	y	y	n	2	y	n	n	n	y	n	y	0.94	FALSE	TRUE	12	n	1950	NA	6
C	Hunan	2102	2102098	n	0	0	1929	none	illit	none	none	TRUE	FALSE	y	y	n	2	y	n	n	n	y	n	n	0.5	FALSE	TRUE	6	n	1950	NA	15
C	Hunan	2102	2102099	n	0	0	1937	some	lit	NA	NA	TRUE	FALSE	y	NA	n	2	y	n	n	n	n	n	n	0.19	FALSE	FALSE	10	n	1956	NA	9
C	Hunan	2102	2102100	n	0	0	1937	none	half	some	none	TRUE	FALSE	y	y	y	2	y	n	n	n	y	n	y	0.13	FALSE	TRUE	10	n	1957	NA	10
C	Hunan	2102	2102101	n	0	0	1935	none	half	none	some	NA	FALSE	n	n	n	2	NA	n	n	n	y	n	n	NA	FALSE	TRUE	17	n	1952	NA	0
C	Hunan	2102	2102102	n	0	0	1928	none	half	none	none	TRUE	FALSE	y	y	n	2	y	n	n	n	y	n	n	1	FALSE	TRUE	15	n	1946	NA	3
C	Hunan	2102	2102103	n	0	0	1938	none	half	none	none	TRUE	FALSE	y	y	y	2	y	n	n	n	n	n	n	0.19	FALSE	FALSE	17	n	1955	NA	0
C	Hunan	2102	2102104	y	1	1	1921	none	illit	none	none	TRUE	FALSE	n	y	y	2	y	n	n	n	y	n	y	0.38	FALSE	TRUE	17	n	1939	TRUE	1
C	Hunan	2102	2102105	n	0	0	1935	none	illit	NA	NA	TRUE	FALSE	y	NA	n	2	y	n	n	n	y	n	n	0.19	FALSE	TRUE	10	n	1954	NA	9
C	Hunan	2102	2102106	n	0	0	1942	some	lit	none	none	TRUE	FALSE	y	y	n	2	y	n	n	n	y	n	y	NA	FALSE	TRUE	12	n	1964	NA	10
C	Hunan	2102	2102107	n	0	0	1939	none	illit	NA	none	TRUE	FALSE	y	y	n	2	y	n	n	n	y	n	n	0.5	FALSE	TRUE	NA	n	1954	NA	-1
C	Hunan	2102	2102108	n	0	0	1942	some	lit	none	some	FALSE	FALSE	n	y	n	2	n	n	n	n	n	n	n	NA	FALSE	FALSE	20	n	1963	NA	1
C	Hunan	2102	2102109	n	0	0	1938	some	lit	none	none	TRUE	FALSE	n	y	y	2	y	n	n	n	y	n	n	0.13	FALSE	TRUE	10	n	1956	NA	8
C	Hunan	2102	2102110	n	0	0	1938	some	lit	none	none	TRUE	FALSE	NA	y	y	2	n	n	n	n	y	n	y	NA	FALSE	TRUE	20	n	1957	NA	-1
C	Hunan	2102	2102111	y	1	1	1927	none	half	none	none	TRUE	FALSE	n	y	n	2	y	n	n	n	y	n	n	0.5	FALSE	TRUE	10	n	1942	TRUE	5
C	Hunan	2102	2102112	n	0	0	1936	none	half	none	none	TRUE	FALSE	y	y	y	2	y	n	n	n	y	n	n	NA	FALSE	TRUE	6	n	1954	NA	12
C	Hunan	2102	2102113	n	0	0	1940	none	half	none	none	TRUE	FALSE	y	y	n	2	y	n	n	n	y	n	n	0.38	FALSE	TRUE	17	n	1959	NA	2
C	Hunan	2102	2102114	n	0	0	1930	none	illit	none	none	TRUE	FALSE	n	y	n	2	n	n	n	n	y	n	n	NA	FALSE	TRUE	NA	n	1946	NA	NA
C	Hunan	2102	2102115	n	0	0	1939	none	half	none	NA	TRUE	FALSE	n	y	y	2	y	n	n	n	y	n	y	0.09	FALSE	TRUE	10	n	1955	NA	6
C	Hunan	2102	2102116	n	0	0	1926	none	half	none	none	TRUE	FALSE	n	y	NA	2	y	n	n	n	y	n	y	NA	FALSE	TRUE	6	n	1941	NA	9
C	Hunan	2102	2102117	n	0	0	1933	none	half	none	none	TRUE	FALSE	NA	n	n	2	n	n	n	n	y	n	n	NA	FALSE	TRUE	NA	n	1949	NA	NA
C	Hunan	2102	2102118	n	0	0	1930	none	half	none	none	TRUE	FALSE	n	y	y	2	y	n	n	n	y	n	n	0.38	FALSE	TRUE	12	n	1946	NA	4
C	Hunan	2102	2102119	n	0	0	1934	none	half	none	none	FALSE	FALSE	n	y	n	2	n	n	n	n	n	n	y	NA	FALSE	FALSE	10	n	1950	NA	6
C	Hunan	2102	2102120	n	0	0	1940	none	illit	none	none	TRUE	FALSE	y	y	n	2	y	n	n	n	y	n	y	0.09	FALSE	TRUE	10	n	1956	NA	6
C	Hunan	2102	2102122	y	1	NA	1933	some	lit	none	some	FALSE	FALSE	n	y	y	2	n	n	n	n	n	n	n	NA	FALSE	FALSE	NA	n	1952	TRUE	NA
C	Hunan	2102	2102123	n	0	0	1940	some	lit	none	none	TRUE	TRUE	n	n	y	2	y	y	n	n	n	n	y	NA	FALSE	FALSE	NA	n	1956	NA	NA
C	Hunan	2102	2102124	n	0	0	1937	some	lit	none	none	FALSE	FALSE	n	y	y	2	n	n	n	n	n	n	n	NA	FALSE	FALSE	NA	n	1956	NA	NA
C	Hunan	2102	2102125	n	0	0	1934	none	illit	none	none	TRUE	FALSE	y	y	n	2	y	n	n	n	n	n	y	0.19	FALSE	FALSE	NA	n	1951	NA	NA
C	Hunan	2102	2102126	n	0	0	1936	none	illit	none	none	FALSE	FALSE	y	y	y	2	n	n	n	n	n	n	n	NA	FALSE	FALSE	NA	n	1953	NA	NA
C	Hunan	2102	2102127	n	0	0	1936	some	lit	some	some	TRUE	FALSE	y	y	y	2	y	n	n	n	n	n	y	0.13	FALSE	FALSE	NA	n	1955	NA	NA
C	Hunan	2102	2102128	n	0	0	1923	none	illit	none	some	TRUE	FALSE	y	y	n	2	y	n	n	n	n	n	n	NA	FALSE	FALSE	23	n	1939	NA	-7
C	Hunan	2102	2102129	n	0	0	1938	none	half	none	none	TRUE	FALSE	y	y	y	2	y	n	n	n	y	n	y	0.22	FALSE	TRUE	15	n	1954	NA	1
C	Hunan	2102	2102130	n	0	0	1939	some	half	none	some	FALSE	FALSE	y	n	y	2	n	n	n	n	n	n	n	NA	FALSE	FALSE	NA	n	1957	NA	NA
C	Hunan	2102	2102131	n	0	0	1938	none	illit	none	none	TRUE	FALSE	y	y	y	2	y	n	n	n	n	n	y	0.22	FALSE	FALSE	13	n	1956	NA	5
C	Hunan	2102	2102132	n	0	0	1940	none	half	none	some	TRUE	FALSE	y	n	n	2	y	n	n	n	n	n	y	NA	FALSE	FALSE	15	n	1958	NA	3
C	Hunan	2102	2102133	n	0	0	1937	none	illit	none	none	TRUE	FALSE	n	NA	n	2	y	n	n	n	n	n	y	0.13	FALSE	FALSE	16	n	1957	NA	4
C	Hunan	2102	2102134	n	0	0	1929	none	illit	none	none	TRUE	TRUE	y	y	n	2	y	n	n	n	y	y	y	0.25	TRUE	TRUE	11	n	1952	NA	12
C	Hunan	2102	2102135	n	0	0	1938	none	half	none	some	FALSE	FALSE	n	y	y	2	n	n	n	n	n	n	n	NA	FALSE	FALSE	NA	n	1957	NA	NA
C	Hunan	2102	2102136	n	0	0	1939	some	lit	none	some	FALSE	FALSE	n	y	y	2	n	n	n	n	n	n	n	NA	FALSE	FALSE	NA	n	1959	NA	NA
C	Hunan	2102	2102138	n	0	0	1938	none	half	some	some	FALSE	FALSE	y	y	y	2	n	n	n	n	n	n	y	0.22	FALSE	FALSE	15	n	1964	NA	11
C	Hunan	2102	2102139	n	0	0	1937	none	illit	none	some	TRUE	FALSE	y	y	y	2	y	n	n	n	y	n	n	0.5	FALSE	TRUE	15	n	1956	NA	4
C	Hunan	2102	2102140	n	0	0	1922	none	illit	none	none	NA	TRUE	y	y	n	2	NA	y	n	n	n	n	y	NA	FALSE	FALSE	14	n	1944	NA	8
C	Hunan	2102	2102142	n	0	0	1938	none	illit	none	none	TRUE	TRUE	y	y	y	2	n	n	n	n	y	y	n	NA	TRUE	TRUE	NA	n	1960	NA	NA
C	Hunan	2102	2102143	n	0	0	1936	none	illit	none	none	TRUE	FALSE	y	y	n	2	y	n	n	n	n	n	y	NA	FALSE	FALSE	12	n	1961	NA	13
C	Hunan	2102	2102144	n	0	0	1930	none	illit	some	some	TRUE	TRUE	y	y	y	2	y	n	n	n	y	y	y	0.31	TRUE	TRUE	14	n	1950	NA	6
C	Hunan	2102	2102145	n	0	0	1938	none	illit	none	none	FALSE	FALSE	y	n	y	2	n	n	n	n	n	n	n	NA	FALSE	FALSE	NA	n	1957	NA	NA
C	Hunan	2102	2102146	n	0	0	1933	none	illit	none	none	FALSE	FALSE	n	y	y	2	n	n	n	n	n	n	n	NA	FALSE	FALSE	NA	n	1949	NA	NA
C	Hunan	2102	2102147	n	0	0	1939	none	half	none	some	FALSE	FALSE	y	y	y	2	n	n	n	n	n	n	y	NA	FALSE	FALSE	20	n	1956	NA	-3
C	Hunan	2102	2102148	n	0	0	1929	none	illit	none	some	NA	TRUE	y	y	y	2	NA	y	n	n	NA	y	y	NA	TRUE	FALSE	NA	n	1946	NA	NA
C	Hunan	2102	2102149	n	0	0	1939	none	illit	none	some	TRUE	FALSE	NA	y	y	2	y	n	n	n	n	n	y	0.41	FALSE	FALSE	NA	n	1959	NA	NA
C	Hunan	2102	2102150	n	0	0	1938	none	illit	none	none	TRUE	FALSE	y	n	y	2	y	n	n	n	y	n	y	0.13	FALSE	TRUE	15	n	1958	NA	5
C	Hunan	2102	2102151	n	0	0	1940	some	half	none	none	TRUE	FALSE	y	y	n	2	y	n	n	n	n	n	y	0.16	FALSE	FALSE	NA	n	1957	NA	NA
C	Hunan	2102	2102152	n	0	0	1937	none	illit	none	some	TRUE	FALSE	n	y	n	2	y	n	n	n	y	n	y	0.13	FALSE	TRUE	14	n	1953	NA	2
C	Hunan	2102	2102153	n	0	0	1933	none	illit	none	none	TRUE	FALSE	n	y	y	2	y	n	n	n	n	n	y	0.13	FALSE	FALSE	NA	n	1950	NA	NA
C	Hunan	2102	2102154	n	0	0	1937	none	illit	none	none	TRUE	FALSE	y	y	y	2	y	n	n	n	n	n	y	NA	FALSE	FALSE	16	n	1953	NA	0
C	Hunan	2102	2102155	n	0	0	1925	none	illit	none	some	TRUE	FALSE	n	y	y	2	y	n	n	n	n	n	y	0.25	FALSE	FALSE	NA	n	1947	NA	NA
C	Hunan	2102	2102156	n	0	0	1938	some	lit	none	some	NA	FALSE	y	n	y	2	y	n	n	n	NA	n	y	1	FALSE	FALSE	13	n	1963	NA	12
C	Hunan	2102	2102157	n	0	0	1926	some	half	none	none	NA	FALSE	n	y	n	NA	n	n	n	n	NA	n	y	NA	FALSE	FALSE	NA	n	1944	NA	NA
C	Hunan	2102	2102158	n	0	0	1939	none	illit	none	none	TRUE	FALSE	y	y	y	2	y	n	n	n	n	n	y	NA	FALSE	FALSE	12	n	1957	NA	6
C	Hunan	2102	2102159	n	0	0	1937	some	half	none	some	TRUE	FALSE	y	NA	y	2	y	n	n	n	y	n	y	0.13	FALSE	TRUE	14	n	1954	NA	3
C	Hunan	2102	2102160	n	0	0	1934	some	half	none	none	TRUE	FALSE	y	y	y	2	y	n	n	n	n	n	y	NA	FALSE	FALSE	7	n	1948	NA	7
C	Hunan	2102	2102161	n	0	0	1932	none	half	none	some	FALSE	FALSE	y	y	y	2	n	n	n	n	n	n	y	NA	FALSE	FALSE	NA	n	1949	NA	NA
C	Hunan	2102	2102162	n	0	0	1933	none	illit	none	none	FALSE	FALSE	n	y	y	2	n	n	n	n	n	n	n	NA	FALSE	FALSE	NA	n	1947	NA	NA
C	Hunan	2102	2102163	n	0	0	1928	none	half	none	none	TRUE	FALSE	y	y	y	2	y	n	n	n	y	n	y	0.13	FALSE	TRUE	12	n	1945	NA	5
C	Hunan	2102	2102164	n	0	0	1939	none	illit	none	none	NA	FALSE	y	y	n	2	n	n	n	n	NA	n	n	NA	FALSE	FALSE	NA	n	1959	NA	NA
C	Hunan	2102	2102165	n	0	0	1941	none	illit	none	none	TRUE	FALSE	y	y	y	2	y	n	n	n	y	n	y	0.13	FALSE	TRUE	NA	n	1959	NA	NA
C	Hunan	2102	2102166	n	0	0	1937	some	lit	none	some	TRUE	FALSE	y	y	y	2	y	n	n	n	n	n	y	0.5	FALSE	FALSE	NA	n	1955	NA	NA
C	Hunan	2102	2102167	n	0	0	1930	none	illit	none	none	TRUE	FALSE	y	y	y	2	y	n	y	n	y	n	y	0.25	FALSE	TRUE	NA	y	1952	NA	NA
C	Hunan	2102	2102168	n	0	0	1935	none	illit	some	none	TRUE	FALSE	n	y	y	2	n	n	n	n	y	n	n	NA	FALSE	TRUE	NA	n	1952	NA	NA
C	Hunan	2102	2102169	y	1	NA	1929	none	illit	some	some	TRUE	FALSE	y	y	y	2	y	n	n	n	y	n	y	0.5	FALSE	TRUE	7	n	1941	TRUE	5
C	Hunan	2102	2102170	n	0	0	1936	none	illit	none	some	NA	NA	NA	y	y	2	NA	NA	n	n	NA	NA	y	NA	FALSE	FALSE	13	n	1956	NA	7
C	Hunan	2102	2102171	y	1	1	1925	none	half	none	some	TRUE	FALSE	y	y	y	2	n	n	y	n	y	n	n	NA	FALSE	TRUE	NA	n	1946	TRUE	NA
C	Hunan	2102	2102173	y	1	1	1930	none	illit	NA	NA	TRUE	TRUE	y	y	y	NA	y	y	n	n	y	n	n	0.5	FALSE	TRUE	5.5	n	1948	TRUE	12.5
C	Hunan	2102	2102174	n	0	0	1929	none	illit	none	NA	FALSE	FALSE	y	y	NA	NA	n	n	n	n	n	n	n	NA	FALSE	FALSE	NA	n	1945	NA	NA
C	Hunan	2102	2102175	n	0	0	1942	none	half	NA	NA	TRUE	TRUE	y	y	n	2	n	n	n	n	y	y	n	NA	TRUE	TRUE	NA	n	1958	NA	NA
C	Hunan	2102	2102176	n	0	0	1928	none	half	none	none	FALSE	FALSE	y	y	n	2	n	n	n	n	n	n	y	NA	FALSE	FALSE	21	n	1944	NA	-5
C	Hunan	2102	2102177	n	0	0	1941	some	half	none	none	TRUE	FALSE	y	y	NA	2	n	n	n	n	y	n	y	NA	FALSE	TRUE	NA	n	1958	NA	NA
C	Hunan	2102	2102178	n	0	0	1935	some	lit	some	some	FALSE	FALSE	n	y	y	2	n	n	n	n	n	n	n	NA	FALSE	FALSE	NA	n	1953	NA	NA
C	Hunan	2102	2102179	n	0	0	1939	some	lit	NA	some	TRUE	TRUE	y	NA	n	2	y	n	n	n	y	y	n	NA	TRUE	TRUE	10	n	1965	NA	16
C	Hunan	2102	2102180	y	1	1	1935	none	illit	none	NA	TRUE	FALSE	y	y	n	NA	y	n	n	n	y	n	n	0.09	FALSE	TRUE	8	n	1956	TRUE	13
C	Hunan	2102	2102181	n	0	0	1940	none	half	none	some	TRUE	FALSE	y	y	y	2	y	n	n	n	y	n	y	0.09	FALSE	TRUE	10.5	n	1961	NA	10.5
C	Hunan	2102	2102182	y	1	NA	1928	none	half	none	NA	TRUE	TRUE	y	y	n	2	y	n	n	n	y	y	y	0.16	TRUE	TRUE	7.5	n	1949	TRUE	13.5
C	Hunan	2102	2102183	n	0	0	1941	some	lit	none	none	TRUE	TRUE	n	y	y	NA	n	n	n	n	y	y	y	NA	TRUE	TRUE	NA	y	1963	NA	NA
C	Hunan	2102	2102184	n	0	0	1932	none	half	NA	NA	FALSE	FALSE	n	NA	NA	2	n	n	n	n	n	n	y	NA	FALSE	FALSE	NA	n	1948	NA	NA
C	Hunan	2102	2102185	y	1	NA	1933	none	illit	none	none	TRUE	FALSE	y	y	y	2	y	n	n	n	y	n	y	0.19	FALSE	TRUE	15	n	1950	TRUE	2
C	Hunan	2102	2102186	n	0	0	1928	none	illit	none	NA	TRUE	FALSE	n	y	y	2	y	n	n	n	y	n	y	0.09	FALSE	TRUE	12.5	n	1942	NA	1.5
C	Hunan	2102	2102187	n	0	0	1929	none	half	NA	NA	TRUE	TRUE	n	NA	y	2	n	n	n	n	y	y	n	NA	TRUE	TRUE	NA	n	1949	NA	NA
C	Hunan	2102	2102188	n	0	0	1934	none	illit	none	NA	TRUE	FALSE	y	y	y	2	y	n	n	n	y	n	y	0.09	FALSE	TRUE	15	n	1952	NA	3
C	Hunan	2102	2102189	n	0	0	1937	none	illit	none	NA	FALSE	FALSE	n	n	y	2	n	n	n	n	n	n	n	NA	FALSE	FALSE	NA	n	1953	NA	NA
C	Hunan	2102	2102190	n	0	0	1937	none	half	none	none	TRUE	FALSE	n	y	y	2	y	n	n	n	y	n	y	0.09	FALSE	TRUE	10.5	n	1954	NA	6.5
C	Hunan	2102	2102191	n	0	0	1935	none	illit	none	none	TRUE	FALSE	n	y	y	2	n	n	n	n	y	n	y	NA	FALSE	TRUE	15	n	1951	NA	1
C	Hunan	2102	2102192	n	0	0	1930	none	half	none	NA	TRUE	FALSE	y	y	y	2	y	n	n	n	y	n	n	0.22	FALSE	TRUE	12	n	1950	NA	8
C	Hunan	2102	2102193	n	0	0	1925	none	illit	none	NA	TRUE	FALSE	n	y	n	2	n	n	n	n	y	n	n	NA	FALSE	TRUE	45	n	1941	NA	-29
C	Hunan	2102	2102195	n	0	0	1932	some	lit	none	NA	TRUE	FALSE	n	y	n	2	n	n	n	n	y	n	n	NA	FALSE	TRUE	NA	n	1950	NA	NA
C	Hunan	2102	2102196	n	0	0	1926	some	lit	none	some	TRUE	TRUE	n	y	y	2	y	y	n	n	y	n	y	0.06	FALSE	TRUE	16	n	1944	NA	2
C	Hunan	2102	2102197	n	0	0	1937	some	lit	none	some	TRUE	FALSE	n	y	n	NA	n	n	n	n	y	n	y	NA	FALSE	TRUE	7.5	n	1954	NA	9.5
C	Hunan	2102	2102199	n	0	0	1938	none	half	some	some	TRUE	FALSE	y	y	n	2	y	n	n	n	y	n	n	0.19	FALSE	TRUE	16	n	1957	NA	3
C	Hunan	2102	2102200	n	0	0	1940	none	illit	none	none	TRUE	FALSE	y	y	n	2	n	n	n	n	y	n	y	NA	FALSE	TRUE	NA	n	1959	NA	NA
C	Hunan	2102	2102201	n	0	0	1932	none	illit	none	none	FALSE	FALSE	y	y	y	2	n	n	n	n	n	n	y	NA	FALSE	FALSE	16	n	1948	NA	0
C	Hunan	2102	2102202	n	0	0	1937	none	half	none	none	TRUE	FALSE	y	y	y	2	y	n	n	n	y	n	y	0.25	FALSE	TRUE	12	n	1954	NA	5
C	Hunan	2102	2102203	n	0	0	1936	none	half	NA	none	TRUE	FALSE	y	y	y	2	y	n	n	n	y	n	y	0.5	FALSE	TRUE	12	n	1956	NA	8
C	Hunan	2102	2102205	NA	NA	NA	1936	none	half	none	none	TRUE	FALSE	y	NA	NA	2	y	n	n	n	y	n	y	0.06	FALSE	TRUE	14.5	n	1956	NA	5.5
C	Jiangxi	2301	2301001	y	1	NA	1934	none	illit	none	some	TRUE	FALSE	y	y	n	4	n	n	n	n	y	n	y	NA	FALSE	TRUE	NA	n	1952	TRUE	NA
C	Jiangxi	2301	2301002	n	0	0	1933	some	half	none	none	FALSE	FALSE	n	n	y	NA	n	n	n	n	n	n	n	NA	FALSE	FALSE	NA	n	1949	NA	NA
C	Jiangxi	2301	2301003	n	0	0	1934	none	half	none	none	TRUE	FALSE	y	y	n	0	n	n	n	n	y	n	n	NA	FALSE	TRUE	NA	n	1950	NA	NA
C	Jiangxi	2301	2301004	n	0	0	1941	none	illit	none	none	FALSE	FALSE	y	y	n	3	n	n	n	n	n	n	NA	NA	FALSE	FALSE	NA	y	1959	NA	NA
C	Jiangxi	2301	2301005	n	0	0	1937	none	illit	none	none	TRUE	TRUE	y	y	NA	4	y	y	n	n	y	n	y	NA	FALSE	TRUE	5.5	n	1960	NA	17.5
C	Jiangxi	2301	2301006	n	0	0	1935	none	illit	none	none	TRUE	TRUE	n	y	n	1	n	y	n	n	y	n	y	0.13	FALSE	TRUE	7.5	n	1953	NA	10.5
C	Jiangxi	2301	2301007	n	0	0	1933	none	illit	none	none	TRUE	TRUE	n	y	y	4	y	y	n	n	y	n	y	0.14	FALSE	TRUE	8	n	1953	NA	12
C	Jiangxi	2301	2301008	y	1	1	1920	none	illit	none	some	FALSE	TRUE	y	y	n	1	n	y	n	n	n	n	y	0.13	FALSE	FALSE	7	n	1946	TRUE	19
C	Jiangxi	2301	2301009	n	0	0	1934	none	illit	none	NA	TRUE	TRUE	y	y	n	4	y	y	n	n	y	n	y	0.25	FALSE	TRUE	8.5	n	1953	NA	10.5
C	Jiangxi	2301	2301010	n	0	0	1935	none	illit	none	none	TRUE	FALSE	y	y	y	3	y	n	n	n	y	n	y	NA	FALSE	TRUE	NA	n	1957	NA	NA
C	Jiangxi	2301	2301011	n	0	0	1936	none	illit	none	none	TRUE	TRUE	y	n	NA	3	n	y	n	n	y	n	y	0.31	FALSE	TRUE	8.5	n	1953	NA	8.5
C	Jiangxi	2301	2301012	n	0	0	1932	none	illit	none	none	TRUE	FALSE	n	y	y	1	y	n	n	n	y	n	n	NA	FALSE	TRUE	NA	n	1950	NA	NA
C	Jiangxi	2301	2301013	y	1	1	1935	none	illit	none	none	TRUE	FALSE	y	y	NA	3	y	n	n	n	y	n	n	NA	FALSE	TRUE	NA	n	1954	TRUE	NA
C	Jiangxi	2301	2301014	n	0	0	1941	none	illit	none	none	TRUE	FALSE	y	y	NA	4	y	n	n	n	y	n	y	NA	FALSE	TRUE	14.5	n	1959	NA	3.5
C	Jiangxi	2301	2301015	n	0	0	1939	none	illit	none	none	TRUE	FALSE	y	n	n	4	y	n	n	n	y	n	y	NA	FALSE	TRUE	14.5	n	1959	NA	5.5
C	Jiangxi	2301	2301016	n	0	0	1941	none	illit	NA	NA	TRUE	FALSE	n	NA	n	4	y	n	n	n	y	n	n	NA	FALSE	TRUE	NA	n	1960	NA	NA
C	Jiangxi	2301	2301018	n	0	0	1934	none	illit	none	none	TRUE	FALSE	n	NA	n	1	n	n	n	n	y	n	n	NA	FALSE	TRUE	NA	n	1954	NA	NA
C	Jiangxi	2301	2301019	n	0	0	1938	none	illit	none	none	TRUE	FALSE	y	y	n	2	y	n	n	n	y	n	n	NA	FALSE	TRUE	NA	n	1958	NA	NA
C	Jiangxi	2301	2301020	y	1	NA	1921	none	illit	none	none	TRUE	TRUE	y	y	n	3	y	y	n	n	y	n	y	NA	FALSE	TRUE	14.5	n	1939	TRUE	3.5
C	Jiangxi	2301	2301021	n	0	0	1939	none	illit	none	some	FALSE	FALSE	y	y	NA	1	n	n	n	n	n	n	n	NA	FALSE	FALSE	NA	n	1959	NA	NA
C	Jiangxi	2301	2301022	n	0	0	1935	none	illit	none	none	FALSE	FALSE	n	NA	n	1	n	n	n	n	n	n	n	NA	FALSE	FALSE	NA	n	1953	NA	NA
C	Jiangxi	2301	2301023	n	0	0	1940	none	illit	none	none	TRUE	TRUE	y	y	y	3	y	y	n	n	n	n	y	0.31	FALSE	FALSE	16.5	n	1962	NA	5.5
C	Jiangxi	2301	2301025	y	1	NA	1933	none	illit	none	some	TRUE	TRUE	y	y	NA	3	y	y	n	y	y	n	y	0.28	TRUE	TRUE	7.5	y	1953	TRUE	12.5
C	Jiangxi	2301	2301026	n	0	0	1934	some	lit	none	some	TRUE	FALSE	n	y	n	1	y	n	n	n	y	n	n	NA	FALSE	TRUE	NA	n	1955	NA	NA
C	Jiangxi	2301	2301027	n	0	0	1925	none	illit	none	none	FALSE	FALSE	y	y	NA	3	n	n	n	n	n	n	n	NA	FALSE	FALSE	NA	n	1944	NA	NA
C	Jiangxi	2301	2301028	n	0	0	1940	some	half	some	some	TRUE	TRUE	n	y	NA	1	y	y	n	n	y	n	NA	0.33	FALSE	TRUE	13	n	1960	NA	7
C	Jiangxi	2301	2301029	n	0	0	1939	none	illit	none	none	TRUE	FALSE	n	y	y	2	y	n	n	n	n	n	y	NA	FALSE	FALSE	NA	n	1956	NA	NA
C	Jiangxi	2301	2301030	n	0	0	1935	none	illit	none	none	TRUE	FALSE	y	y	y	1	y	n	n	n	y	n	y	NA	FALSE	TRUE	NA	n	1954	NA	NA
C	Jiangxi	2301	2301031	n	0	0	1937	some	lit	none	none	TRUE	FALSE	n	y	n	3	y	n	n	n	n	n	n	NA	FALSE	FALSE	NA	n	1956	NA	NA
C	Jiangxi	2301	2301032	n	0	0	1941	none	illit	none	none	TRUE	FALSE	y	y	NA	3	y	n	n	n	y	n	y	0.33	FALSE	TRUE	NA	n	1959	NA	NA
C	Jiangxi	2301	2301033	y	1	1	1920	none	illit	none	none	TRUE	FALSE	y	y	NA	4	y	n	n	n	y	n	y	0.13	FALSE	TRUE	13	n	1937	TRUE	4
C	Jiangxi	2301	2301034	y	1	NA	1928	none	illit	none	none	TRUE	FALSE	y	y	n	3	y	n	n	n	n	n	n	NA	FALSE	FALSE	9	n	1949	TRUE	12
C	Jiangxi	2301	2301035	n	0	0	1941	none	illit	none	none	TRUE	TRUE	y	y	NA	4	y	y	n	n	n	n	y	0.08	FALSE	FALSE	7.5	n	1959	NA	10.5
C	Jiangxi	2301	2301036	y	1	NA	1925	none	illit	none	none	TRUE	TRUE	n	y	NA	2	y	y	n	n	n	n	y	0.5	FALSE	FALSE	15.5	n	1944	TRUE	3.5
C	Jiangxi	2301	2301037	y	1	NA	1939	none	half	none	none	TRUE	FALSE	y	y	NA	3	y	n	n	n	y	n	n	NA	FALSE	TRUE	NA	n	1956	TRUE	NA
C	Jiangxi	2301	2301038	n	0	0	1933	none	illit	none	none	FALSE	FALSE	n	y	n	1	n	n	n	n	n	n	n	NA	FALSE	FALSE	NA	n	1952	NA	NA
C	Jiangxi	2301	2301039	n	0	0	1936	none	illit	none	some	TRUE	FALSE	y	y	NA	4	y	n	n	n	n	n	y	NA	FALSE	FALSE	12.5	n	1954	NA	5.5
C	Jiangxi	2301	2301040	n	0	0	1931	none	illit	NA	NA	TRUE	FALSE	y	y	y	4	y	n	n	n	n	n	n	NA	FALSE	FALSE	NA	n	1954	NA	NA
C	Jiangxi	2301	2301042	n	0	0	1935	none	illit	none	NA	FALSE	FALSE	y	y	NA	4	n	n	n	n	n	n	y	NA	FALSE	FALSE	NA	y	1953	NA	NA
C	Jiangxi	2301	2301043	n	0	0	1940	none	illit	none	none	TRUE	FALSE	y	y	y	3	y	n	n	n	y	n	n	NA	FALSE	TRUE	NA	n	1963	NA	NA
C	Jiangxi	2301	2301045	n	0	0	1938	none	illit	none	none	FALSE	FALSE	y	y	y	3	n	n	n	n	n	n	y	NA	FALSE	FALSE	NA	n	1958	NA	NA
C	Jiangxi	2301	2301046	n	0	0	1933	none	illit	none	none	TRUE	FALSE	n	y	y	3	y	n	n	n	n	n	n	NA	FALSE	FALSE	NA	n	1954	NA	NA
C	Jiangxi	2301	2301048	n	0	0	1940	none	illit	none	none	TRUE	FALSE	y	y	NA	4	y	n	n	n	y	n	y	0.25	FALSE	TRUE	9	n	1959	NA	10
C	Jiangxi	2301	2301049	n	0	0	1942	none	illit	none	none	TRUE	FALSE	y	y	y	4	y	n	n	n	y	n	y	0.25	FALSE	TRUE	9	n	1960	NA	9
C	Jiangxi	2301	2301050	n	0	0	1928	none	illit	none	some	TRUE	FALSE	y	y	NA	3	y	n	n	n	n	n	n	NA	FALSE	FALSE	NA	n	1945	NA	NA
C	Jiangxi	2301	2301051	n	0	0	1938	none	illit	NA	NA	TRUE	TRUE	y	y	n	3	y	y	n	n	n	n	n	NA	FALSE	FALSE	3	n	1954	NA	13
C	Jiangxi	2301	2301052	n	0	0	1936	none	illit	none	none	TRUE	FALSE	NA	y	y	3	y	n	n	n	n	n	n	NA	FALSE	FALSE	NA	n	1953	NA	NA
C	Jiangxi	2301	2301053	n	0	0	1942	none	illit	none	some	FALSE	FALSE	y	y	NA	4	n	n	n	n	n	n	y	NA	FALSE	FALSE	NA	n	1961	NA	NA
C	Jiangxi	2301	2301054	y	1	NA	1925	none	illit	none	none	TRUE	TRUE	n	y	NA	4	y	y	n	n	n	n	y	NA	FALSE	FALSE	NA	n	1944	TRUE	NA
C	Jiangxi	2301	2301055	n	0	0	1940	none	illit	none	NA	TRUE	FALSE	n	y	y	4	y	n	n	n	n	n	n	NA	FALSE	FALSE	NA	n	1959	NA	NA
C	Jiangxi	2301	2301056	n	0	0	1935	none	illit	none	none	TRUE	FALSE	y	y	y	4	y	n	n	n	y	n	y	NA	FALSE	TRUE	12.5	n	1953	NA	5.5
C	Jiangxi	2301	2301057	n	0	0	1933	none	illit	none	none	FALSE	FALSE	n	n	NA	3	n	n	n	n	n	n	n	NA	FALSE	FALSE	NA	n	1948	NA	NA
C	Jiangxi	2301	2301058	n	0	0	1940	none	illit	none	none	TRUE	TRUE	y	y	n	4	y	y	n	n	y	n	y	0.16	FALSE	TRUE	8	n	1960	NA	12
C	Jiangxi	2301	2301059	n	0	0	1938	none	illit	none	none	FALSE	FALSE	y	y	n	1	n	n	n	n	n	n	y	NA	FALSE	FALSE	NA	n	1959	NA	NA
C	Jiangxi	2301	2301060	n	0	0	1939	none	illit	none	some	TRUE	FALSE	NA	y	n	4	y	n	n	n	y	n	y	0.5	FALSE	TRUE	11	n	1960	NA	10
C	Jiangxi	2301	2301061	n	0	0	1938	none	illit	none	none	NA	NA	y	y	n	3	NA	NA	NA	NA	y	n	y	NA	FALSE	TRUE	NA	n	1960	NA	NA
C	Jiangxi	2301	2301062	n	0	0	1932	none	illit	none	none	TRUE	TRUE	y	y	n	3	y	y	n	n	y	n	y	0.06	FALSE	TRUE	NA	n	1951	NA	NA
C	Jiangxi	2301	2301063	n	0	0	1939	none	illit	none	none	TRUE	FALSE	y	n	n	4	n	n	n	n	y	n	n	NA	FALSE	TRUE	NA	n	1962	NA	NA
C	Jiangxi	2301	2301064	y	1	NA	1931	none	illit	none	none	TRUE	FALSE	y	y	y	4	n	n	n	n	y	n	y	NA	FALSE	TRUE	NA	n	1953	NA	NA
C	Jiangxi	2301	2301065	n	0	0	1941	none	illit	none	none	TRUE	FALSE	y	y	n	1	n	n	n	n	y	n	n	NA	FALSE	TRUE	NA	n	1963	NA	NA
C	Jiangxi	2301	2301066	n	0	0	1934	none	illit	none	some	TRUE	FALSE	NA	y	n	3	n	n	n	n	y	n	y	NA	FALSE	TRUE	NA	n	1954	NA	NA
C	Jiangxi	2301	2301068	n	0	0	1928	none	illit	none	some	TRUE	TRUE	y	y	n	4	y	y	n	n	y	n	n	0.4	FALSE	TRUE	NA	n	1948	NA	NA
C	Jiangxi	2301	2301069	n	0	0	1934	none	illit	none	none	TRUE	FALSE	NA	y	y	2	n	n	n	n	y	n	y	NA	FALSE	TRUE	NA	n	1952	NA	NA
C	Jiangxi	2301	2301070	n	0	0	1933	none	illit	none	some	TRUE	TRUE	NA	y	y	1	y	y	n	n	y	n	y	1	FALSE	TRUE	15	n	1953	NA	5
C	Jiangxi	2301	2301071	y	1	NA	1928	none	illit	some	some	TRUE	FALSE	y	y	y	4	y	n	n	n	y	n	y	NA	FALSE	TRUE	15.5	n	1956	TRUE	12.5
C	Jiangxi	2301	2301072	n	0	0	1930	none	illit	none	some	TRUE	NA	y	y	NA	2	n	n	n	n	y	NA	n	0.33	FALSE	TRUE	NA	n	1955	NA	NA
C	Jiangxi	2301	2301073	n	0	0	1935	none	illit	none	some	TRUE	FALSE	y	NA	n	4	n	n	n	n	y	n	n	NA	FALSE	TRUE	NA	n	1953	NA	NA
C	Jiangxi	2301	2301074	n	0	0	1936	none	illit	none	none	FALSE	FALSE	NA	y	n	1	n	n	n	n	n	n	n	NA	FALSE	FALSE	NA	n	1955	NA	NA
C	Jiangxi	2301	2301075	n	0	0	1929	none	illit	none	some	TRUE	FALSE	y	y	n	2	n	n	n	n	y	n	n	0.33	FALSE	TRUE	NA	n	1951	NA	NA
C	Jiangxi	2301	2301076	y	1	NA	1929	none	illit	none	none	TRUE	TRUE	n	y	y	1	n	y	n	n	y	n	y	0.33	FALSE	TRUE	NA	n	1951	TRUE	NA
C	Jiangxi	2301	2301077	n	0	0	1929	none	illit	none	none	TRUE	FALSE	y	y	y	3	n	n	n	n	y	n	n	NA	FALSE	TRUE	NA	n	1946	NA	NA
C	Jiangxi	2301	2301078	n	0	0	1941	none	illit	none	none	TRUE	FALSE	y	y	n	1	n	n	n	n	y	n	y	NA	FALSE	TRUE	NA	n	1959	NA	NA
C	Jiangxi	2301	2301080	n	0	0	1933	none	illit	none	none	TRUE	TRUE	y	y	y	3	n	y	n	n	y	n	y	0.13	FALSE	TRUE	13	n	1952	NA	6
C	Jiangxi	2301	2301081	y	1	NA	1929	none	illit	none	some	TRUE	NA	y	y	n	1	y	n	n	n	y	NA	n	NA	FALSE	TRUE	NA	n	1948	TRUE	NA
C	Jiangxi	2301	2301082	n	0	0	1940	none	half	none	none	FALSE	TRUE	y	y	y	4	n	y	n	n	n	y	NA	NA	TRUE	FALSE	NA	n	1959	NA	NA
C	Jiangxi	2301	2301083	y	1	NA	1935	some	half	none	none	TRUE	TRUE	y	y	n	3	n	y	n	n	y	y	y	NA	TRUE	TRUE	8.5	n	1955	TRUE	11.5
C	Jiangxi	2301	2301084	n	0	0	1934	none	illit	none	none	FALSE	FALSE	n	NA	n	NA	n	n	n	n	n	n	n	NA	FALSE	FALSE	NA	n	1952	NA	NA
C	Jiangxi	2301	2301086	y	1	1	1936	none	NA	none	none	NA	NA	NA	y	n	3	n	n	n	n	NA	NA	n	NA	FALSE	FALSE	NA	n	1954	TRUE	NA
C	Jiangxi	2301	2301087	n	0	0	1933	none	half	none	some	TRUE	FALSE	y	y	n	4	y	n	n	n	y	n	n	1.5	FALSE	TRUE	NA	n	1954	NA	NA
C	Jiangxi	2301	2301088	n	0	0	1938	none	half	none	none	TRUE	TRUE	y	n	y	4	n	y	n	n	y	n	y	0.25	FALSE	TRUE	NA	n	1961	NA	NA
C	Jiangxi	2301	2301089	n	0	0	1933	none	illit	NA	NA	NA	NA	NA	y	y	3	NA	NA	n	n	NA	NA	n	NA	FALSE	FALSE	8	n	1950	NA	9
C	Jiangxi	2301	2301090	n	0	0	1929	none	illit	none	none	FALSE	TRUE	NA	y	y	1	n	y	n	n	n	n	y	NA	FALSE	FALSE	8.5	n	1952	NA	14.5
C	Jiangxi	2301	2301091	n	0	0	1940	none	illit	none	none	TRUE	TRUE	y	y	y	4	n	y	n	n	y	n	y	0.56	FALSE	TRUE	12	n	1961	NA	9
C	Jiangxi	2301	2301092	y	1	NA	1936	none	illit	none	none	FALSE	FALSE	NA	y	n	NA	n	n	n	n	n	n	y	NA	FALSE	FALSE	NA	n	1958	NA	NA
C	Jiangxi	2301	2301093	n	0	0	1935	none	illit	none	none	TRUE	FALSE	n	y	n	3	y	n	n	n	y	n	n	NA	FALSE	TRUE	NA	n	1953	NA	NA
C	Jiangxi	2301	2301094	n	0	0	1931	none	illit	none	none	TRUE	FALSE	y	y	n	4	y	n	n	n	y	n	y	NA	FALSE	TRUE	NA	n	1951	NA	NA
C	Jiangxi	2301	2301095	n	0	0	1933	none	illit	none	none	TRUE	FALSE	y	y	n	3	y	n	n	n	y	n	n	NA	FALSE	TRUE	NA	n	1953	NA	NA
C	Jiangxi	2301	2301096	n	0	0	1937	none	illit	none	none	TRUE	FALSE	y	y	n	3	n	n	n	n	y	n	n	NA	FALSE	TRUE	NA	n	1956	NA	NA
C	Jiangxi	2301	2301097	n	0	0	1939	none	illit	some	some	FALSE	FALSE	y	y	n	3	n	n	n	n	n	n	n	NA	FALSE	FALSE	NA	n	1955	NA	NA
C	Jiangxi	2301	2301098	n	0	0	1935	none	illit	none	none	NA	NA	NA	NA	n	4	y	n	NA	y	NA	NA	n	0.5	TRUE	FALSE	NA	y	1957	NA	NA
C	Jiangxi	2301	2301099	y	1	NA	1935	some	half	some	none	TRUE	TRUE	y	y	n	4	y	y	n	y	y	n	n	0.33	TRUE	TRUE	7	y	1953	TRUE	11
C	Jiangxi	2301	2301100	y	1	NA	1927	some	illit	none	NA	TRUE	TRUE	n	y	n	4	y	n	n	n	y	y	y	NA	TRUE	TRUE	NA	NA	1948	TRUE	NA
C	Jiangxi	2301	2301101	n	0	0	1941	some	lit	none	none	TRUE	TRUE	y	y	y	4	y	y	n	n	y	y	y	0.5	TRUE	TRUE	NA	n	1963	NA	NA
C	Jiangxi	2301	2301102	y	1	1	1932	none	lit	none	some	NA	NA	y	y	y	3	NA	NA	n	n	y	y	y	NA	TRUE	TRUE	NA	n	1949	TRUE	NA
C	Jiangxi	2301	2301103	n	0	0	1936	none	illit	none	none	TRUE	TRUE	y	n	y	3	y	y	n	n	y	y	n	NA	TRUE	TRUE	NA	n	1957	NA	NA
C	Jiangxi	2301	2301104	n	0	0	1934	none	illit	none	none	TRUE	FALSE	y	n	n	2	y	n	n	n	y	n	n	0.06	FALSE	TRUE	11	n	1949	NA	4
C	Jiangxi	2301	2301105	n	0	0	1931	none	illit	none	none	TRUE	NA	y	y	y	4	y	NA	y	y	y	n	y	1.5	TRUE	TRUE	12.5	y	1953	NA	9.5
C	Jiangxi	2301	2301108	n	0	0	1940	none	illit	none	none	NA	NA	y	y	y	2	y	n	n	n	NA	NA	NA	NA	FALSE	FALSE	NA	n	1959	NA	NA
C	Jiangxi	2301	2301109	n	0	0	1931	none	illit	none	none	TRUE	TRUE	y	y	n	NA	n	y	n	n	y	y	y	1	TRUE	TRUE	NA	n	1952	NA	NA
C	Jiangxi	2301	2301110	n	0	0	1938	none	illit	none	none	TRUE	NA	y	y	y	3	y	n	n	n	y	NA	NA	NA	FALSE	TRUE	NA	y	1958	NA	NA
C	Jiangxi	2301	2301111	n	0	0	1934	none	illit	none	none	TRUE	TRUE	y	y	n	4	y	y	n	n	y	n	y	NA	FALSE	TRUE	20	y	1954	NA	0
C	Jiangxi	2301	2301112	y	1	1	1928	none	illit	none	none	TRUE	FALSE	y	y	n	3	y	n	n	n	y	n	y	0.22	FALSE	TRUE	16	y	1948	TRUE	4
C	Jiangxi	2301	2301113	n	0	0	1933	none	illit	none	none	TRUE	FALSE	y	y	n	1	y	n	n	n	y	n	y	NA	FALSE	TRUE	NA	n	1953	NA	NA
C	Jiangxi	2301	2301114	n	0	0	1939	none	illit	none	none	TRUE	FALSE	y	n	n	1	y	n	n	n	y	n	y	NA	FALSE	TRUE	NA	n	1959	NA	NA
C	Jiangxi	2301	2301115	n	0	0	1932	none	illit	none	none	FALSE	TRUE	n	y	n	4	n	y	n	n	n	n	n	1	FALSE	FALSE	13	y	1950	NA	5
C	Jiangxi	2301	2301116	n	0	0	1932	none	illit	none	none	TRUE	FALSE	y	y	n	4	y	n	n	n	y	n	n	0.25	FALSE	TRUE	8	n	1950	NA	10
C	Jiangxi	2301	2301117	y	1	1	1940	none	illit	none	none	TRUE	NA	y	y	y	2	n	y	n	n	y	NA	y	NA	FALSE	TRUE	8	n	1961	TRUE	13
C	Jiangxi	2301	2301118	n	0	0	1932	none	illit	none	none	TRUE	FALSE	y	NA	y	4	y	n	n	n	n	n	y	NA	FALSE	FALSE	NA	n	1947	NA	NA
C	Jiangxi	2301	2301119	n	0	0	1941	none	half	none	none	FALSE	FALSE	y	y	y	1	n	n	n	n	n	n	n	NA	FALSE	FALSE	NA	n	1959	NA	NA
C	Jiangxi	2301	2301121	n	0	0	1941	none	illit	none	some	TRUE	FALSE	y	y	y	4	y	n	n	n	y	n	y	NA	FALSE	TRUE	NA	n	1962	NA	NA
C	Jiangxi	2301	2301122	n	0	0	1939	none	illit	none	some	TRUE	FALSE	y	y	y	4	n	n	n	n	y	n	n	NA	FALSE	TRUE	NA	y	1957	NA	NA
C	Jiangxi	2301	2301123	y	1	1	1923	none	illit	none	none	TRUE	FALSE	y	y	n	2	y	n	n	n	y	n	y	0.47	FALSE	TRUE	5.5	n	1937	TRUE	8.5
C	Jiangxi	2301	2301124	n	0	0	1940	some	lit	none	none	FALSE	FALSE	n	y	n	1	n	n	n	n	n	n	n	NA	FALSE	FALSE	NA	n	1957	NA	NA
C	Jiangxi	2301	2301125	y	1	NA	1939	none	illit	none	none	TRUE	FALSE	y	y	n	4	n	n	n	n	y	n	y	NA	FALSE	TRUE	NA	n	1955	TRUE	NA
C	Jiangxi	2301	2301126	y	1	1	1928	none	illit	none	none	TRUE	FALSE	y	y	n	2	n	n	n	n	y	n	y	NA	FALSE	TRUE	NA	n	1949	TRUE	NA
C	Jiangxi	2301	2301127	n	0	0	1940	none	illit	none	none	FALSE	FALSE	n	y	n	NA	n	n	n	n	n	n	n	NA	FALSE	FALSE	NA	n	1955	NA	NA
C	Jiangxi	2301	2301128	y	1	1	1935	none	illit	none	none	TRUE	FALSE	y	y	n	4	y	n	n	n	n	n	y	0.13	FALSE	FALSE	7	n	1947	TRUE	5
C	Jiangxi	2301	2301129	n	0	0	1942	none	illit	none	none	FALSE	FALSE	n	y	n	3	n	n	n	n	n	n	n	NA	FALSE	FALSE	NA	n	1960	NA	NA
C	Jiangxi	2301	2301130	n	0	0	1934	none	illit	none	none	TRUE	TRUE	y	y	n	1	y	y	n	n	y	n	y	0.19	FALSE	TRUE	7	n	1954	NA	13
C	Jiangxi	2301	2301131	n	0	0	1934	none	illit	none	none	TRUE	TRUE	y	y	n	1	y	y	n	n	y	n	y	0.16	FALSE	TRUE	7.5	y	1953	NA	11.5
C	Jiangxi	2301	2301132	n	0	0	1940	none	illit	none	none	TRUE	TRUE	y	NA	n	4	y	y	n	n	n	n	n	0.13	FALSE	FALSE	15.5	n	1956	NA	0.5
C	Jiangxi	2301	2301133	n	0	0	1939	none	illit	none	none	TRUE	FALSE	y	y	y	3	n	n	n	n	y	n	n	NA	FALSE	TRUE	NA	n	1956	NA	NA
C	Jiangxi	2301	2301134	n	0	0	1940	none	illit	none	none	TRUE	TRUE	y	y	n	4	y	y	y	y	n	n	y	0.25	TRUE	TRUE	7.5	y	1957	NA	9.5
C	Jiangxi	2301	2301135	n	0	0	1934	none	illit	none	none	FALSE	FALSE	n	y	y	4	n	n	n	n	n	n	n	NA	FALSE	FALSE	10	n	1948	NA	4
C	Jiangxi	2301	2301136	n	0	0	1928	none	half	none	none	TRUE	TRUE	y	n	n	2	y	y	n	n	y	n	y	1	FALSE	TRUE	7.5	n	1954	NA	18.5
C	Jiangxi	2301	2301137	n	0	0	1929	none	illit	none	none	TRUE	FALSE	y	y	NA	4	y	n	n	n	y	n	n	NA	FALSE	TRUE	NA	n	1944	NA	NA
C	Jiangxi	2301	2301138	n	0	0	1936	none	illit	none	none	TRUE	TRUE	y	y	y	3	y	y	n	n	y	n	y	0.06	FALSE	TRUE	12	n	NA	NA	NA
C	Jiangxi	2301	2301139	n	0	0	1930	none	illit	none	some	TRUE	TRUE	y	y	n	4	y	y	n	n	y	n	y	0.34	FALSE	TRUE	13.5	n	1950	NA	6.5
C	Jiangxi	2301	2301141	n	0	0	1938	none	illit	none	NA	TRUE	FALSE	y	y	y	3	y	n	n	n	y	n	y	NA	FALSE	TRUE	NA	n	1955	NA	NA
C	Jiangxi	2301	2301142	n	0	0	1940	none	half	none	none	FALSE	FALSE	y	y	y	4	n	n	n	n	n	n	n	NA	FALSE	FALSE	NA	n	1959	NA	NA
C	Jiangxi	2301	2301143	n	0	0	1937	none	illit	none	none	TRUE	FALSE	n	y	y	4	y	n	n	n	y	n	y	0.13	FALSE	TRUE	7.5	y	1954	NA	9.5
C	Jiangxi	2301	2301144	n	0	0	1941	some	half	none	none	TRUE	TRUE	y	y	y	4	y	y	n	n	n	n	y	NA	FALSE	FALSE	NA	n	1958	NA	NA
C	Jiangxi	2301	2301145	n	0	0	1937	some	illit	none	NA	TRUE	TRUE	n	y	NA	NA	y	y	n	n	y	n	n	NA	FALSE	TRUE	NA	n	1955	NA	NA
C	Jiangxi	2301	2301146	n	0	0	1923	none	half	none	NA	TRUE	FALSE	n	y	y	3	y	n	n	n	n	n	y	NA	FALSE	FALSE	NA	n	1942	NA	NA
C	Jiangxi	2301	2301147	n	0	0	1933	none	illit	none	none	NA	NA	NA	y	n	4	NA	NA	NA	NA	NA	NA	y	NA	FALSE	FALSE	8	n	1949	NA	8
C	Jiangxi	2301	2301148	NA	NA	NA	1941	none	half	none	NA	TRUE	FALSE	y	y	NA	4	y	n	n	n	y	n	y	NA	FALSE	TRUE	15	n	1961	NA	5
C	Jiangxi	2301	2301149	n	0	0	1937	none	illit	none	none	TRUE	TRUE	y	y	y	NA	y	y	n	n	y	n	y	0.1	FALSE	TRUE	15	n	1954	NA	2
C	Jiangxi	2301	2301150	y	1	NA	1923	none	illit	none	none	NA	TRUE	NA	y	n	4	NA	y	n	y	y	y	y	NA	TRUE	TRUE	7.5	y	1944	TRUE	13.5
C	Jiangxi	2301	2301151	y	1	NA	1937	none	illit	none	NA	TRUE	FALSE	y	y	n	4	y	n	n	n	y	n	n	NA	FALSE	TRUE	NA	n	1949	TRUE	NA
C	Jiangxi	2301	2301152	n	0	0	1942	none	illit	none	NA	TRUE	NA	y	y	y	1	y	y	n	n	y	NA	y	1	FALSE	TRUE	9	n	1965	NA	14
C	Jiangxi	2301	2301153	n	0	0	1940	none	illit	none	none	FALSE	FALSE	n	y	NA	4	n	n	n	n	n	n	y	NA	FALSE	FALSE	NA	n	1958	NA	NA
C	Jiangxi	2301	2301154	n	0	0	1931	none	illit	none	none	TRUE	FALSE	y	y	n	4	y	n	n	n	y	n	y	NA	FALSE	TRUE	NA	n	1948	NA	NA
C	Jiangxi	2301	2301155	n	0	0	1940	none	illit	none	none	NA	NA	NA	y	y	3	y	n	n	n	NA	NA	y	NA	FALSE	FALSE	NA	n	1958	NA	NA
C	Jiangxi	2301	2301156	n	0	0	1937	none	half	none	none	TRUE	NA	y	y	n	3	y	n	n	n	y	NA	n	NA	FALSE	TRUE	NA	n	1959	NA	NA
C	Jiangxi	2301	2301158	y	1	1	1932	none	illit	none	none	TRUE	FALSE	n	y	n	NA	y	n	n	n	y	n	y	0.16	FALSE	TRUE	10	y	1950	TRUE	8
C	Jiangxi	2301	2301159	y	1	NA	1933	none	half	none	none	TRUE	NA	y	y	y	NA	n	NA	n	n	y	y	y	0.13	TRUE	TRUE	NA	n	1948	TRUE	-0.5
C	Jiangxi	2301	2301160	NA	NA	NA	1934	none	illit	none	none	TRUE	FALSE	y	NA	NA	NA	y	n	n	n	y	n	n	NA	FALSE	TRUE	NA	n	1952	NA	NA
C	Jiangxi	2301	2301161	n	0	0	1934	none	half	none	none	NA	NA	n	y	n	NA	NA	NA	NA	NA	y	NA	n	NA	FALSE	TRUE	NA	NA	1955	NA	NA
C	Jiangxi	2301	2301162	n	0	0	1932	none	illit	none	none	NA	NA	n	y	n	NA	NA	NA	NA	NA	y	n	n	NA	FALSE	TRUE	NA	NA	1952	NA	NA
C	Jiangxi	2301	2301163	y	1	1	1929	none	illit	none	none	TRUE	FALSE	y	y	n	NA	y	n	n	n	y	n	y	NA	FALSE	TRUE	NA	NA	1946	TRUE	NA
C	Jiangxi	2301	2301164	n	0	0	1935	none	illit	none	none	TRUE	FALSE	y	y	n	3	y	n	n	n	y	n	y	NA	FALSE	TRUE	NA	n	1953	NA	NA
C	Jiangxi	2301	2301165	n	0	0	1937	none	half	none	none	TRUE	FALSE	y	y	n	3	n	n	n	n	y	n	y	NA	FALSE	TRUE	NA	n	1955	NA	NA
C	Jiangxi	2301	2301166	n	0	0	1938	none	illit	none	none	TRUE	TRUE	y	NA	NA	3	n	y	n	n	y	n	y	NA	FALSE	TRUE	7	n	1963	NA	18
C	Jiangxi	2301	2301167	n	0	0	1939	none	half	none	none	FALSE	FALSE	y	y	y	NA	n	n	n	n	n	n	n	NA	FALSE	FALSE	NA	n	1960	NA	NA
C	Jiangxi	2301	2301168	n	0	0	1941	none	illit	none	none	TRUE	TRUE	y	y	n	1	y	y	n	n	y	n	y	0.04	FALSE	TRUE	NA	n	1960	NA	NA
C	Jiangxi	2301	2301169	n	0	0	1938	none	illit	none	none	TRUE	TRUE	y	y	y	4	y	y	n	n	n	n	y	1.5	FALSE	FALSE	NA	n	1958	NA	NA
C	Jiangxi	2301	2301170	n	0	0	1925	none	illit	NA	NA	NA	NA	NA	NA	n	NA	NA	NA	NA	NA	NA	NA	n	NA	FALSE	FALSE	NA	NA	NA	NA	NA
C	Jiangxi	2301	2301171	y	1	NA	1917	none	illit	NA	NA	TRUE	FALSE	y	NA	NA	NA	y	n	n	n	n	n	y	NA	FALSE	FALSE	NA	n	1936	TRUE	NA
C	Jiangxi	2301	2301172	n	0	0	1942	some	illit	none	none	TRUE	TRUE	y	y	n	1	y	y	n	y	y	n	y	NA	TRUE	TRUE	14	y	1960	NA	4
C	Jiangxi	2301	2301173	y	1	1	1928	none	illit	none	none	TRUE	TRUE	NA	y	y	1	y	y	n	n	y	n	y	NA	FALSE	TRUE	NA	n	1951	TRUE	NA
C	Jiangxi	2301	2301174	y	1	1	1926	none	illit	none	none	FALSE	TRUE	NA	y	n	1	n	y	n	n	n	n	y	0.06	FALSE	FALSE	NA	n	1947	TRUE	NA
C	Jiangxi	2301	2301175	y	1	1	1930	none	illit	none	none	FALSE	FALSE	NA	y	y	3	n	n	n	n	n	n	n	NA	FALSE	FALSE	NA	n	1942	TRUE	NA
C	Jiangxi	2301	2301176	y	1	1	1931	none	illit	none	none	FALSE	FALSE	y	y	n	3	n	n	n	n	n	n	y	NA	FALSE	FALSE	NA	n	1955	TRUE	NA
C	Jiangxi	2301	2301177	n	0	0	1940	none	illit	none	none	TRUE	TRUE	y	y	NA	4	y	y	n	n	y	n	y	0.41	FALSE	TRUE	12.5	n	1958	NA	5.5
C	Jiangxi	2301	2301178	n	0	0	1942	none	illit	none	none	TRUE	FALSE	y	y	y	2	y	n	n	n	y	n	n	NA	FALSE	TRUE	NA	n	1963	NA	NA
C	Jiangxi	2301	2301179	n	0	0	1937	none	illit	none	none	TRUE	FALSE	y	y	n	0	n	n	n	n	y	n	n	NA	FALSE	TRUE	NA	n	1958	NA	NA
C	Jiangxi	2301	2301180	n	0	0	1930	none	illit	none	none	FALSE	FALSE	y	n	n	3	n	n	n	n	n	n	n	NA	FALSE	FALSE	NA	n	1946	NA	NA
C	Jiangxi	2301	2301181	n	0	0	1935	none	illit	none	none	TRUE	FALSE	y	y	n	3	n	n	n	n	y	n	y	NA	FALSE	TRUE	NA	n	1956	NA	NA
C	Jiangxi	2301	2301182	n	0	0	1927	none	illit	none	some	TRUE	FALSE	y	y	y	1	n	n	n	n	y	n	y	NA	FALSE	TRUE	NA	n	1951	NA	NA
C	Jiangxi	2301	2301183	y	1	1	1935	none	illit	none	none	TRUE	TRUE	y	y	y	3	n	y	n	n	y	n	y	0.19	FALSE	TRUE	8.5	y	1954	TRUE	10.5
C	Jiangxi	2301	2301184	y	1	NA	1928	none	illit	none	none	TRUE	TRUE	NA	y	y	1	y	y	n	n	y	y	y	0.16	TRUE	TRUE	12	n	1945	TRUE	5
C	Jiangxi	2301	2301185	n	0	0	1936	none	half	none	none	TRUE	TRUE	n	y	n	1	y	y	n	n	y	n	n	0.41	FALSE	TRUE	NA	n	1960	NA	NA
C	Jiangxi	2301	2301186	y	1	NA	1922	none	illit	none	none	TRUE	TRUE	n	y	n	1	y	y	n	y	y	y	n	0.41	TRUE	TRUE	3.5	y	1943	NA	17.5
C	Jiangxi	2301	2301187	n	0	0	1930	none	illit	none	none	TRUE	FALSE	y	y	y	2	y	n	n	n	n	n	NA	NA	FALSE	FALSE	NA	n	1951	NA	NA
C	Jiangxi	2301	2301188	n	0	0	1936	some	lit	none	none	TRUE	FALSE	y	y	y	1	n	n	n	n	y	n	n	NA	FALSE	TRUE	NA	n	1955	NA	NA
C	Jiangxi	2301	2301189	n	0	0	1941	none	illit	none	some	TRUE	FALSE	y	y	y	3	y	n	n	n	n	n	y	NA	FALSE	FALSE	NA	n	1960	NA	NA
C	Jiangxi	2301	2301190	n	0	0	1934	none	illit	none	none	TRUE	FALSE	y	y	y	3	y	n	n	n	y	n	n	NA	FALSE	TRUE	10	n	1954	NA	10
C	Jiangxi	2301	2301191	n	0	0	1938	none	illit	none	none	TRUE	TRUE	y	y	n	3	y	y	n	n	n	n	y	0.13	FALSE	FALSE	8.5	n	1958	NA	11.5
C	Jiangxi	2301	2301192	n	0	0	1934	none	illit	none	none	TRUE	TRUE	y	y	n	2	y	y	n	n	y	n	y	0.19	FALSE	TRUE	8	y	1953	NA	11
C	Jiangxi	2301	2301194	y	1	NA	1921	none	illit	none	none	TRUE	FALSE	y	y	y	1	y	n	n	n	y	n	y	NA	FALSE	TRUE	NA	n	1937	TRUE	NA
C	Jiangxi	2301	2301195	n	0	0	1928	none	illit	none	none	TRUE	TRUE	NA	y	NA	1	y	y	n	n	n	n	y	0.19	FALSE	FALSE	12	n	1946	NA	6
C	Jiangxi	2301	2301196	n	0	0	1933	none	illit	none	none	TRUE	FALSE	y	y	y	3	y	n	n	n	y	n	n	NA	FALSE	TRUE	NA	n	1955	NA	NA
C	Jiangxi	2302	2302001	n	0	0	1935	none	illit	none	none	NA	NA	y	NA	y	3	n	n	NA	NA	n	n	n	NA	FALSE	FALSE	NA	n	1952	NA	NA
C	Jiangxi	2302	2302002	n	0	0	1935	none	half	none	none	NA	NA	n	y	NA	NA	n	y	NA	NA	n	n	NA	0.25	FALSE	FALSE	NA	n	1954	NA	NA
C	Jiangxi	2302	2302003	n	0	0	1934	none	illit	NA	NA	NA	NA	y	y	NA	4	n	n	NA	NA	NA	NA	n	NA	FALSE	FALSE	NA	n	1959.5	NA	NA
C	Jiangxi	2302	2302004	n	0	0	1933	none	illit	none	none	NA	NA	y	y	NA	4	n	n	NA	NA	n	y	n	NA	TRUE	FALSE	NA	n	1949	NA	NA
C	Jiangxi	2302	2302005	n	0	0	1937	none	half	none	none	NA	NA	y	y	NA	NA	n	n	NA	NA	NA	NA	n	NA	FALSE	FALSE	NA	n	1954	NA	NA
C	Jiangxi	2302	2302006	y	1	1	1924	none	illit	none	none	NA	NA	y	y	n	2	y	n	NA	NA	y	y	n	0.5	TRUE	TRUE	NA	n	1938.5	FALSE	NA
C	Jiangxi	2302	2302007	n	0	0	1941	none	illit	none	none	NA	NA	y	y	y	3	n	n	NA	NA	NA	NA	y	NA	FALSE	FALSE	NA	y	1963	NA	NA
C	Jiangxi	2302	2302008	n	0	0	1933	none	illit	none	none	NA	NA	y	y	NA	4	n	n	NA	NA	y	n	n	NA	FALSE	TRUE	NA	n	1950	NA	NA
C	Jiangxi	2302	2302009	n	0	0	1932	some	half	none	NA	NA	NA	y	y	NA	4	n	n	NA	NA	y	y	n	NA	TRUE	TRUE	NA	n	1953	NA	NA
C	Jiangxi	2302	2302010	n	0	0	1935	none	half	none	none	NA	NA	y	y	NA	4	NA	NA	NA	NA	n	n	y	NA	FALSE	FALSE	NA	y	1952	NA	NA
C	Jiangxi	2302	2302011	n	0	0	1933	none	half	none	none	NA	NA	NA	y	NA	4	n	n	NA	NA	n	n	n	NA	FALSE	FALSE	NA	n	1955	NA	NA
C	Jiangxi	2302	2302012	n	0	0	1936	NA	half	none	NA	NA	NA	n	y	y	3	n	n	NA	NA	n	n	n	NA	FALSE	FALSE	NA	n	1956	NA	NA
C	Jiangxi	2302	2302013	n	0	0	1940	some	illit	none	some	NA	NA	NA	y	y	4	n	n	NA	NA	y	n	n	NA	FALSE	TRUE	NA	n	1960	NA	NA
C	Jiangxi	2302	2302014	n	0	0	1937	none	illit	none	NA	NA	NA	y	y	y	4	y	n	NA	NA	y	NA	y	0.1	FALSE	TRUE	NA	y	1955	NA	NA
C	Jiangxi	2302	2302015	n	0	0	1938	none	illit	none	none	NA	NA	y	y	y	4	n	n	NA	NA	y	y	n	NA	TRUE	TRUE	NA	n	1957	NA	NA
C	Jiangxi	2302	2302016	n	0	0	1932	none	illit	none	none	NA	NA	y	y	NA	4	NA	NA	NA	NA	y	NA	y	NA	FALSE	TRUE	NA	n	1950	NA	NA
C	Jiangxi	2302	2302017	n	0	0	1931	none	illit	NA	NA	NA	NA	y	NA	NA	4	n	n	NA	NA	y	n	n	NA	FALSE	TRUE	NA	n	1950	NA	NA
C	Jiangxi	2302	2302018	NA	NA	NA	1937	some	half	none	none	NA	NA	y	NA	NA	4	NA	NA	NA	NA	y	NA	y	NA	FALSE	TRUE	NA	n	1958	NA	NA
C	Jiangxi	2302	2302019	n	0	0	1939	none	illit	none	NA	NA	NA	y	y	NA	4	n	n	NA	NA	n	NA	n	NA	FALSE	FALSE	NA	n	1958	NA	NA
C	Jiangxi	2302	2302020	y	1	NA	1923	none	illit	none	none	NA	NA	y	y	NA	1	n	n	NA	NA	y	n	n	NA	FALSE	TRUE	NA	n	1947	TRUE	NA
C	Jiangxi	2302	2302021	n	0	0	1932	none	illit	none	none	NA	NA	y	y	n	3	y	n	NA	NA	y	n	y	NA	FALSE	TRUE	NA	n	1951	NA	NA
C	Jiangxi	2302	2302022	y	1	NA	1925	none	illit	none	none	NA	NA	y	y	n	4	n	n	NA	NA	n	n	y	NA	FALSE	FALSE	NA	n	1946	TRUE	NA
C	Jiangxi	2302	2302023	n	0	0	1934	none	half	none	none	NA	NA	y	y	n	4	y	n	NA	NA	y	NA	y	0.16	FALSE	TRUE	NA	n	NA	NA	NA
C	Jiangxi	2302	2302024	NA	NA	NA	1929	none	illit	none	none	NA	NA	y	y	n	4	n	n	NA	NA	y	n	n	NA	FALSE	TRUE	NA	n	1949	NA	NA
C	Jiangxi	2302	2302025	n	0	0	1933	none	illit	none	none	NA	NA	y	y	NA	4	y	n	NA	NA	y	n	y	0.16	FALSE	TRUE	NA	n	1952	NA	NA
C	Jiangxi	2302	2302026	n	0	0	1934	none	half	none	none	NA	NA	n	y	n	4	y	n	NA	NA	n	n	y	0.06	FALSE	FALSE	NA	n	1949	NA	NA
C	Jiangxi	2302	2302027	n	0	0	1939	some	half	none	none	NA	NA	y	y	n	4	n	n	NA	NA	y	n	n	NA	FALSE	TRUE	NA	n	1956	NA	NA
C	Jiangxi	2302	2302028	n	0	0	1936	none	half	none	none	NA	NA	y	y	n	4	NA	NA	NA	NA	y	n	n	0.1	FALSE	TRUE	NA	y	1955	NA	NA
C	Jiangxi	2302	2302029	y	1	NA	1924	none	illit	none	none	NA	NA	n	y	y	4	n	n	NA	NA	n	y	n	NA	TRUE	FALSE	NA	n	1942	TRUE	NA
C	Jiangxi	2302	2302030	y	1	NA	1922	none	illit	none	none	NA	NA	y	y	NA	4	n	n	NA	NA	y	y	y	NA	TRUE	TRUE	NA	NA	1937	TRUE	NA
C	Jiangxi	2302	2302031	n	0	0	1926	some	lit	none	NA	NA	NA	y	y	NA	NA	n	n	NA	NA	y	NA	n	NA	FALSE	TRUE	NA	n	1946	NA	NA
C	Jiangxi	2302	2302032	n	0	0	1938	none	half	none	none	NA	NA	y	y	n	4	n	y	NA	NA	n	n	y	1	FALSE	FALSE	NA	n	1956	NA	NA
C	Jiangxi	2302	2302033	n	0	0	1935	none	half	none	none	NA	NA	y	y	y	3	y	n	NA	NA	y	n	n	0.41	FALSE	TRUE	NA	n	1953	NA	NA
C	Jiangxi	2302	2302034	y	1	NA	1923	none	illit	none	none	NA	TRUE	y	y	y	0	n	y	NA	y	y	y	y	1.03	TRUE	TRUE	NA	y	1947	TRUE	NA
C	Jiangxi	2302	2302035	n	0	0	1940	some	half	none	none	NA	NA	n	y	NA	NA	n	n	NA	NA	y	NA	n	NA	FALSE	TRUE	NA	n	1958	NA	NA
C	Jiangxi	2302	2302036	n	0	0	1933	none	half	none	some	NA	NA	n	y	n	NA	NA	NA	NA	NA	y	n	y	0.16	FALSE	TRUE	NA	n	1951	NA	NA
C	Jiangxi	2302	2302037	n	0	0	1938	none	half	none	some	NA	NA	y	y	y	3	n	n	NA	NA	y	n	y	NA	FALSE	TRUE	NA	n	1958	NA	NA
C	Jiangxi	2302	2302038	n	0	0	1937	none	illit	none	none	NA	NA	n	y	n	1	NA	NA	NA	NA	y	n	y	0.09	FALSE	TRUE	NA	n	1955	NA	NA
C	Jiangxi	2302	2302039	n	0	0	1933	some	lit	none	none	NA	NA	y	y	y	3	n	n	NA	NA	y	n	n	NA	FALSE	TRUE	NA	n	1951	NA	NA
C	Jiangxi	2302	2302040	n	0	0	1934	none	illit	none	none	NA	NA	y	y	n	3	n	y	NA	NA	y	n	y	NA	FALSE	TRUE	NA	n	1950	NA	NA
C	Jiangxi	2302	2302041	n	0	0	1932	none	half	none	NA	NA	NA	y	y	n	NA	n	y	NA	NA	n	n	y	0.5	FALSE	FALSE	NA	n	1948	NA	NA
C	Jiangxi	2302	2302042	n	0	0	1925	none	illit	none	some	TRUE	TRUE	y	y	NA	4	n	y	n	n	y	y	NA	0.25	TRUE	TRUE	7.5	n	1947	NA	14.5
C	Jiangxi	2302	2302043	n	0	0	1935	none	illit	none	some	TRUE	TRUE	y	y	y	3	y	y	n	n	y	y	y	0.13	TRUE	TRUE	10.5	n	1950	NA	4.5
C	Jiangxi	2302	2302044	n	0	0	1929	none	illit	none	none	TRUE	TRUE	y	y	n	4	n	y	n	n	y	y	y	NA	TRUE	TRUE	14.5	n	1948	NA	4.5
C	Jiangxi	2302	2302045	n	0	0	1935	none	illit	none	none	FALSE	FALSE	y	y	NA	2	n	n	n	n	n	n	n	NA	FALSE	FALSE	NA	n	1953	NA	NA
C	Jiangxi	2302	2302046	n	0	0	1932	none	illit	none	none	TRUE	FALSE	y	y	NA	4	n	n	n	n	y	n	n	NA	FALSE	TRUE	20.5	n	1948	NA	-4.5
C	Jiangxi	2302	2302047	n	0	0	1938	none	illit	none	none	FALSE	TRUE	y	NA	NA	2	n	n	n	n	n	y	y	NA	TRUE	FALSE	NA	n	1956	NA	NA
C	Jiangxi	2302	2302048	n	0	0	1932	none	illit	none	none	TRUE	TRUE	y	y	NA	4	n	y	n	n	y	y	y	0.5	TRUE	TRUE	3	y	1954	NA	19
C	Jiangxi	2302	2302049	n	0	0	1937	none	half	none	none	TRUE	TRUE	y	y	NA	4	n	n	n	n	y	y	n	NA	TRUE	TRUE	30.5	n	1956	NA	-11.5
C	Jiangxi	2302	2302050	y	1	NA	1927	none	illit	none	none	FALSE	FALSE	n	y	y	1	n	n	n	n	n	n	n	NA	FALSE	FALSE	NA	n	1947	TRUE	NA
C	Jiangxi	2302	2302051	n	0	0	1932	none	illit	none	none	TRUE	TRUE	y	y	y	4	n	n	n	n	y	y	n	NA	TRUE	TRUE	NA	n	1952	NA	NA
C	Jiangxi	2302	2302052	n	0	0	1933	none	illit	none	none	FALSE	FALSE	n	y	y	4	n	n	n	n	n	n	n	NA	FALSE	FALSE	NA	n	1950	NA	NA
C	Jiangxi	2302	2302053	y	1	1	1922	none	illit	none	none	FALSE	TRUE	y	y	NA	2	n	y	n	n	n	y	y	0.13	TRUE	FALSE	NA	n	1941	TRUE	NA
C	Jiangxi	2302	2302054	n	0	0	1932	none	illit	NA	some	TRUE	FALSE	y	y	y	4	n	n	n	n	y	n	n	NA	FALSE	TRUE	NA	n	1950	NA	NA
C	Jiangxi	2302	2302055	n	0	0	1933	none	illit	none	none	TRUE	FALSE	y	y	n	4	n	n	n	n	y	n	n	NA	FALSE	TRUE	NA	n	1955	NA	NA
C	Jiangxi	2302	2302056	n	0	0	1935	none	illit	none	none	FALSE	FALSE	y	n	n	2	n	n	n	n	n	n	n	NA	FALSE	FALSE	NA	n	1955	NA	NA
C	Jiangxi	2302	2302057	n	0	0	1937	none	illit	some	none	FALSE	FALSE	n	y	n	4	n	n	n	n	n	n	n	NA	FALSE	FALSE	NA	n	1954	NA	NA
C	Jiangxi	2302	2302058	n	0	0	1933	none	illit	none	none	TRUE	FALSE	NA	y	NA	4	n	n	n	n	y	n	n	NA	FALSE	TRUE	NA	n	1949	NA	NA
C	Jiangxi	2302	2302059	y	1	NA	1917	none	illit	none	none	TRUE	FALSE	y	y	y	3	n	n	n	n	y	n	n	NA	FALSE	TRUE	NA	n	1938	TRUE	NA
C	Jiangxi	2302	2302060	n	0	0	1933	none	illit	none	none	TRUE	FALSE	y	y	n	4	n	n	n	n	y	n	n	NA	FALSE	TRUE	NA	n	1950	NA	NA
C	Jiangxi	2302	2302061	n	0	0	1937	none	illit	none	none	TRUE	FALSE	y	y	n	4	n	n	n	n	y	n	n	NA	FALSE	TRUE	NA	n	1955	NA	NA
C	Jiangxi	2302	2302062	n	0	0	1935	none	illit	none	none	TRUE	FALSE	y	y	y	4	n	n	n	n	y	n	n	NA	FALSE	TRUE	NA	n	1953	NA	NA
C	Jiangxi	2302	2302063	n	0	0	1940	none	illit	none	none	FALSE	FALSE	y	NA	NA	4	n	n	n	n	n	n	n	NA	FALSE	FALSE	NA	n	1961	NA	NA
C	Jiangxi	2302	2302064	n	0	0	1936	none	illit	none	none	TRUE	TRUE	y	y	n	4	n	y	n	n	y	y	y	0.25	TRUE	TRUE	8	n	1954	NA	10
C	Jiangxi	2302	2302065	n	0	0	1928	none	illit	none	none	FALSE	FALSE	y	y	n	2	n	n	n	n	n	n	n	NA	FALSE	FALSE	NA	n	1947	NA	NA
C	Jiangxi	2302	2302066	n	0	0	1930	none	illit	none	none	TRUE	TRUE	y	y	n	4	n	y	n	n	y	y	y	0.5	TRUE	TRUE	10.5	n	1946	NA	5.5
C	Jiangxi	2302	2302067	n	0	0	1923	none	illit	none	some	FALSE	TRUE	n	y	y	2	n	n	n	n	n	y	n	NA	TRUE	FALSE	NA	n	1940	NA	NA
C	Jiangxi	2302	2302068	n	0	0	1934	none	illit	none	some	TRUE	TRUE	y	y	y	2	n	y	n	n	y	y	y	NA	TRUE	TRUE	7.5	n	1948	NA	6.5
C	Jiangxi	2302	2302069	n	0	0	1932	none	illit	none	none	TRUE	TRUE	y	n	n	4	n	y	n	n	y	n	y	0.5	FALSE	TRUE	10.5	n	1948	NA	5.5
C	Jiangxi	2302	2302070	n	0	0	1932	none	illit	none	none	TRUE	NA	y	y	y	3	n	y	n	n	y	NA	y	0.22	FALSE	TRUE	10.5	n	1950	NA	7.5
C	Jiangxi	2302	2302071	n	0	0	1939	none	illit	none	some	TRUE	TRUE	y	y	y	1	n	y	n	n	y	n	y	0.31	FALSE	TRUE	10.5	n	1963	NA	13.5
C	Jiangxi	2302	2302072	y	1	1	1925	some	half	NA	NA	TRUE	FALSE	n	y	n	3	y	n	n	n	y	n	y	0.25	FALSE	TRUE	10.5	n	1947	TRUE	11.5
C	Jiangxi	2302	2302073	n	0	0	1937	some	illit	none	none	TRUE	FALSE	y	y	n	3	y	n	n	n	n	n	n	0.13	FALSE	FALSE	10.5	n	1960	NA	12.5
C	Jiangxi	2302	2302074	n	0	0	1934	some	illit	none	NA	NA	NA	y	y	y	4	n	y	n	n	NA	NA	y	0.34	FALSE	FALSE	8.5	n	1949	NA	6.5
C	Jiangxi	2302	2302075	n	0	0	1931	some	half	NA	none	NA	NA	n	y	y	4	n	n	n	n	NA	NA	n	NA	FALSE	FALSE	NA	n	1947	NA	NA
C	Jiangxi	2302	2302076	n	0	0	1941	none	illit	none	some	TRUE	FALSE	y	NA	n	0	n	n	n	n	y	n	y	NA	FALSE	TRUE	NA	n	1961	NA	NA
C	Jiangxi	2302	2302077	n	0	0	1939	none	illit	none	some	NA	NA	n	y	n	1	NA	NA	n	n	y	NA	y	0.19	FALSE	TRUE	11	n	1958	NA	8
C	Jiangxi	2302	2302078	n	0	0	1925	none	illit	none	none	FALSE	TRUE	y	y	y	4	n	n	n	n	n	y	n	NA	TRUE	FALSE	NA	n	1947	NA	NA
C	Jiangxi	2302	2302079	n	0	0	1929	none	half	none	NA	TRUE	NA	y	y	y	3	n	n	n	n	y	NA	n	NA	FALSE	TRUE	NA	n	1947	NA	NA
C	Jiangxi	2302	2302080	n	0	0	1934	some	half	none	some	TRUE	FALSE	y	y	y	4	y	n	n	n	y	n	n	0.16	FALSE	TRUE	NA	n	1952	NA	NA
C	Jiangxi	2302	2302081	y	1	NA	1933	none	half	none	some	TRUE	FALSE	y	y	n	4	y	n	n	n	y	n	y	0.16	FALSE	TRUE	10	n	1949	TRUE	6
C	Jiangxi	2302	2302082	y	1	1	1919	none	illit	none	NA	TRUE	TRUE	y	y	n	2	n	y	n	n	y	n	y	0.13	FALSE	TRUE	15.5	n	1938	TRUE	3.5
C	Jiangxi	2302	2302083	y	1	1	1928	none	illit	none	none	TRUE	NA	y	y	n	2	y	n	n	n	y	NA	y	0.25	FALSE	TRUE	6.5	n	1946	TRUE	11.5
C	Jiangxi	2302	2302084	n	0	0	1933	none	half	none	none	TRUE	TRUE	y	NA	n	4	y	y	n	n	y	y	y	0.16	TRUE	TRUE	16	n	1952	NA	3
C	Jiangxi	2302	2302085	n	0	0	1926	none	illit	none	none	TRUE	TRUE	y	y	n	4	n	n	n	n	y	y	n	NA	TRUE	TRUE	NA	n	1945	NA	NA
C	Jiangxi	2302	2302086	n	0	0	1933	none	half	none	NA	TRUE	FALSE	y	y	y	4	n	n	n	n	y	n	n	NA	FALSE	TRUE	NA	n	1948	NA	NA
C	Jiangxi	2302	2302087	n	0	0	1928	none	half	none	none	TRUE	FALSE	y	y	n	4	y	n	n	n	y	n	y	0.13	FALSE	TRUE	18.5	n	1947	NA	0.5
C	Jiangxi	2302	2302088	y	1	NA	1927	none	illit	none	NA	FALSE	FALSE	n	NA	y	0	n	n	n	n	n	n	n	NA	FALSE	FALSE	NA	n	1943	TRUE	NA
C	Jiangxi	2302	2302089	n	0	0	1938	some	half	none	none	TRUE	FALSE	y	n	n	2	y	n	n	n	n	n	y	0.16	FALSE	FALSE	NA	y	1958	NA	-0.5
C	Jiangxi	2302	2302090	n	0	0	1932	none	illit	none	none	TRUE	TRUE	y	y	n	2	n	y	n	n	y	y	NA	NA	TRUE	TRUE	15.5	n	1949	NA	1.5
C	Jiangxi	2302	2302091	n	0	0	1933	none	half	NA	NA	TRUE	TRUE	y	y	y	4	n	y	n	n	y	n	y	0.09	FALSE	TRUE	NA	n	1949	NA	-1
C	Jiangxi	2302	2302092	n	0	0	1935	none	illit	none	none	TRUE	TRUE	y	y	n	3	y	n	n	n	y	y	y	0.22	TRUE	TRUE	16.5	n	1955	NA	3.5
C	Jiangxi	2302	2302093	n	0	0	1931	none	illit	none	NA	TRUE	TRUE	y	y	y	4	y	n	n	n	n	y	NA	0.13	TRUE	FALSE	15	n	1950	NA	4
C	Jiangxi	2302	2302094	n	0	0	1928	none	illit	none	none	FALSE	TRUE	y	y	NA	NA	n	n	n	n	n	y	n	NA	TRUE	FALSE	NA	n	1946	NA	NA
C	Jiangxi	2302	2302095	n	0	0	1927	none	illit	none	none	TRUE	TRUE	y	y	y	3	n	n	n	n	y	y	n	NA	TRUE	TRUE	NA	n	1944	NA	NA
C	Jiangxi	2302	2302096	n	0	0	1937	none	illit	none	none	TRUE	FALSE	NA	y	y	3	n	n	n	n	y	n	n	NA	FALSE	TRUE	NA	n	1955	NA	NA
C	Jiangxi	2302	2302097	n	0	0	1937	none	half	none	none	TRUE	FALSE	y	y	y	4	n	n	n	n	y	n	y	NA	FALSE	TRUE	NA	y	1957	NA	NA
C	Jiangxi	2302	2302098	n	0	0	1930	some	lit	none	none	FALSE	FALSE	y	y	y	4	n	n	n	n	n	n	n	NA	FALSE	FALSE	NA	n	1949	NA	NA
C	Jiangxi	2302	2302099	n	0	0	1928	none	illit	none	none	TRUE	FALSE	y	y	y	3	n	n	n	n	y	n	n	NA	FALSE	TRUE	NA	n	1945	NA	NA
C	Jiangxi	2302	2302100	n	0	0	1931	none	illit	NA	NA	FALSE	FALSE	y	NA	NA	1	n	n	n	n	n	n	n	NA	FALSE	FALSE	NA	n	1947	NA	NA
C	Jiangxi	2302	2302101	n	0	0	1926	none	illit	none	none	TRUE	FALSE	y	n	n	4	n	n	n	n	y	n	n	NA	FALSE	TRUE	NA	n	1944	NA	NA
C	Jiangxi	2302	2302102	n	0	0	1927	none	illit	none	none	TRUE	FALSE	NA	y	y	3	n	n	n	n	y	n	n	NA	FALSE	TRUE	NA	n	1944	NA	NA
C	Jiangxi	2302	2302103	n	0	0	1937	none	half	none	none	FALSE	FALSE	n	y	y	NA	n	n	n	n	n	n	n	NA	FALSE	FALSE	NA	n	1954	NA	NA
C	Jiangxi	2302	2302104	n	0	0	1938	none	half	none	none	FALSE	FALSE	y	n	n	3	n	n	n	n	n	n	n	NA	FALSE	FALSE	NA	n	1956	NA	NA
C	Jiangxi	2302	2302105	y	1	NA	1927	none	illit	none	none	TRUE	FALSE	y	y	y	4	n	n	n	n	y	n	y	NA	FALSE	TRUE	NA	n	1945	TRUE	NA
C	Jiangxi	2302	2302106	n	0	0	1931	none	illit	none	none	FALSE	FALSE	n	n	n	NA	n	n	n	n	n	n	n	NA	FALSE	FALSE	NA	y	1947	NA	NA
C	Jiangxi	2302	2302107	n	0	0	1938	none	illit	none	none	FALSE	FALSE	y	y	n	1	n	n	n	n	n	n	n	NA	FALSE	FALSE	NA	n	1956	NA	NA
C	Jiangxi	2302	2302108	n	0	0	1926	none	illit	NA	NA	FALSE	FALSE	y	NA	n	4	n	n	n	n	n	n	n	NA	FALSE	FALSE	NA	n	1943	NA	NA
C	Jiangxi	2302	2302109	n	0	0	1930	some	lit	none	none	TRUE	FALSE	n	n	n	1	n	n	n	n	y	n	n	NA	FALSE	TRUE	NA	n	1948	NA	NA
C	Jiangxi	2302	2302110	n	0	0	1938	some	lit	none	none	TRUE	FALSE	y	n	y	4	n	n	n	n	y	n	n	NA	FALSE	TRUE	NA	y	1956	NA	NA
C	Jiangxi	2302	2302111	n	0	0	1940	none	half	none	none	FALSE	FALSE	n	y	n	4	n	n	n	n	n	n	n	NA	FALSE	FALSE	NA	n	1956	NA	NA
C	Jiangxi	2302	2302112	n	0	0	1933	some	half	none	none	FALSE	FALSE	NA	y	n	4	n	n	n	n	n	n	n	NA	FALSE	FALSE	NA	n	1950	NA	NA
C	Jiangxi	2302	2302113	n	0	0	1927	none	illit	NA	NA	FALSE	TRUE	n	y	n	4	n	n	n	n	n	y	n	NA	TRUE	FALSE	NA	n	1950	NA	NA
C	Jiangxi	2302	2302114	n	0	0	1928	none	illit	none	NA	FALSE	FALSE	y	n	y	4	n	n	n	n	n	n	n	NA	FALSE	FALSE	NA	n	1946	NA	NA
C	Jiangxi	2302	2302115	n	0	0	1934	some	lit	none	none	TRUE	TRUE	n	y	y	3	n	y	n	n	y	y	n	0.28	TRUE	TRUE	10	n	1950	NA	6
C	Jiangxi	2302	2302116	n	0	0	1929	none	illit	NA	NA	TRUE	TRUE	y	y	y	4	y	n	n	n	y	y	NA	0.13	TRUE	TRUE	10.5	n	1946	NA	6.5
C	Jiangxi	2302	2302117	n	0	0	1929	none	illit	none	none	TRUE	FALSE	y	n	n	2	n	n	n	n	y	n	n	NA	FALSE	TRUE	17	n	1946	NA	0
C	Jiangxi	2302	2302118	n	0	0	1940	none	illit	none	none	FALSE	FALSE	y	n	y	2	n	n	n	n	n	n	y	NA	FALSE	FALSE	NA	n	1956	NA	NA
C	Jiangxi	2302	2302119	n	0	0	1931	none	half	none	none	TRUE	NA	y	y	y	1	n	n	n	n	y	NA	n	NA	FALSE	TRUE	10.5	n	1950	NA	8.5
C	Jiangxi	2302	2302120	n	0	0	1932	none	half	none	none	TRUE	TRUE	n	y	n	0	y	n	n	n	y	y	NA	0.25	TRUE	TRUE	8	n	1949	NA	9
C	Jiangxi	2302	2302121	y	1	1	1917	none	illit	none	none	NA	NA	n	y	n	0	n	y	n	n	NA	NA	y	NA	FALSE	FALSE	6	n	1934	TRUE	11
C	Jiangxi	2302	2302122	n	0	0	1928	none	illit	none	none	NA	NA	NA	n	n	4	y	y	n	n	NA	NA	y	0.22	FALSE	FALSE	10.5	y	1945	NA	6.5
C	Jiangxi	2302	2302123	n	0	0	1933	none	half	none	NA	TRUE	TRUE	y	y	y	2	y	y	n	n	y	y	NA	NA	TRUE	TRUE	14.5	n	1950	NA	2.5
C	Jiangxi	2302	2302124	n	0	0	1937	none	illit	none	none	TRUE	FALSE	y	y	y	4	n	n	n	n	y	n	n	NA	FALSE	TRUE	NA	n	1955	NA	NA
C	Jiangxi	2302	2302125	n	0	0	1936	none	illit	none	none	TRUE	FALSE	y	y	NA	4	n	n	n	n	y	n	n	NA	FALSE	TRUE	NA	n	1951	NA	NA
C	Jiangxi	2302	2302126	n	0	0	1927	none	illit	none	none	TRUE	TRUE	y	y	y	2	n	n	n	n	y	y	n	NA	TRUE	TRUE	NA	n	1945	NA	NA
C	Jiangxi	2302	2302127	n	0	0	1926	none	illit	none	some	TRUE	TRUE	y	y	y	4	y	y	n	n	y	y	n	NA	TRUE	TRUE	10	n	1942	NA	6
C	Jiangxi	2302	2302128	n	0	0	1938	none	half	NA	NA	TRUE	TRUE	y	y	y	4	n	n	n	n	y	y	n	NA	TRUE	TRUE	NA	n	1956	NA	NA
C	Jiangxi	2302	2302129	n	0	0	1932	none	illit	NA	NA	FALSE	TRUE	y	y	NA	4	n	n	n	n	n	y	n	NA	TRUE	FALSE	NA	n	1951	NA	NA
C	Jiangxi	2302	2302130	n	0	0	1939	some	lit	none	none	TRUE	TRUE	n	y	y	NA	n	n	n	n	y	y	n	NA	TRUE	TRUE	NA	n	1959	NA	NA
C	Jiangxi	2302	2302131	n	0	0	1935	none	illit	none	none	TRUE	TRUE	y	y	y	4	n	n	n	n	y	y	n	NA	TRUE	TRUE	NA	n	1953	NA	NA
C	Jiangxi	2302	2302132	n	0	0	1925	none	illit	none	none	TRUE	FALSE	y	y	y	4	n	n	n	n	y	n	n	NA	FALSE	TRUE	NA	n	1945	NA	NA
C	Jiangxi	2302	2302133	n	0	0	1937	none	illit	none	some	TRUE	FALSE	y	n	n	4	n	n	n	n	y	n	n	NA	FALSE	TRUE	NA	n	1957	NA	NA
C	Jiangxi	2302	2302134	n	0	0	1928	some	lit	none	some	TRUE	TRUE	n	n	y	NA	n	y	n	n	y	n	n	NA	FALSE	TRUE	NA	n	1944	NA	NA
C	Jiangxi	2302	2302135	n	0	0	1936	none	illit	none	none	FALSE	TRUE	n	y	n	4	n	n	n	n	n	y	n	NA	TRUE	FALSE	NA	n	1954	NA	NA
C	Jiangxi	2302	2302136	n	0	0	1934	none	illit	none	none	FALSE	FALSE	y	y	n	4	n	n	n	n	n	n	n	NA	FALSE	FALSE	NA	n	1954	NA	NA
C	Jiangxi	2302	2302137	y	1	NA	1921	none	illit	none	none	TRUE	FALSE	y	y	n	4	n	n	n	n	y	n	n	NA	FALSE	TRUE	NA	n	1939	TRUE	NA
C	Jiangxi	2302	2302138	n	0	0	1928	none	illit	none	none	FALSE	FALSE	n	y	y	1	n	n	n	n	n	n	n	NA	FALSE	FALSE	NA	n	1949	NA	NA
C	Jiangxi	2302	2302139	n	0	0	1930	none	illit	none	some	TRUE	FALSE	n	y	y	1	y	n	n	n	y	n	n	NA	FALSE	TRUE	10	n	1950	NA	10
C	Jiangxi	2302	2302140	n	0	0	1937	some	lit	none	some	TRUE	FALSE	n	y	y	3	n	n	n	n	y	n	n	NA	FALSE	TRUE	NA	n	1957	NA	NA
C	Jiangxi	2302	2302141	n	0	0	1933	none	illit	none	none	FALSE	TRUE	y	y	n	2	n	n	n	n	n	y	n	NA	TRUE	FALSE	NA	n	1956	NA	NA
C	Jiangxi	2302	2302142	y	1	1	1916	none	illit	none	some	TRUE	TRUE	y	n	y	4	y	y	n	n	y	n	n	0.16	FALSE	TRUE	NA	n	1935	TRUE	NA
C	Jiangxi	2302	2302143	n	0	0	1920	some	half	some	some	TRUE	FALSE	n	y	y	1	n	n	n	n	y	n	n	NA	FALSE	TRUE	NA	n	1946	NA	NA
C	Jiangxi	2302	2302144	n	0	0	1929	none	illit	none	none	FALSE	FALSE	y	n	y	4	n	n	n	n	n	n	y	NA	FALSE	FALSE	NA	n	1945	NA	NA
C	Jiangxi	2302	2302145	n	0	0	1939	some	lit	none	some	TRUE	FALSE	y	y	y	4	n	n	n	n	y	n	n	NA	FALSE	TRUE	NA	n	1959	NA	NA
C	Jiangxi	2302	2302146	n	0	0	1938	none	illit	none	none	TRUE	TRUE	y	y	n	4	n	y	n	n	y	n	y	0.5	FALSE	TRUE	7.5	y	1957	NA	11.5
C	Jiangxi	2302	2302147	n	0	0	1933	none	illit	none	none	TRUE	TRUE	y	y	y	4	n	y	n	n	y	y	n	NA	TRUE	TRUE	14.5	n	1951	NA	3.5
C	Jiangxi	2302	2302148	n	0	0	1932	none	illit	none	none	FALSE	FALSE	n	y	n	3	n	n	n	n	n	n	y	NA	FALSE	FALSE	NA	n	1947	NA	NA
C	Jiangxi	2302	2302149	y	1	1	1933	none	half	none	none	TRUE	TRUE	n	y	n	1	y	y	n	n	y	n	n	1	FALSE	TRUE	NA	n	1941	TRUE	NA
C	Jiangxi	2302	2302150	n	0	0	1938	none	illit	none	none	TRUE	TRUE	y	y	y	1	n	y	n	n	y	n	y	NA	FALSE	TRUE	14.5	n	1955	NA	2.5
C	Jiangxi	2302	2302151	y	1	NA	1928	some	lit	none	some	TRUE	TRUE	y	n	y	4	n	y	n	n	y	y	y	0.5	TRUE	TRUE	12.5	n	1946	TRUE	5.5
C	Jiangxi	2302	2302152	n	0	0	1927	none	illit	none	none	TRUE	TRUE	y	y	y	4	y	y	n	n	y	y	y	0.19	TRUE	TRUE	NA	y	1942	NA	NA
C	Jiangxi	2302	2302153	y	1	NA	1917	none	illit	none	none	TRUE	NA	y	y	NA	4	n	n	n	n	y	NA	n	NA	FALSE	TRUE	NA	n	1936	TRUE	NA
C	Jiangxi	2302	2302154	y	1	NA	1926	none	illit	none	none	TRUE	FALSE	y	y	n	4	n	n	n	n	y	n	n	NA	FALSE	TRUE	NA	n	1944	TRUE	NA
C	Jiangxi	2302	2302155	n	0	0	1935	none	illit	none	NA	TRUE	FALSE	NA	y	y	2	y	n	n	n	y	n	y	NA	FALSE	TRUE	NA	n	1949	NA	NA
C	Jiangxi	2302	2302156	n	0	0	1938	none	illit	none	none	TRUE	TRUE	y	NA	NA	4	y	y	n	n	y	n	y	0.25	FALSE	TRUE	NA	y	1962	NA	NA
C	Jiangxi	2302	2302157	n	0	0	1940	some	half	none	none	TRUE	NA	y	y	NA	4	y	n	n	n	y	NA	y	NA	FALSE	TRUE	NA	n	1957	NA	NA
C	Jiangxi	2302	2302158	n	0	0	1941	none	illit	none	NA	FALSE	FALSE	y	y	y	4	n	n	n	n	n	n	y	NA	FALSE	FALSE	NA	n	1958	NA	NA
C	Jiangxi	2302	2302159	y	1	NA	1919	none	illit	none	none	TRUE	TRUE	y	y	NA	NA	n	y	n	n	y	n	NA	NA	FALSE	TRUE	NA	NA	1941	TRUE	NA
C	Jiangxi	2302	2302160	n	0	0	1924	none	illit	none	some	FALSE	FALSE	NA	NA	y	1	n	n	n	n	n	n	n	NA	FALSE	FALSE	NA	n	1940	NA	NA
C	Jiangxi	2302	2302161	n	0	0	1934	none	illit	NA	NA	TRUE	TRUE	y	y	n	4	n	y	n	n	y	n	NA	0.22	FALSE	TRUE	12.5	n	1954	NA	7.5
C	Jiangxi	2302	2302162	n	0	0	1933	none	illit	none	none	TRUE	FALSE	y	y	y	4	n	n	n	n	y	n	y	NA	FALSE	TRUE	NA	n	1956	NA	NA
C	Jiangxi	2302	2302163	n	0	0	1933	none	illit	none	none	TRUE	TRUE	y	y	y	4	n	n	n	n	y	y	NA	NA	TRUE	TRUE	NA	n	1950	NA	NA
C	Jiangxi	2302	2302164	n	0	0	1937	none	illit	none	none	TRUE	FALSE	y	y	y	4	n	n	n	n	y	n	n	NA	FALSE	TRUE	NA	n	1956	NA	NA
C	Jiangxi	2302	2302165	y	1	NA	1924	none	illit	none	some	NA	NA	y	y	n	1	n	n	n	n	NA	NA	y	NA	FALSE	FALSE	NA	n	1940	NA	NA
C	Jiangxi	2302	2302166	y	1	1	1924	some	half	none	some	TRUE	FALSE	n	y	n	4	n	n	n	n	y	n	n	NA	FALSE	TRUE	NA	n	1943	TRUE	NA
C	Jiangxi	2302	2302167	NA	NA	NA	1938	some	half	none	some	TRUE	FALSE	y	y	n	4	y	n	n	n	y	n	y	0.22	FALSE	TRUE	NA	n	1957	NA	NA
C	Jiangxi	2302	2302168	n	0	0	1937	none	illit	none	some	TRUE	TRUE	y	y	n	4	n	n	n	n	y	y	n	NA	TRUE	TRUE	NA	n	1952	NA	NA
C	Jiangxi	2302	2302169	n	0	0	1935	some	half	none	none	NA	TRUE	n	y	n	0	n	n	n	n	NA	y	n	NA	TRUE	FALSE	NA	n	1956	NA	NA
C	Jiangxi	2302	2302170	n	0	0	1935	none	illit	none	some	NA	NA	y	y	y	4	n	n	n	n	NA	NA	y	NA	FALSE	FALSE	NA	n	1954	NA	NA
C	Jiangxi	2302	2302171	n	0	0	1932	none	illit	none	some	NA	NA	y	y	n	4	n	y	n	n	NA	NA	y	0.09	FALSE	FALSE	NA	n	1948	NA	NA
C	Jiangxi	2302	2302172	n	0	0	1932	some	half	none	none	TRUE	TRUE	y	y	y	3	y	n	n	n	y	y	y	0.25	TRUE	TRUE	NA	n	1951	NA	NA
C	Jiangxi	2302	2302173	n	0	0	1921	none	illit	none	none	NA	TRUE	y	y	y	3	y	n	n	n	NA	y	n	0.13	TRUE	FALSE	NA	n	1940	NA	NA
C	Jiangxi	2302	2302174	y	1	1	1920	none	illit	none	some	TRUE	TRUE	y	y	y	4	n	n	n	n	y	y	n	NA	TRUE	TRUE	NA	n	1938	TRUE	NA
C	Jiangxi	2302	2302175	n	0	0	1932	none	illit	none	none	TRUE	FALSE	y	y	n	2	y	n	n	n	y	n	n	0.06	FALSE	TRUE	NA	n	1950	NA	NA
C	Jiangxi	2302	2302176	n	0	0	1932	none	illit	none	none	FALSE	FALSE	n	y	n	1	n	n	n	n	n	n	n	NA	FALSE	FALSE	NA	n	1951	NA	NA
C	Jiangxi	2302	2302177	y	1	NA	1920	some	illit	none	none	TRUE	FALSE	n	n	y	2	n	n	n	n	y	n	n	NA	FALSE	TRUE	NA	n	1939	NA	NA
C	Jiangxi	2302	2302178	n	0	0	1934	none	half	none	none	TRUE	TRUE	NA	y	n	4	n	n	n	n	y	y	n	NA	TRUE	TRUE	NA	n	1953	NA	NA
C	Jiangxi	2302	2302179	n	0	0	1928	none	illit	none	some	TRUE	FALSE	NA	y	NA	NA	y	n	n	n	y	n	y	0.06	FALSE	TRUE	NA	y	1944	NA	NA
C	Jiangxi	2302	2302180	n	0	0	1930	none	illit	none	none	TRUE	TRUE	y	y	n	3	n	y	n	n	y	y	n	0.16	TRUE	TRUE	NA	n	1948	NA	NA
C	Jiangxi	2302	2302181	n	0	0	1932	none	illit	none	some	TRUE	FALSE	n	y	n	4	n	n	n	n	y	n	n	NA	FALSE	TRUE	NA	n	1952	NA	NA
C	Jiangxi	2302	2302182	n	0	0	1936	some	half	none	some	FALSE	FALSE	y	y	NA	1	n	n	n	n	n	n	n	NA	FALSE	FALSE	NA	n	1956	NA	NA
C	Jiangxi	2302	2302183	n	0	0	1928	none	illit	none	none	TRUE	TRUE	y	y	y	4	n	n	n	n	y	y	n	NA	TRUE	TRUE	NA	n	1946	NA	NA
C	Jiangxi	2302	2302184	n	0	0	1938	some	half	none	some	TRUE	FALSE	NA	n	y	4	n	n	n	n	y	n	n	NA	FALSE	TRUE	NA	n	1955	NA	NA
C	Jiangxi	2302	2302185	n	0	0	1933	none	illit	none	none	TRUE	FALSE	y	y	y	2	n	n	n	n	y	n	n	NA	FALSE	TRUE	NA	n	1953	NA	NA
C	Jiangxi	2302	2302186	n	0	0	1937	none	illit	none	none	TRUE	FALSE	y	n	n	2	n	n	n	n	y	n	n	NA	FALSE	TRUE	NA	n	1951	NA	NA
C	Jiangxi	2302	2302187	n	0	0	1933	none	illit	none	some	TRUE	FALSE	y	y	n	4	n	n	n	n	y	n	n	NA	FALSE	TRUE	NA	n	1949	NA	NA
C	Jiangxi	2302	2302188	n	0	0	1933	none	half	none	none	FALSE	FALSE	n	y	NA	1	n	n	n	n	n	n	n	NA	FALSE	FALSE	NA	n	1951	NA	NA
C	Jiangxi	2302	2302189	n	0	0	1939	none	illit	none	some	TRUE	FALSE	y	n	n	4	n	n	n	n	y	n	n	NA	FALSE	TRUE	NA	n	1956	NA	NA
C	Jiangxi	2302	2302190	n	0	0	1939	some	half	none	some	FALSE	FALSE	y	n	n	4	n	n	n	n	n	n	n	NA	FALSE	FALSE	NA	n	1960	NA	NA
C	Jiangxi	2302	2302191	n	0	0	1928	none	illit	none	NA	FALSE	FALSE	y	y	n	4	n	n	n	n	n	n	n	NA	FALSE	FALSE	NA	n	1945	NA	NA
C	Jiangxi	2302	2302192	n	0	0	1934	none	illit	none	none	FALSE	FALSE	y	y	y	4	n	n	n	n	n	n	n	NA	FALSE	FALSE	NA	n	1952	NA	NA
C	Jiangxi	2302	2302193	n	0	0	1939	none	half	none	some	FALSE	FALSE	y	y	y	4	n	n	n	n	n	n	n	NA	FALSE	FALSE	NA	n	1957	NA	NA
C	Jiangxi	2302	2302194	n	0	0	1940	none	illit	none	some	TRUE	FALSE	y	y	y	4	n	n	n	n	y	n	n	NA	FALSE	TRUE	NA	n	1958	NA	NA
C	Jiangxi	2302	2302195	y	1	NA	1927	none	illit	none	some	TRUE	TRUE	y	y	y	4	n	n	n	n	y	y	n	NA	TRUE	TRUE	NA	n	1946	NA	NA
C	Jiangxi	2302	2302196	n	0	0	1922	none	illit	none	none	TRUE	TRUE	y	y	n	3	n	n	n	n	y	y	n	NA	TRUE	TRUE	NA	n	1945	NA	NA
C	Jiangxi	2302	2302197	n	0	0	1937	none	illit	none	none	TRUE	FALSE	y	y	n	2	n	n	n	n	y	n	n	NA	FALSE	TRUE	NA	n	1954	NA	NA
C	Jiangxi	2302	2302198	n	0	0	1933	none	illit	none	none	TRUE	TRUE	y	y	y	4	n	n	n	n	y	y	n	NA	TRUE	TRUE	NA	n	1951	NA	NA
C	Jiangxi	2302	2302199	n	0	0	1932	none	illit	none	none	TRUE	FALSE	y	y	y	2	y	n	n	n	y	n	y	0.25	FALSE	TRUE	NA	n	1949	NA	NA
C	Jiangxi	2302	2302200	n	0	0	1933	none	illit	none	some	TRUE	TRUE	y	y	y	3	n	y	n	n	y	n	y	0.5	FALSE	TRUE	NA	n	1949	NA	NA
C	Jiangxi	2302	2302201	n	0	0	1934	none	illit	none	none	TRUE	TRUE	y	y	n	4	n	n	n	n	y	y	n	NA	TRUE	TRUE	NA	n	1951	NA	NA
C	Jiangxi	2302	2302202	n	0	0	1938	none	illit	none	none	TRUE	FALSE	n	y	n	NA	n	n	n	n	y	n	n	NA	FALSE	TRUE	NA	n	1954	NA	NA
C	Jiangxi	2302	2302203	n	0	0	1935	none	illit	none	none	TRUE	TRUE	y	y	n	1	y	y	n	n	y	n	y	0.25	FALSE	TRUE	NA	n	1953	NA	NA
C	Jiangxi	2302	2302204	n	0	0	1936	none	illit	none	none	TRUE	FALSE	n	y	n	1	n	n	n	n	y	n	n	NA	FALSE	TRUE	NA	n	1953	NA	NA
C	Jiangxi	2302	2302205	n	0	0	1928	none	illit	none	none	TRUE	TRUE	y	y	y	3	n	y	n	n	y	n	y	0.5	FALSE	TRUE	NA	n	1947	NA	NA
N	Shaanxi	2701	2701001	y	1	NA	1923	none	illit	none	none	TRUE	TRUE	NA	y	n	4	y	y	y	y	y	y	NA	NA	TRUE	TRUE	NA	y	1939	TRUE	NA
N	Shaanxi	2701	2701002	y	1	NA	1927	none	illit	none	none	TRUE	TRUE	y	y	n	2	y	y	n	n	n	n	NA	NA	FALSE	FALSE	10	n	1940	TRUE	3
N	Shaanxi	2701	2701003	y	1	NA	1928	none	illit	none	none	FALSE	FALSE	y	y	y	4	n	n	n	n	n	n	NA	NA	FALSE	FALSE	20	n	1942	TRUE	-6
N	Shaanxi	2701	2701004	y	1	1	1923	none	illit	none	NA	TRUE	FALSE	y	y	y	4	y	n	n	n	y	n	NA	NA	FALSE	TRUE	15	y	1941	TRUE	3
N	Shaanxi	2701	2701005	y	1	1	1923	none	illit	none	NA	TRUE	FALSE	NA	y	y	4	n	n	n	n	y	n	NA	NA	FALSE	TRUE	20	y	1938	TRUE	-5
N	Shaanxi	2701	2701006	y	1	1	1924	none	illit	none	none	TRUE	FALSE	NA	y	y	4	n	n	n	n	y	n	NA	NA	FALSE	TRUE	15.5	y	1939	TRUE	-0.5
N	Shaanxi	2701	2701007	y	1	1	1922	none	illit	none	none	TRUE	FALSE	NA	y	n	4	n	n	n	n	y	n	NA	NA	FALSE	TRUE	18	y	1936	TRUE	-4
N	Shaanxi	2701	2701008	y	1	1	1926	none	illit	none	none	TRUE	FALSE	y	y	y	4	y	n	n	n	y	n	NA	NA	FALSE	TRUE	10	n	1941	TRUE	5
N	Shaanxi	2701	2701009	n	0	0	1932	some	half	NA	NA	TRUE	FALSE	NA	y	y	4	y	n	n	n	y	n	NA	NA	FALSE	TRUE	15	y	1949	NA	2
N	Shaanxi	2701	2701010	n	0	0	1937	none	illit	none	NA	TRUE	FALSE	y	y	y	3	y	n	n	n	y	n	NA	NA	FALSE	TRUE	11.5	n	1954	NA	5.5
N	Shaanxi	2701	2701011	n	0	0	1935	some	lit	none	none	TRUE	FALSE	NA	n	y	4	y	n	n	n	y	n	NA	NA	FALSE	TRUE	11.5	n	1952	NA	5.5
N	Shaanxi	2701	2701012	y	1	NA	1933	none	illit	none	NA	TRUE	TRUE	y	y	y	4	y	n	y	y	y	n	NA	NA	TRUE	TRUE	11.5	y	1949	TRUE	4.5
N	Shaanxi	2701	2701013	n	0	0	1935	none	illit	none	none	TRUE	FALSE	y	y	n	4	y	n	n	n	y	n	NA	NA	FALSE	TRUE	12	y	1950	NA	3
N	Shaanxi	2701	2701014	y	1	NA	1926	none	illit	none	none	TRUE	FALSE	y	y	y	4	y	n	n	n	y	n	NA	NA	FALSE	TRUE	12.5	y	1941	TRUE	2.5
N	Shaanxi	2701	2701015	y	1	NA	1931	none	illit	none	none	TRUE	FALSE	y	y	y	3	y	n	n	n	n	n	NA	NA	FALSE	FALSE	5.5	n	1950	TRUE	13.5
N	Shaanxi	2701	2701016	n	0	0	1936	none	illit	none	none	TRUE	FALSE	y	y	y	3	y	n	n	n	y	n	NA	NA	FALSE	TRUE	12.5	y	1950	NA	1.5
N	Shaanxi	2701	2701017	n	0	0	1929	none	illit	none	none	TRUE	FALSE	NA	y	y	4	y	n	n	n	n	n	NA	NA	FALSE	FALSE	14	n	1943	NA	0
N	Shaanxi	2701	2701018	n	0	0	1933	none	illit	none	none	TRUE	FALSE	y	y	y	4	y	n	y	n	y	n	NA	NA	FALSE	TRUE	9	y	1950	NA	8
N	Shaanxi	2701	2701019	n	0	0	1935	none	illit	none	none	TRUE	FALSE	y	y	n	4	y	n	n	n	y	n	NA	NA	FALSE	TRUE	12	y	1950	NA	3
N	Shaanxi	2701	2701020	n	0	0	1937	none	illit	none	none	TRUE	FALSE	y	y	NA	3	y	n	n	n	y	n	NA	NA	FALSE	TRUE	15	y	1956	NA	4
N	Shaanxi	2701	2701021	y	1	1	1927	none	illit	none	none	FALSE	FALSE	y	y	y	3	n	n	n	n	n	n	NA	NA	FALSE	FALSE	17	n	1944	TRUE	0
N	Shaanxi	2701	2701022	n	0	0	1941	some	half	none	none	TRUE	FALSE	n	y	y	4	y	n	n	n	y	n	NA	NA	FALSE	TRUE	12	y	1956	NA	3
N	Shaanxi	2701	2701023	n	0	0	1934	none	illit	none	none	TRUE	FALSE	n	y	NA	4	y	n	n	n	n	n	NA	NA	FALSE	FALSE	NA	y	1949	NA	NA
N	Shaanxi	2701	2701024	n	0	0	1937	none	illit	none	none	TRUE	FALSE	y	y	NA	4	y	n	n	n	y	n	NA	NA	FALSE	TRUE	13	y	1955	NA	5
N	Shaanxi	2701	2701026	n	0	0	1931	none	illit	none	none	TRUE	FALSE	y	y	NA	4	y	n	n	n	y	n	NA	NA	FALSE	TRUE	16	n	1948	NA	1
N	Shaanxi	2701	2701027	n	0	0	1940	none	illit	none	none	TRUE	FALSE	y	y	NA	3	n	n	n	n	y	n	NA	NA	FALSE	TRUE	NA	n	1957	NA	NA
N	Shaanxi	2701	2701029	y	1	NA	1915	none	illit	none	NA	TRUE	TRUE	y	NA	y	4	y	y	y	y	y	n	NA	NA	TRUE	TRUE	NA	y	1930	NA	NA
N	Shaanxi	2701	2701030	y	1	1	1922	none	illit	none	none	TRUE	FALSE	n	NA	y	4	y	n	n	n	y	n	NA	NA	FALSE	TRUE	12.5	y	1938	TRUE	3.5
N	Shaanxi	2701	2701031	y	1	1	1921	none	illit	none	NA	TRUE	FALSE	y	y	y	3	n	n	n	n	y	n	NA	NA	FALSE	TRUE	22.5	n	1936	TRUE	-7.5
N	Shaanxi	2701	2701032	y	1	NA	1927	none	illit	none	NA	TRUE	FALSE	n	y	n	4	y	n	n	n	n	n	NA	NA	FALSE	FALSE	12.5	y	1941	TRUE	1.5
N	Shaanxi	2701	2701033	y	1	NA	1928	none	illit	none	none	FALSE	FALSE	y	y	y	4	n	n	n	n	n	n	NA	NA	FALSE	FALSE	16.5	n	1943	TRUE	-1.5
N	Shaanxi	2701	2701034	y	1	NA	1921	none	illit	none	NA	TRUE	TRUE	y	y	y	4	y	y	y	n	y	n	NA	NA	FALSE	TRUE	10	y	1937	TRUE	6
N	Shaanxi	2701	2701035	y	1	1	1924	none	illit	none	none	TRUE	TRUE	y	y	y	4	y	y	y	n	y	n	NA	NA	FALSE	TRUE	7.5	y	1940	TRUE	8.5
N	Shaanxi	2701	2701036	y	1	NA	1916	some	half	none	NA	TRUE	FALSE	n	NA	NA	0	y	n	y	n	y	n	NA	NA	FALSE	TRUE	12	n	1930	TRUE	2
N	Shaanxi	2701	2701037	n	0	0	1930	none	illit	none	none	TRUE	FALSE	y	y	y	4	y	n	y	n	y	n	NA	NA	FALSE	TRUE	10	y	1947	NA	7
N	Shaanxi	2701	2701039	y	1	NA	1921	none	illit	none	none	TRUE	FALSE	NA	NA	y	3	y	n	n	n	n	n	NA	NA	FALSE	FALSE	8.5	y	1934	TRUE	4.5
N	Shaanxi	2701	2701040	y	1	1	1923	none	illit	none	none	TRUE	FALSE	n	y	n	4	y	n	n	n	y	n	NA	NA	FALSE	TRUE	14.5	y	1941	TRUE	3.5
N	Shaanxi	2701	2701041	y	1	1	1926	none	illit	none	none	FALSE	FALSE	y	y	y	4	n	n	n	n	n	n	NA	NA	FALSE	FALSE	15	y	1940	TRUE	-1
N	Shaanxi	2701	2701042	y	1	NA	1920	none	illit	none	none	FALSE	FALSE	n	y	y	4	n	n	n	n	n	n	NA	NA	FALSE	FALSE	11.5	y	1939	TRUE	7.5
N	Shaanxi	2701	2701043	n	0	0	1932	none	illit	none	none	TRUE	FALSE	n	y	y	4	n	n	n	n	y	n	NA	NA	FALSE	TRUE	17.5	y	1949	NA	-0.5
N	Shaanxi	2701	2701044	n	0	0	1933	none	illit	none	none	TRUE	FALSE	y	y	y	4	y	n	y	n	y	n	NA	NA	FALSE	TRUE	13.5	y	1948	NA	1.5
N	Shaanxi	2701	2701045	n	0	0	1936	none	illit	none	NA	TRUE	FALSE	y	y	y	4	y	n	y	n	y	n	NA	NA	FALSE	TRUE	12.5	y	1953	NA	4.5
N	Shaanxi	2701	2701046	n	0	0	1930	none	illit	none	NA	TRUE	FALSE	y	y	y	4	y	n	y	n	y	n	NA	NA	FALSE	TRUE	14	y	1946	NA	2
N	Shaanxi	2701	2701055	y	1	1	1930	none	illit	none	none	TRUE	FALSE	y	y	n	4	y	n	y	n	y	n	NA	NA	FALSE	TRUE	18.5	y	1947	TRUE	-1.5
N	Shaanxi	2701	2701056	y	1	1	1930	none	illit	none	none	TRUE	FALSE	y	y	n	4	y	n	y	n	y	n	NA	NA	FALSE	TRUE	11.5	y	1947	TRUE	5.5
N	Shaanxi	2701	2701057	y	1	NA	1929	none	illit	none	none	TRUE	FALSE	n	y	n	4	y	n	y	n	y	n	NA	NA	FALSE	TRUE	8.5	y	1945	TRUE	7.5
N	Shaanxi	2701	2701058	y	1	NA	1921	none	illit	none	none	TRUE	FALSE	n	y	y	NA	y	n	n	n	n	n	NA	NA	FALSE	FALSE	11.5	n	1933	TRUE	0.5
N	Shaanxi	2701	2701059	y	1	1	1923	none	illit	none	none	TRUE	FALSE	y	y	y	4	y	n	n	n	y	n	NA	NA	FALSE	TRUE	15	n	1938	TRUE	0
N	Shaanxi	2701	2701060	y	1	1	1929	some	half	none	none	TRUE	TRUE	y	y	y	4	y	n	y	y	y	y	NA	NA	TRUE	TRUE	14.5	y	1948	TRUE	4.5
N	Shaanxi	2701	2701061	n	0	0	1938	none	illit	none	none	TRUE	FALSE	y	y	y	4	y	n	y	n	y	n	NA	NA	FALSE	TRUE	12.5	y	1959	NA	8.5
N	Shaanxi	2701	2701062	n	0	0	1937	none	illit	none	none	TRUE	FALSE	y	y	y	4	y	n	y	n	y	n	NA	NA	FALSE	TRUE	14.5	y	1955	NA	3.5
N	Shaanxi	2701	2701063	n	0	0	1937	none	illit	none	none	TRUE	FALSE	y	y	y	3	y	n	y	n	y	n	NA	NA	FALSE	TRUE	17.5	n	1954	NA	-0.5
N	Shaanxi	2701	2701064	n	0	0	1933	none	illit	none	none	TRUE	FALSE	y	y	y	4	y	n	n	n	y	n	NA	NA	FALSE	TRUE	18.5	y	1951	NA	-0.5
N	Shaanxi	2701	2701065	n	0	0	1935	none	illit	none	none	TRUE	FALSE	y	y	y	4	y	n	y	n	y	n	NA	NA	FALSE	TRUE	15.5	y	1954	NA	3.5
N	Shaanxi	2701	2701067	y	1	1	1926	none	illit	none	none	TRUE	FALSE	y	y	y	4	y	n	y	n	y	n	NA	NA	FALSE	TRUE	13.5	y	1943	TRUE	3.5
N	Shaanxi	2701	2701068	y	1	NA	1920	none	illit	none	NA	TRUE	FALSE	y	y	n	4	y	n	y	n	y	n	NA	NA	FALSE	TRUE	7.5	y	1935	TRUE	7.5
N	Shaanxi	2701	2701069	y	1	NA	1930	none	illit	none	none	TRUE	FALSE	n	y	n	2	y	n	n	n	y	n	NA	NA	FALSE	TRUE	13.5	y	1947	TRUE	3.5
N	Shaanxi	2701	2701071	n	0	0	1941	some	lit	none	none	TRUE	FALSE	y	y	y	4	y	n	n	n	y	n	NA	NA	FALSE	TRUE	14.5	n	1959	NA	3.5
N	Shaanxi	2701	2701075	n	0	0	1941	none	illit	none	none	TRUE	FALSE	n	y	y	4	y	n	n	n	y	n	NA	NA	FALSE	TRUE	15.5	n	1960	NA	3.5
N	Shaanxi	2701	2701076	y	1	1	1928	none	illit	none	none	TRUE	FALSE	y	y	n	4	y	n	n	n	y	n	NA	NA	FALSE	TRUE	12.5	y	1943	TRUE	2.5
N	Shaanxi	2701	2701077	y	1	1	1925	NA	half	none	none	TRUE	FALSE	y	y	y	4	y	n	y	n	y	n	NA	NA	FALSE	TRUE	15.5	y	1941	TRUE	0.5
N	Shaanxi	2701	2701078	n	0	0	1930	none	illit	none	none	TRUE	FALSE	y	NA	n	3	n	n	n	n	y	n	NA	NA	FALSE	TRUE	NA	n	1947	NA	NA
N	Shaanxi	2701	2701079	n	0	0	1931	none	illit	none	none	NA	FALSE	y	y	n	4	NA	n	n	n	y	n	NA	NA	FALSE	TRUE	22	n	1945	NA	-8
N	Shaanxi	2701	2701080	n	0	0	1934	none	illit	none	none	NA	FALSE	y	y	n	3	NA	n	y	n	y	n	NA	NA	FALSE	TRUE	20	n	1951	NA	-3
N	Shaanxi	2701	2701081	n	0	0	1936	none	illit	none	none	TRUE	FALSE	y	y	y	4	y	n	y	n	y	n	NA	NA	FALSE	TRUE	13	y	1950	NA	1
N	Shaanxi	2701	2701082	n	0	0	1935	none	illit	none	none	TRUE	FALSE	y	y	n	0	y	n	n	n	y	n	NA	NA	FALSE	TRUE	12	n	1953	NA	6
N	Shaanxi	2701	2701083	n	0	0	1931	none	illit	none	NA	TRUE	FALSE	y	y	y	4	y	n	y	n	y	n	NA	NA	FALSE	TRUE	17	y	1948	NA	0
N	Shaanxi	2701	2701084	n	0	0	1939	some	half	none	some	TRUE	FALSE	y	y	n	4	y	n	n	n	y	n	NA	NA	FALSE	TRUE	18	y	1957	NA	0
N	Shaanxi	2701	2701085	n	0	0	1934	none	illit	none	none	TRUE	FALSE	y	n	y	3	y	n	y	n	y	n	NA	NA	FALSE	TRUE	12	y	1953	NA	7
N	Shaanxi	2701	2701086	n	0	0	1940	some	half	none	NA	TRUE	FALSE	n	y	y	4	n	n	y	n	y	n	NA	NA	FALSE	TRUE	14	y	1960	NA	6
N	Shaanxi	2701	2701087	y	1	1	1925	none	illit	none	none	TRUE	FALSE	y	y	y	4	y	n	n	n	y	n	NA	NA	FALSE	TRUE	14.5	y	1941	TRUE	1.5
N	Shaanxi	2701	2701088	n	0	0	1930	none	illit	none	none	TRUE	FALSE	y	y	NA	4	y	n	n	n	y	n	NA	NA	FALSE	TRUE	16.5	y	1947	NA	0.5
N	Shaanxi	2701	2701089	n	0	0	1942	none	illit	none	none	TRUE	FALSE	y	n	NA	4	y	n	y	n	y	n	NA	NA	FALSE	TRUE	16.5	n	1960	NA	1.5
N	Shaanxi	2701	2701093	n	0	0	1942	some	lit	none	none	TRUE	TRUE	y	y	NA	4	y	y	y	y	y	n	NA	NA	TRUE	TRUE	13	y	1959	NA	4
N	Shaanxi	2701	2701095	n	0	0	1941	none	illit	none	none	TRUE	FALSE	y	y	y	4	y	n	n	n	y	n	NA	NA	FALSE	TRUE	15	y	1958	NA	2
N	Shaanxi	2701	2701096	y	1	1	1918	none	illit	none	none	TRUE	FALSE	NA	y	y	4	y	n	y	n	y	n	NA	NA	FALSE	TRUE	14.5	n	1934	TRUE	1.5
N	Shaanxi	2701	2701097	y	1	1	1919	none	illit	none	none	TRUE	FALSE	y	y	y	4	y	n	n	n	y	n	NA	NA	FALSE	TRUE	12.5	y	1934	TRUE	2.5
N	Shaanxi	2701	2701098	n	0	0	1933	none	illit	none	none	TRUE	FALSE	y	y	n	4	n	n	n	n	y	n	NA	NA	FALSE	TRUE	18	y	1948	NA	-3
N	Shaanxi	2701	2701099	y	1	1	1930	none	illit	none	none	TRUE	FALSE	y	y	y	4	y	n	y	n	y	n	NA	NA	FALSE	TRUE	10	y	1947	TRUE	7
N	Shaanxi	2701	2701100	y	1	1	1927	none	illit	none	none	TRUE	FALSE	y	y	y	4	y	n	n	n	n	n	NA	NA	FALSE	FALSE	12.5	n	1944	TRUE	4.5
N	Shaanxi	2701	2701101	y	1	1	1925	none	illit	none	some	TRUE	FALSE	y	y	y	4	y	n	y	n	y	n	NA	NA	FALSE	TRUE	12.5	y	1942	TRUE	4.5
N	Shaanxi	2701	2701102	n	0	0	1927	none	illit	none	none	TRUE	FALSE	NA	y	y	4	y	n	y	n	y	n	NA	NA	FALSE	TRUE	12.5	y	1944	NA	4.5
N	Shaanxi	2701	2701103	y	1	1	1923	none	illit	none	none	TRUE	FALSE	n	y	y	4	n	n	n	n	y	n	NA	NA	FALSE	TRUE	17.5	n	1939	TRUE	-1.5
N	Shaanxi	2701	2701104	n	0	0	1926	some	illit	none	none	TRUE	FALSE	n	y	y	4	y	n	n	n	y	n	NA	NA	FALSE	TRUE	11.5	y	1943	NA	5.5
N	Shaanxi	2702	2702001	y	1	1	1927	none	illit	none	none	FALSE	TRUE	y	NA	n	4	n	n	n	n	n	y	NA	NA	TRUE	FALSE	NA	n	1947	TRUE	NA
N	Shaanxi	2702	2702002	y	1	1	1923	none	illit	none	none	TRUE	FALSE	n	NA	y	NA	y	n	y	n	y	n	NA	NA	FALSE	TRUE	NA	NA	1942	TRUE	NA
N	Shaanxi	2702	2702003	y	1	1	1935	some	illit	none	NA	TRUE	FALSE	y	NA	n	4	y	n	y	n	y	n	NA	NA	FALSE	TRUE	NA	n	1955	TRUE	NA
N	Shaanxi	2702	2702004	n	0	0	1935	none	half	none	none	FALSE	FALSE	y	NA	y	3	n	n	n	n	n	n	NA	NA	FALSE	FALSE	NA	n	1953	NA	NA
N	Shaanxi	2702	2702005	n	0	0	1937	none	illit	none	NA	TRUE	FALSE	y	NA	NA	4	y	n	y	n	y	n	NA	NA	FALSE	TRUE	NA	y	1955	NA	NA
N	Shaanxi	2702	2702006	n	0	0	1932	none	illit	none	none	TRUE	FALSE	y	NA	y	2	y	n	n	n	y	n	NA	NA	FALSE	TRUE	NA	n	1948	NA	NA
N	Shaanxi	2702	2702007	y	1	1	1920	none	illit	none	NA	TRUE	TRUE	y	NA	n	4	y	n	y	n	y	y	NA	NA	TRUE	TRUE	NA	y	NA	NA	NA
N	Shaanxi	2702	2702008	y	1	1	1925	none	illit	none	none	TRUE	FALSE	y	NA	y	3	y	n	n	n	n	n	NA	NA	FALSE	FALSE	NA	y	1942	TRUE	NA
N	Shaanxi	2702	2702009	n	0	0	1928	some	half	none	none	TRUE	FALSE	y	NA	n	3	n	n	n	n	y	n	NA	NA	FALSE	TRUE	NA	n	1943	NA	NA
N	Shaanxi	2702	2702010	n	0	0	1937	none	illit	none	NA	TRUE	FALSE	y	NA	NA	4	y	n	y	n	y	n	NA	NA	FALSE	TRUE	NA	n	1955	NA	NA
N	Shaanxi	2702	2702011	y	1	1	1924	none	illit	none	NA	TRUE	TRUE	y	NA	n	3	y	n	y	n	y	y	NA	NA	TRUE	TRUE	NA	y	1941	TRUE	NA
N	Shaanxi	2702	2702012	y	1	1	1918	some	half	none	none	TRUE	FALSE	y	NA	y	3	y	n	y	n	y	n	NA	NA	FALSE	TRUE	NA	NA	1935	TRUE	NA
N	Shaanxi	2702	2702013	y	1	1	1914	none	illit	none	none	TRUE	FALSE	y	NA	y	2	y	n	y	n	y	n	NA	NA	FALSE	TRUE	NA	n	1937	TRUE	NA
N	Shaanxi	2702	2702014	y	1	1	1914	none	illit	NA	some	TRUE	TRUE	y	NA	y	4	y	y	y	y	y	n	NA	NA	TRUE	TRUE	NA	y	1932	TRUE	NA
N	Shaanxi	2702	2702015	y	1	NA	1920	none	illit	none	none	TRUE	NA	NA	NA	y	2	y	n	y	y	y	NA	NA	NA	TRUE	TRUE	NA	n	1938	TRUE	NA
N	Shaanxi	2702	2702016	y	1	1	1914	none	illit	none	none	TRUE	FALSE	NA	NA	n	4	y	n	y	n	n	n	NA	NA	FALSE	TRUE	NA	NA	1931	TRUE	NA
N	Shaanxi	2702	2702017	y	1	NA	1918	none	illit	none	none	TRUE	TRUE	NA	NA	n	4	y	n	y	n	y	y	NA	NA	TRUE	TRUE	NA	y	1937	TRUE	NA
N	Shaanxi	2702	2702018	y	1	1	1914	none	illit	none	none	TRUE	TRUE	y	NA	y	4	y	y	y	y	y	y	NA	NA	TRUE	TRUE	NA	y	1933	TRUE	NA
N	Shaanxi	2702	2702019	y	1	1	1920	none	illit	none	NA	TRUE	NA	y	NA	y	4	y	n	y	n	y	NA	NA	NA	FALSE	TRUE	NA	y	1940	TRUE	NA
N	Shaanxi	2702	2702020	y	1	NA	1916	none	illit	none	none	TRUE	TRUE	y	NA	y	4	y	y	y	y	y	y	NA	NA	TRUE	TRUE	NA	y	1940	TRUE	NA
N	Shaanxi	2702	2702021	n	0	0	1924	none	illit	none	NA	TRUE	TRUE	y	NA	y	4	y	n	n	n	n	y	NA	NA	TRUE	FALSE	NA	y	1939.5	NA	NA
N	Shaanxi	2702	2702022	y	1	1	1925	none	illit	none	none	TRUE	TRUE	y	NA	y	3	y	y	n	n	y	y	NA	NA	TRUE	TRUE	NA	n	1942	TRUE	NA
N	Shaanxi	2702	2702023	y	1	1	1922	none	illit	none	none	TRUE	NA	y	NA	y	4	y	y	y	NA	y	n	NA	NA	FALSE	TRUE	NA	y	1942	TRUE	NA
N	Shaanxi	2702	2702024	y	1	1	1921	none	illit	none	NA	TRUE	FALSE	y	NA	y	4	y	n	y	n	y	n	NA	NA	FALSE	TRUE	NA	y	1942	TRUE	NA
N	Shaanxi	2702	2702025	y	1	1	1924	none	illit	none	NA	TRUE	TRUE	y	NA	y	3	y	y	y	n	y	y	NA	NA	TRUE	TRUE	NA	y	1942	TRUE	NA
N	Shaanxi	2702	2702026	n	0	0	1930	some	illit	none	NA	TRUE	FALSE	y	NA	NA	3	y	n	y	n	y	n	NA	NA	FALSE	TRUE	NA	y	1948	NA	NA
N	Shaanxi	2702	2702027	y	1	NA	1928	none	illit	none	none	TRUE	TRUE	y	NA	n	4	y	y	y	y	y	y	NA	NA	TRUE	TRUE	NA	y	1946	TRUE	NA
N	Shaanxi	2702	2702028	n	0	0	1925	none	illit	none	none	FALSE	FALSE	NA	NA	NA	4	n	n	n	n	n	n	NA	NA	FALSE	FALSE	NA	n	1942	NA	NA
N	Shaanxi	2702	2702029	y	1	1	1927	none	illit	none	NA	TRUE	TRUE	y	NA	y	3	y	y	y	y	y	n	NA	NA	TRUE	TRUE	NA	n	1946	TRUE	NA
N	Shaanxi	2702	2702030	y	1	1	1922	none	illit	none	NA	TRUE	FALSE	y	NA	y	4	y	n	y	n	y	n	NA	NA	FALSE	TRUE	NA	y	1941	TRUE	NA
N	Shaanxi	2702	2702031	y	1	1	1926	none	illit	none	none	TRUE	NA	NA	NA	y	0	y	y	y	n	y	NA	NA	NA	FALSE	TRUE	NA	n	1946	TRUE	NA
N	Shaanxi	2702	2702032	y	1	NA	1925	none	illit	none	some	TRUE	TRUE	y	NA	y	4	y	n	y	n	y	y	NA	NA	TRUE	TRUE	NA	y	1944	NA	NA
N	Shaanxi	2702	2702033	n	0	0	1930	none	illit	none	NA	TRUE	TRUE	y	NA	y	4	y	n	y	y	y	n	NA	NA	TRUE	TRUE	NA	n	1950	NA	NA
N	Shaanxi	2702	2702034	n	0	0	1928	none	illit	none	NA	TRUE	TRUE	NA	NA	y	4	y	y	y	y	y	y	NA	NA	TRUE	TRUE	NA	y	1944	NA	NA
N	Shaanxi	2702	2702035	y	1	1	1923	none	illit	none	NA	TRUE	TRUE	y	NA	y	4	y	n	y	y	y	y	NA	NA	TRUE	TRUE	NA	y	1943	TRUE	NA
N	Shaanxi	2702	2702036	y	1	1	1923	none	illit	none	none	TRUE	FALSE	n	NA	n	0	y	n	y	n	n	n	NA	NA	FALSE	TRUE	NA	n	1942	TRUE	NA
N	Shaanxi	2702	2702037	y	1	1	1930	none	illit	none	none	TRUE	FALSE	y	NA	y	3	y	n	y	n	y	n	NA	NA	FALSE	TRUE	NA	y	1949	TRUE	NA
N	Shaanxi	2702	2702038	y	1	1	1928	none	half	none	none	TRUE	FALSE	NA	NA	y	3	y	n	y	n	y	n	NA	NA	FALSE	TRUE	NA	n	1947	TRUE	NA
N	Shaanxi	2702	2702039	y	1	1	1930	none	half	none	none	TRUE	TRUE	y	NA	y	4	y	y	y	y	y	y	NA	NA	TRUE	TRUE	NA	y	1948	TRUE	NA
N	Shaanxi	2702	2702040	y	1	1	1928	none	illit	none	none	FALSE	FALSE	y	NA	n	3	n	n	n	n	n	n	NA	NA	FALSE	FALSE	NA	n	1945	TRUE	NA
N	Shaanxi	2702	2702041	y	1	NA	1925	none	illit	none	none	TRUE	FALSE	NA	NA	n	3	y	n	y	n	y	n	NA	NA	FALSE	TRUE	NA	y	1943	TRUE	NA
N	Shaanxi	2702	2702042	n	0	0	1928	none	illit	none	none	TRUE	FALSE	NA	NA	y	3	y	n	y	n	y	n	NA	NA	FALSE	TRUE	NA	y	1949	NA	NA
N	Shaanxi	2702	2702043	y	1	1	1925	none	illit	none	none	TRUE	FALSE	NA	NA	y	3	y	n	y	n	y	n	NA	NA	FALSE	TRUE	NA	n	1944	TRUE	NA
N	Shaanxi	2702	2702044	y	1	1	1928	none	illit	none	none	TRUE	FALSE	NA	NA	n	3	y	n	y	n	y	n	NA	NA	FALSE	TRUE	NA	y	1948	TRUE	NA
N	Shaanxi	2702	2702045	y	1	1	1925	some	half	none	none	TRUE	TRUE	y	NA	y	4	y	y	y	n	y	n	NA	NA	FALSE	TRUE	NA	y	1944	TRUE	NA
N	Shaanxi	2702	2702046	n	0	0	1924	none	illit	NA	NA	NA	NA	NA	NA	y	NA	NA	NA	NA	NA	NA	NA	NA	NA	FALSE	FALSE	NA	NA	1941	NA	NA
N	Shaanxi	2702	2702047	y	1	1	1927	none	illit	none	none	TRUE	TRUE	NA	NA	y	3	y	y	n	n	y	y	NA	NA	TRUE	TRUE	NA	n	1945	TRUE	NA
N	Shaanxi	2702	2702048	y	1	NA	1925	none	illit	none	NA	TRUE	TRUE	NA	NA	y	4	y	n	y	n	y	y	NA	NA	TRUE	TRUE	NA	y	1943	TRUE	NA
N	Shaanxi	2702	2702049	y	1	NA	1926	none	illit	none	none	TRUE	TRUE	y	NA	y	4	y	n	n	n	y	y	NA	NA	TRUE	TRUE	NA	y	1943	TRUE	NA
N	Shaanxi	2702	2702050	y	1	1	1929	none	illit	none	none	TRUE	FALSE	NA	NA	y	4	y	n	y	n	y	n	NA	NA	FALSE	TRUE	NA	y	1948	TRUE	NA
N	Shaanxi	2702	2702051	NA	NA	NA	1928	none	illit	none	some	TRUE	FALSE	y	NA	NA	4	y	n	y	n	y	n	NA	NA	FALSE	TRUE	NA	NA	1948	NA	NA
N	Shaanxi	2702	2702052	y	1	1	1922	none	illit	none	none	TRUE	TRUE	NA	NA	n	3	y	y	y	n	y	n	NA	NA	FALSE	TRUE	NA	n	1941	TRUE	NA
N	Shaanxi	2702	2702053	y	1	1	1930	none	illit	none	none	TRUE	FALSE	NA	NA	y	4	y	n	y	n	y	n	NA	NA	FALSE	TRUE	NA	y	1949	TRUE	NA
N	Shaanxi	2702	2702054	y	1	NA	1928	none	illit	NA	NA	TRUE	TRUE	y	NA	y	4	y	n	y	n	y	y	NA	NA	TRUE	TRUE	NA	y	1949	NA	NA
N	Shaanxi	2702	2702055	y	1	1	1928	none	illit	none	none	TRUE	TRUE	y	NA	y	4	y	y	y	y	y	y	NA	NA	TRUE	TRUE	NA	y	1945	TRUE	NA
N	Shaanxi	2702	2702056	n	0	0	1936	none	illit	none	none	TRUE	TRUE	NA	NA	NA	4	y	y	n	n	n	n	NA	NA	FALSE	FALSE	NA	y	1953	NA	NA
N	Shaanxi	2702	2702057	n	0	0	1940	none	illit	none	none	TRUE	NA	y	NA	NA	3	n	n	n	n	y	NA	NA	NA	FALSE	TRUE	NA	n	1964	NA	NA
N	Shaanxi	2702	2702058	n	0	0	1933	none	illit	none	NA	TRUE	FALSE	n	NA	y	3	y	n	y	n	y	n	NA	NA	FALSE	TRUE	NA	y	1949	NA	NA
N	Shaanxi	2702	2702059	n	0	0	1940	none	illit	none	none	TRUE	FALSE	y	NA	y	3	y	n	n	n	y	n	NA	NA	FALSE	TRUE	NA	n	1958	NA	NA
N	Shaanxi	2702	2702060	n	0	0	1940	some	half	none	none	TRUE	TRUE	y	NA	y	4	y	n	y	y	y	n	NA	NA	TRUE	TRUE	NA	y	1959	NA	NA
N	Shaanxi	2702	2702061	n	0	0	1940	none	lit	none	none	TRUE	TRUE	NA	NA	y	4	y	y	y	y	y	n	NA	NA	TRUE	TRUE	NA	y	1957	NA	NA
N	Shaanxi	2702	2702062	y	1	NA	1937	none	lit	none	NA	TRUE	FALSE	y	NA	y	4	y	n	y	n	n	n	NA	NA	FALSE	TRUE	NA	y	1957	TRUE	NA
N	Shaanxi	2702	2702063	n	0	0	1939	some	lit	none	none	TRUE	TRUE	y	NA	n	4	y	y	n	n	n	n	NA	NA	FALSE	FALSE	NA	y	1963	NA	NA
N	Shaanxi	2702	2702064	n	0	0	1939	none	illit	none	none	NA	NA	y	NA	n	NA	y	n	NA	NA	n	n	NA	NA	FALSE	FALSE	NA	n	1959	NA	NA
N	Shaanxi	2702	2702065	n	0	0	1938	none	illit	none	none	TRUE	FALSE	y	NA	NA	3	y	n	y	n	y	n	NA	NA	FALSE	TRUE	NA	n	1957	NA	NA
N	Shaanxi	2702	2702066	y	1	NA	1936	none	illit	none	none	TRUE	TRUE	y	NA	y	3	y	y	y	n	n	n	NA	NA	FALSE	TRUE	NA	n	1953	TRUE	NA
N	Shaanxi	2702	2702067	y	1	1	1931	none	illit	none	none	TRUE	TRUE	y	NA	n	3	y	y	n	n	n	n	NA	NA	FALSE	FALSE	NA	n	1947	TRUE	NA
N	Shaanxi	2702	2702068	n	0	0	1931	none	illit	none	none	TRUE	TRUE	y	NA	y	4	y	n	y	y	y	y	NA	NA	TRUE	TRUE	NA	y	1950	NA	NA
N	Shaanxi	2702	2702069	n	0	0	1932	none	illit	none	none	TRUE	FALSE	NA	NA	y	4	y	n	y	n	n	n	NA	NA	FALSE	TRUE	NA	y	1949	NA	NA
N	Shaanxi	2702	2702070	y	1	NA	1938	none	illit	none	none	TRUE	TRUE	NA	NA	y	3	y	n	y	n	y	y	NA	NA	TRUE	TRUE	NA	y	1955	TRUE	NA
N	Shaanxi	2702	2702071	n	0	0	1932	none	illit	none	none	TRUE	FALSE	y	NA	y	4	y	n	y	n	y	n	NA	NA	FALSE	TRUE	NA	y	1950	NA	NA
N	Shaanxi	2702	2702072	n	0	0	1940	none	illit	none	none	TRUE	FALSE	y	NA	y	4	y	n	y	n	y	n	NA	NA	FALSE	TRUE	NA	y	1956	NA	NA
N	Shaanxi	2702	2702073	n	0	0	1932	none	illit	none	none	TRUE	FALSE	y	NA	y	3	y	n	n	n	y	n	NA	NA	FALSE	TRUE	NA	n	1950	NA	NA
N	Shaanxi	2702	2702074	n	0	0	1932	some	half	none	NA	TRUE	FALSE	y	NA	NA	4	y	n	y	n	y	n	NA	NA	FALSE	TRUE	NA	y	1949	NA	NA
N	Shaanxi	2702	2702075	n	0	0	1931	none	illit	none	none	TRUE	FALSE	y	NA	y	4	y	n	n	n	y	n	NA	NA	FALSE	TRUE	NA	n	1951	NA	NA
N	Shaanxi	2702	2702076	y	1	1	1931	some	lit	some	NA	TRUE	TRUE	y	NA	y	4	y	n	n	n	y	y	NA	NA	TRUE	TRUE	NA	n	1950	TRUE	NA
N	Shaanxi	2702	2702078	n	0	0	1941	some	half	none	none	TRUE	TRUE	y	NA	NA	1	y	n	y	y	y	n	NA	NA	TRUE	TRUE	NA	n	1960	NA	NA
N	Shaanxi	2702	2702079	n	0	0	1941	none	half	none	some	TRUE	FALSE	y	NA	NA	3	y	n	y	n	y	n	NA	NA	FALSE	TRUE	NA	y	1960	NA	NA
N	Shaanxi	2702	2702088	n	0	0	1942	none	half	none	NA	TRUE	TRUE	y	NA	n	4	y	n	y	y	y	y	NA	NA	TRUE	TRUE	NA	y	1961	NA	NA
N	Shaanxi	2702	2702093	n	0	0	1941	none	illit	none	some	TRUE	FALSE	y	NA	NA	4	y	n	y	n	y	n	NA	NA	FALSE	TRUE	NA	y	1961	NA	NA
N	Shaanxi	2702	2702101	y	1	NA	1941	some	half	none	none	NA	NA	y	NA	y	3	y	y	NA	NA	y	n	NA	NA	FALSE	TRUE	NA	n	1960	TRUE	NA
N	Shandong	2801	2801001	n	0	0	1925	none	half	none	none	TRUE	FALSE	n	n	y	1	y	n	n	n	y	n	NA	NA	FALSE	TRUE	NA	n	1948	NA	NA
N	Shandong	2801	2801002	n	0	0	1939	some	lit	none	none	TRUE	TRUE	y	y	y	3	y	n	n	n	y	y	NA	NA	TRUE	TRUE	NA	n	1966	NA	NA
N	Shandong	2801	2801003	n	0	0	1935	none	illit	none	none	TRUE	FALSE	y	y	n	4	n	n	n	n	y	n	NA	NA	FALSE	TRUE	NA	n	1953	NA	NA
N	Shandong	2801	2801004	n	0	0	1935	none	illit	none	none	TRUE	FALSE	y	y	y	4	y	n	n	n	y	n	NA	NA	FALSE	TRUE	NA	n	1954	NA	NA
N	Shandong	2801	2801005	n	0	0	1939	none	illit	none	NA	TRUE	FALSE	y	y	n	3	y	n	n	n	y	n	NA	NA	FALSE	TRUE	NA	n	1960	NA	NA
N	Shandong	2801	2801006	n	0	0	1926	none	illit	none	none	TRUE	FALSE	y	y	n	3	y	n	n	n	y	n	NA	NA	FALSE	TRUE	NA	n	1948	NA	NA
N	Shandong	2801	2801007	y	1	1	1922	none	illit	none	none	TRUE	TRUE	n	y	n	4	y	n	y	n	y	y	NA	NA	TRUE	TRUE	11	y	1942	TRUE	9
N	Shandong	2801	2801008	n	0	0	1931	none	half	none	none	TRUE	TRUE	y	y	y	4	y	n	n	n	y	y	NA	NA	TRUE	TRUE	15	n	1956	NA	10
N	Shandong	2801	2801009	n	0	0	1930	none	illit	none	none	TRUE	TRUE	y	y	n	4	y	n	n	n	y	y	NA	NA	TRUE	TRUE	NA	y	1951	NA	NA
N	Shandong	2801	2801010	y	1	1	1927	none	illit	none	none	TRUE	TRUE	y	y	n	4	y	n	n	n	y	y	NA	NA	TRUE	TRUE	NA	n	1951	TRUE	NA
N	Shandong	2801	2801011	n	0	0	1938	none	illit	none	none	TRUE	FALSE	y	y	y	4	y	n	n	n	y	n	NA	NA	FALSE	TRUE	NA	n	1957	NA	NA
N	Shandong	2801	2801012	y	1	1	1928	none	illit	none	some	TRUE	TRUE	n	y	y	4	y	y	n	n	y	y	NA	NA	TRUE	TRUE	10	y	1947	TRUE	9
N	Shandong	2801	2801013	n	0	0	1938	none	half	none	none	TRUE	FALSE	y	y	y	3	y	n	n	n	y	n	NA	NA	FALSE	TRUE	NA	n	1960	NA	NA
N	Shandong	2801	2801014	n	0	0	1936	none	illit	none	none	TRUE	FALSE	n	n	y	1	y	n	n	n	y	n	NA	NA	FALSE	TRUE	NA	n	1954	NA	NA
N	Shandong	2801	2801015	n	0	0	1931	none	illit	none	none	TRUE	TRUE	y	y	y	3	y	n	n	n	y	y	NA	NA	TRUE	TRUE	NA	n	1950	NA	NA
N	Shandong	2801	2801016	n	0	0	1938	none	illit	none	none	TRUE	FALSE	y	y	y	1	y	n	n	n	y	n	NA	NA	FALSE	TRUE	NA	n	1958	NA	NA
N	Shandong	2801	2801017	y	1	1	1935	none	illit	none	none	TRUE	TRUE	y	y	y	4	y	n	n	n	y	y	NA	NA	TRUE	TRUE	12	n	1960	TRUE	13
N	Shandong	2801	2801018	n	0	0	1936	some	half	none	none	TRUE	FALSE	n	y	n	4	y	n	n	n	y	n	NA	NA	FALSE	TRUE	NA	n	1959	NA	NA
N	Shandong	2801	2801019	y	1	NA	1927	none	illit	none	none	TRUE	TRUE	n	y	n	3	y	n	n	n	y	y	NA	NA	TRUE	TRUE	NA	n	1941	TRUE	NA
N	Shandong	2801	2801020	y	1	1	1937	none	half	none	none	TRUE	FALSE	y	y	n	4	y	n	n	n	y	n	NA	NA	FALSE	TRUE	NA	n	1959	TRUE	NA
N	Shandong	2801	2801021	n	0	0	1935	none	illit	none	none	TRUE	FALSE	y	y	y	3	y	n	n	n	y	n	NA	NA	FALSE	TRUE	NA	n	1956	NA	NA
N	Shandong	2801	2801022	n	0	0	1938	none	illit	none	none	TRUE	TRUE	y	y	n	3	y	n	n	n	y	y	NA	NA	TRUE	TRUE	NA	n	1959	NA	NA
N	Shandong	2801	2801023	y	1	1	1936	none	illit	none	none	TRUE	TRUE	y	y	NA	3	y	n	n	n	y	y	NA	NA	TRUE	TRUE	20	n	1956	TRUE	0
N	Shandong	2801	2801024	n	0	0	1938	none	illit	none	none	TRUE	FALSE	y	y	y	4	y	n	n	n	y	n	NA	NA	FALSE	TRUE	NA	y	1959	NA	NA
N	Shandong	2801	2801025	n	0	0	1937	some	lit	none	none	TRUE	FALSE	y	y	y	4	y	n	n	n	y	n	NA	NA	FALSE	TRUE	NA	n	1960	NA	NA
N	Shandong	2801	2801026	n	0	0	1938	none	illit	none	some	TRUE	TRUE	y	y	n	3	y	y	n	n	y	n	NA	NA	FALSE	TRUE	10	n	1960	NA	12
N	Shandong	2801	2801027	y	1	NA	1918	none	illit	none	none	TRUE	TRUE	n	y	n	3	y	y	y	n	y	n	NA	NA	FALSE	TRUE	NA	y	1938	TRUE	NA
N	Shandong	2801	2801028	y	1	1	1932	none	illit	none	none	TRUE	FALSE	n	y	NA	4	y	n	n	n	y	n	NA	NA	FALSE	TRUE	15	n	1950	TRUE	3
N	Shandong	2801	2801029	n	0	0	1936	some	half	none	none	TRUE	FALSE	y	y	y	3	y	n	n	n	y	n	NA	NA	FALSE	TRUE	20	n	1959	NA	3
N	Shandong	2801	2801030	n	0	0	1938	none	illit	none	none	TRUE	FALSE	y	y	y	3	y	n	n	n	y	n	NA	NA	FALSE	TRUE	NA	n	1956	NA	NA
N	Shandong	2801	2801031	n	0	0	1938	none	illit	none	none	TRUE	TRUE	y	y	y	3	y	n	n	n	y	y	NA	NA	TRUE	TRUE	NA	n	1961	NA	NA
N	Shandong	2801	2801032	y	1	NA	1928	none	illit	none	none	TRUE	TRUE	y	y	n	3	y	n	y	n	y	y	NA	NA	TRUE	TRUE	11	n	1950	TRUE	11
N	Shandong	2801	2801033	y	1	NA	1926	some	half	none	some	TRUE	FALSE	n	y	n	4	y	n	y	n	y	n	NA	NA	FALSE	TRUE	NA	n	1949	TRUE	NA
N	Shandong	2801	2801034	y	1	NA	1921	none	illit	none	NA	TRUE	TRUE	y	y	y	4	y	n	y	n	y	y	NA	NA	TRUE	TRUE	16	n	1951	TRUE	14
N	Shandong	2801	2801035	y	1	1	1932	none	half	none	some	TRUE	TRUE	y	y	NA	3	y	n	n	n	y	y	NA	NA	TRUE	TRUE	15	n	1955	TRUE	8
N	Shandong	2801	2801036	n	0	0	1931	some	half	none	some	NA	TRUE	y	y	NA	NA	n	n	n	n	NA	y	NA	NA	TRUE	FALSE	NA	n	NA	NA	NA
N	Shandong	2801	2801037	y	1	1	1939	some	illit	none	some	TRUE	FALSE	n	y	y	NA	y	n	n	n	y	n	NA	NA	FALSE	TRUE	12	n	1959	TRUE	8
N	Shandong	2801	2801038	n	0	0	1931	none	illit	none	some	TRUE	FALSE	y	y	y	NA	y	n	n	n	y	n	NA	NA	FALSE	TRUE	NA	n	1950	NA	NA
N	Shandong	2801	2801039	y	1	1	1926	none	illit	none	none	TRUE	FALSE	y	y	y	3	y	n	n	n	y	n	NA	NA	FALSE	TRUE	NA	n	1946	TRUE	NA
N	Shandong	2801	2801040	n	0	0	1936	none	illit	none	none	NA	NA	n	n	n	1	n	n	n	n	NA	NA	NA	NA	FALSE	FALSE	NA	n	1959	NA	NA
N	Shandong	2801	2801041	n	0	0	1940	none	illit	none	none	TRUE	TRUE	y	y	y	4	y	n	n	n	y	y	NA	NA	TRUE	TRUE	15	n	1961	NA	6
N	Shandong	2801	2801042	y	1	1	1934	none	illit	none	some	TRUE	FALSE	y	y	y	3	y	n	n	n	y	n	NA	NA	FALSE	TRUE	12	n	1953	TRUE	7
N	Shandong	2801	2801043	y	1	NA	1932	none	illit	none	some	TRUE	TRUE	y	y	y	NA	y	n	n	n	y	y	NA	NA	TRUE	TRUE	NA	n	1959	TRUE	NA
N	Shandong	2801	2801044	n	0	0	1935	none	illit	none	some	TRUE	FALSE	y	y	y	3	y	n	n	n	y	n	NA	NA	FALSE	TRUE	NA	n	1956	NA	NA
N	Shandong	2801	2801045	n	0	0	1925	none	illit	none	some	TRUE	FALSE	y	y	y	3	y	n	n	n	y	n	NA	NA	FALSE	TRUE	NA	n	1949	NA	NA
N	Shandong	2801	2801046	n	0	0	1934	none	illit	none	none	TRUE	TRUE	y	y	y	3	y	n	n	n	y	y	NA	NA	TRUE	TRUE	NA	n	1951	NA	NA
N	Shandong	2801	2801047	y	1	NA	1935	none	illit	none	none	TRUE	TRUE	y	y	n	4	y	n	n	n	y	y	NA	NA	TRUE	TRUE	NA	n	1959	TRUE	NA
N	Shandong	2801	2801048	y	1	1	1935	none	illit	none	none	TRUE	FALSE	y	y	y	3	y	n	n	n	y	n	NA	NA	FALSE	TRUE	NA	n	1958	TRUE	NA
N	Shandong	2801	2801049	y	1	1	1933	none	illit	none	some	TRUE	TRUE	y	y	NA	4	y	n	y	n	y	y	NA	NA	TRUE	TRUE	7	n	1954	TRUE	14
N	Shandong	2801	2801050	y	1	1	1932	none	illit	none	none	TRUE	FALSE	y	y	n	3	y	n	n	n	y	n	NA	NA	FALSE	TRUE	NA	n	1957	TRUE	NA
N	Shandong	2801	2801051	n	0	0	1937	none	illit	none	some	TRUE	TRUE	n	y	n	NA	y	n	n	n	y	y	NA	NA	TRUE	TRUE	NA	n	1964	NA	NA
N	Shandong	2801	2801052	y	1	1	1925	none	illit	none	NA	TRUE	FALSE	y	y	y	1	y	n	n	n	y	n	NA	NA	FALSE	TRUE	NA	n	1946	TRUE	NA
N	Shandong	2801	2801053	y	1	1	1927	none	illit	none	none	TRUE	FALSE	n	y	y	3	y	n	n	n	y	n	NA	NA	FALSE	TRUE	NA	n	1946	TRUE	NA
N	Shandong	2801	2801054	y	1	1	1929	none	illit	none	none	TRUE	TRUE	y	y	y	3	y	n	n	n	y	y	NA	NA	TRUE	TRUE	20	y	1949	TRUE	0
N	Shandong	2801	2801055	y	1	NA	1933	none	illit	none	none	TRUE	TRUE	y	y	y	3	y	n	n	n	y	y	NA	NA	TRUE	TRUE	NA	n	1955	TRUE	NA
N	Shandong	2801	2801056	y	1	1	1930	none	illit	none	none	TRUE	TRUE	y	y	y	4	y	n	y	n	y	y	NA	NA	TRUE	TRUE	8	n	1947	TRUE	9
N	Shandong	2801	2801057	y	1	1	1936	none	illit	none	some	TRUE	TRUE	y	y	NA	4	y	n	n	n	y	y	NA	NA	TRUE	TRUE	NA	n	1960	TRUE	NA
N	Shandong	2801	2801058	y	1	1	1933	none	illit	none	some	TRUE	TRUE	n	y	y	3	y	n	n	n	y	y	NA	NA	TRUE	TRUE	14	n	1956	TRUE	9
N	Shandong	2801	2801059	n	0	0	1935	some	illit	none	none	TRUE	TRUE	n	y	y	4	y	n	n	n	y	y	NA	NA	TRUE	TRUE	NA	n	1955	NA	NA
N	Shandong	2801	2801060	n	0	0	1933	none	illit	some	some	TRUE	FALSE	n	y	y	3	y	n	n	n	y	n	NA	NA	FALSE	TRUE	NA	n	1949	NA	NA
N	Shandong	2801	2801061	n	0	0	1926	none	illit	NA	NA	TRUE	FALSE	n	y	y	3	y	n	n	n	y	n	NA	NA	FALSE	TRUE	NA	n	1945	NA	NA
N	Shandong	2801	2801062	n	0	0	1939	some	illit	none	none	TRUE	TRUE	y	y	y	3	y	n	n	n	y	y	NA	NA	TRUE	TRUE	30	n	1960	NA	-9
N	Shandong	2801	2801063	y	1	1	1935	none	illit	none	some	TRUE	TRUE	n	y	NA	3	y	n	n	n	y	y	NA	NA	TRUE	TRUE	16	n	1955	TRUE	4
N	Shandong	2801	2801064	y	1	1	1927	none	illit	none	none	TRUE	FALSE	y	y	n	1	y	n	n	n	y	n	NA	NA	FALSE	TRUE	NA	n	1945	TRUE	NA
N	Shandong	2801	2801065	y	1	1	1935	none	illit	none	none	TRUE	TRUE	y	y	NA	3	y	n	n	n	y	y	NA	NA	TRUE	TRUE	NA	n	1953	TRUE	NA
N	Shandong	2801	2801066	n	0	0	1932	none	illit	none	some	TRUE	FALSE	n	y	NA	3	y	n	n	n	y	n	NA	NA	FALSE	TRUE	19	n	1952	NA	1
N	Shandong	2801	2801067	n	0	0	1937	none	illit	none	some	TRUE	TRUE	y	y	NA	3	y	n	n	n	y	y	NA	NA	TRUE	TRUE	20	n	1961	NA	4
N	Shandong	2801	2801068	n	0	0	1934	none	illit	none	none	TRUE	FALSE	y	y	y	4	y	n	n	n	y	n	NA	NA	FALSE	TRUE	14	n	1956	NA	8
N	Shandong	2801	2801069	n	0	0	1930	none	illit	none	none	TRUE	FALSE	y	y	y	3	y	n	n	n	y	n	NA	NA	FALSE	TRUE	15.5	n	1959	NA	13.5
N	Shandong	2801	2801070	n	0	0	1938	none	illit	none	none	TRUE	FALSE	y	y	y	3	y	n	n	n	y	n	NA	NA	FALSE	TRUE	16	n	1957	NA	3
N	Shandong	2801	2801071	y	1	1	1933	none	illit	none	none	TRUE	TRUE	n	y	NA	3	y	n	n	n	y	y	NA	NA	TRUE	TRUE	NA	n	1952	TRUE	NA
N	Shandong	2801	2801072	n	0	0	1930	none	illit	none	none	TRUE	FALSE	y	y	y	NA	y	n	n	n	y	n	NA	NA	FALSE	TRUE	NA	n	1948	NA	NA
N	Shandong	2801	2801073	n	0	0	1935	none	illit	none	some	TRUE	FALSE	y	y	y	2	y	n	n	n	y	n	NA	NA	FALSE	TRUE	NA	n	1955	NA	NA
N	Shandong	2801	2801074	n	0	0	1930	none	illit	none	none	TRUE	FALSE	y	y	y	2	y	n	n	n	y	n	NA	NA	FALSE	TRUE	NA	n	1949	NA	NA
N	Shandong	2801	2801075	y	1	1	1935	none	illit	none	none	TRUE	FALSE	y	y	y	3	y	n	n	n	y	n	NA	NA	FALSE	TRUE	NA	n	1958	TRUE	NA
N	Shandong	2801	2801076	n	0	0	1935	none	illit	none	none	TRUE	FALSE	y	y	y	1	y	n	n	n	y	n	NA	NA	FALSE	TRUE	NA	n	1957	NA	NA
N	Shandong	2801	2801077	n	0	0	1940	none	illit	none	some	TRUE	FALSE	y	y	y	4	y	n	n	n	y	n	NA	NA	FALSE	TRUE	20	n	1966	NA	6
N	Shandong	2801	2801078	n	0	0	1939	none	illit	none	none	TRUE	FALSE	y	y	y	4	y	n	n	n	y	n	NA	NA	FALSE	TRUE	NA	n	1958	NA	NA
N	Shandong	2801	2801079	n	0	0	1938	none	illit	none	none	TRUE	FALSE	y	y	n	4	y	n	n	n	y	n	NA	NA	FALSE	TRUE	NA	n	1959	NA	NA
N	Shandong	2801	2801080	n	0	0	1929	none	illit	none	none	TRUE	FALSE	y	y	y	1	y	n	n	n	y	n	NA	NA	FALSE	TRUE	NA	n	1949	NA	NA
N	Shandong	2801	2801081	y	1	NA	1925	none	illit	none	none	TRUE	FALSE	NA	y	n	4	y	n	n	n	y	n	NA	NA	FALSE	TRUE	NA	n	1946	TRUE	NA
N	Shandong	2801	2801082	n	0	0	1936	none	illit	none	none	TRUE	FALSE	y	y	y	4	y	n	n	n	y	n	NA	NA	FALSE	TRUE	21	n	1957	NA	0
N	Shandong	2801	2801083	n	0	0	1928	none	illit	none	none	TRUE	FALSE	y	y	n	3	y	n	n	n	y	n	NA	NA	FALSE	TRUE	NA	n	1946	NA	NA
N	Shandong	2801	2801084	y	1	1	1931	none	illit	none	none	TRUE	FALSE	y	y	y	NA	y	n	n	n	y	n	NA	NA	FALSE	TRUE	13	n	1951	TRUE	7
N	Shandong	2801	2801085	y	1	1	1930	none	illit	none	none	TRUE	FALSE	y	y	y	3	y	n	n	n	y	n	NA	NA	FALSE	TRUE	19	n	1948	TRUE	-1
N	Shandong	2801	2801086	n	0	0	1937	none	illit	none	none	TRUE	FALSE	y	y	y	3	y	n	n	n	y	n	NA	NA	FALSE	TRUE	NA	n	1958	NA	NA
N	Shandong	2801	2801087	y	1	1	1931	none	illit	none	none	TRUE	FALSE	y	y	y	NA	y	n	n	n	y	n	NA	NA	FALSE	TRUE	NA	n	1950	TRUE	NA
N	Shandong	2801	2801088	n	0	0	1937	none	half	none	none	TRUE	FALSE	y	y	y	3	y	n	n	n	y	n	NA	NA	FALSE	TRUE	NA	n	1956	NA	NA
N	Shandong	2801	2801089	n	0	0	1936	none	illit	none	none	TRUE	FALSE	y	y	y	4	y	n	n	n	y	n	NA	NA	FALSE	TRUE	NA	n	1956	NA	NA
N	Shandong	2801	2801090	y	1	1	1918	none	illit	none	none	TRUE	FALSE	y	y	n	3	y	n	n	n	y	n	NA	NA	FALSE	TRUE	NA	n	1936	TRUE	NA
N	Shandong	2801	2801091	n	0	0	1931	some	lit	none	none	TRUE	FALSE	y	n	y	3	n	n	n	n	y	n	NA	NA	FALSE	TRUE	NA	n	1952	NA	NA
N	Shandong	2801	2801092	y	1	NA	1939	none	half	none	none	TRUE	TRUE	y	y	n	3	y	y	n	y	y	n	NA	NA	TRUE	TRUE	NA	n	1960	TRUE	NA
N	Shandong	2801	2801093	n	0	0	1934	none	illit	none	some	TRUE	FALSE	y	y	y	4	y	n	n	n	y	n	NA	NA	FALSE	TRUE	NA	n	1956	NA	NA
N	Shandong	2801	2801094	y	1	NA	1939	none	illit	none	none	TRUE	FALSE	y	y	n	3	n	n	n	n	y	n	NA	NA	FALSE	TRUE	NA	n	1959	TRUE	NA
N	Shandong	2801	2801095	n	0	0	1939	none	illit	none	none	TRUE	FALSE	y	y	y	4	y	n	n	n	y	n	NA	NA	FALSE	TRUE	NA	n	1959	NA	NA
N	Shandong	2801	2801096	n	0	0	1932	some	NA	none	none	TRUE	FALSE	n	y	n	NA	n	n	n	n	y	n	NA	NA	FALSE	TRUE	NA	n	1959	NA	NA
N	Shandong	2801	2801097	n	0	0	1933	none	illit	none	none	TRUE	FALSE	y	y	n	4	y	n	n	n	y	n	NA	NA	FALSE	TRUE	NA	n	1956	NA	NA
N	Shandong	2801	2801098	n	0	0	1939	some	lit	none	none	NA	NA	y	n	y	4	n	n	n	n	NA	NA	NA	NA	FALSE	FALSE	NA	n	1966	NA	NA
N	Shandong	2801	2801099	n	0	0	1935	some	lit	none	some	NA	NA	n	n	y	4	n	n	n	n	NA	NA	NA	NA	FALSE	FALSE	NA	n	1962	NA	NA
N	Shandong	2801	2801100	n	0	0	1936	some	lit	none	none	TRUE	FALSE	y	n	y	4	y	n	n	n	y	n	NA	NA	FALSE	TRUE	NA	n	1963	NA	NA
N	Shandong	2801	2801101	n	0	0	1936	none	illit	none	none	TRUE	FALSE	y	n	n	3	y	n	n	n	y	n	NA	NA	FALSE	TRUE	NA	n	1961	NA	NA
N	Shandong	2801	2801102	n	0	0	1932	some	lit	none	none	TRUE	TRUE	y	y	n	3	y	n	y	n	y	y	NA	NA	TRUE	TRUE	NA	n	1950	NA	NA
N	Shandong	2801	2801103	n	0	0	1938	none	illit	none	NA	TRUE	FALSE	y	y	y	4	y	n	n	n	y	n	NA	NA	FALSE	TRUE	NA	n	1962	NA	NA
N	Shandong	2801	2801104	y	1	NA	1937	none	illit	none	none	TRUE	FALSE	y	y	y	3	y	n	n	n	y	n	NA	NA	FALSE	TRUE	NA	n	1960	TRUE	NA
N	Shandong	2801	2801105	y	1	1	1934	none	illit	none	none	TRUE	FALSE	n	y	y	4	y	n	n	n	y	n	NA	NA	FALSE	TRUE	NA	n	1951	TRUE	NA
N	Shandong	2801	2801106	y	1	1	1928	none	illit	none	none	TRUE	TRUE	n	y	n	4	y	n	n	n	y	y	NA	NA	TRUE	TRUE	NA	n	1950	TRUE	NA
N	Shandong	2801	2801107	n	0	0	1936	some	illit	none	NA	TRUE	FALSE	y	y	NA	4	y	n	n	n	y	n	NA	NA	FALSE	TRUE	14.5	n	1960	NA	9.5
N	Shandong	2801	2801108	n	0	0	1939	none	illit	none	none	TRUE	FALSE	y	y	y	4	y	n	n	n	y	n	NA	NA	FALSE	TRUE	NA	n	1963	NA	NA
N	Shandong	2801	2801109	y	1	1	1934	none	illit	none	none	TRUE	TRUE	y	y	y	4	y	n	y	n	y	y	NA	NA	TRUE	TRUE	17.5	n	1960	TRUE	8.5
N	Shandong	2801	2801110	n	0	0	1934	none	illit	none	none	TRUE	TRUE	y	y	n	4	y	n	n	n	y	y	NA	NA	TRUE	TRUE	NA	n	1957	NA	NA
N	Shandong	2801	2801111	n	0	0	1934	none	half	none	none	TRUE	TRUE	y	y	y	4	y	n	n	n	y	y	NA	NA	TRUE	TRUE	NA	n	1958	NA	NA
N	Shandong	2801	2801112	y	1	NA	1938	none	illit	none	none	TRUE	FALSE	y	y	n	4	y	n	n	n	y	n	NA	NA	FALSE	TRUE	NA	y	1959	NA	NA
N	Shandong	2801	2801113	n	0	0	1938	some	lit	none	none	TRUE	TRUE	y	y	y	3	n	n	n	n	y	y	NA	NA	TRUE	TRUE	NA	n	1961	NA	NA
N	Shandong	2801	2801114	n	0	0	1932	none	illit	none	NA	TRUE	TRUE	n	y	y	4	y	n	n	n	y	y	NA	NA	TRUE	TRUE	10	n	1956	NA	14
N	Shandong	2801	2801115	y	1	NA	1931	none	illit	none	none	TRUE	FALSE	n	y	y	4	y	n	n	n	y	n	NA	NA	FALSE	TRUE	15.5	n	1952	TRUE	5.5
N	Shandong	2801	2801116	y	1	NA	1928	some	half	none	some	TRUE	FALSE	y	y	y	4	y	n	y	n	y	n	NA	NA	FALSE	TRUE	NA	n	1955	TRUE	NA
N	Shandong	2801	2801117	y	1	NA	1926	none	illit	none	none	TRUE	TRUE	n	y	n	4	y	n	n	n	y	y	NA	NA	TRUE	TRUE	17.5	n	1949	TRUE	5.5
N	Shandong	2801	2801118	y	1	1	1929	some	half	none	none	TRUE	TRUE	y	y	y	4	y	n	n	n	y	y	NA	NA	TRUE	TRUE	15.5	n	1955	TRUE	10.5
N	Shandong	2801	2801119	y	1	1	1921	none	illit	none	none	TRUE	TRUE	n	y	n	4	y	y	y	n	y	y	NA	NA	TRUE	TRUE	13.5	n	NA	NA	NA
N	Shandong	2801	2801120	n	0	0	1921	none	half	some	some	TRUE	TRUE	y	y	n	3	n	n	n	n	y	y	NA	NA	TRUE	TRUE	NA	n	NA	NA	NA
N	Shandong	2801	2801121	n	0	0	1935	none	illit	NA	none	TRUE	FALSE	y	y	y	4	y	n	n	n	y	n	NA	NA	FALSE	TRUE	NA	n	NA	NA	NA
N	Shandong	2801	2801122	y	1	1	1931	none	illit	none	none	TRUE	TRUE	n	y	y	3	y	n	n	n	y	y	NA	NA	TRUE	TRUE	12.5	n	1952	TRUE	8.5
N	Shandong	2801	2801123	y	1	1	1930	none	illit	none	NA	TRUE	TRUE	y	y	y	3	y	n	n	n	y	y	NA	NA	TRUE	TRUE	10	n	1952	TRUE	12
N	Shandong	2801	2801124	y	1	NA	1928	none	illit	none	none	TRUE	FALSE	n	y	n	3	n	n	n	n	y	n	NA	NA	FALSE	TRUE	20	n	1947	TRUE	-1
N	Shandong	2801	2801125	y	1	1	1923	none	illit	none	NA	TRUE	TRUE	y	y	y	4	y	n	n	n	y	y	NA	NA	TRUE	TRUE	13	n	1944	TRUE	8
N	Shandong	2801	2801126	y	1	1	1928	none	illit	none	some	TRUE	FALSE	y	y	y	3	y	n	n	n	y	n	NA	NA	FALSE	TRUE	12	n	1946	TRUE	6
N	Shandong	2801	2801127	y	1	1	1936	none	illit	none	NA	TRUE	TRUE	y	y	NA	4	y	n	n	n	n	y	NA	NA	TRUE	FALSE	14	n	1955	TRUE	5
N	Shandong	2801	2801128	y	1	1	1926	none	illit	none	NA	TRUE	FALSE	n	y	n	3	y	n	n	n	y	n	NA	NA	FALSE	TRUE	NA	n	1946	TRUE	NA
N	Shandong	2801	2801129	y	1	1	1926	none	illit	none	none	TRUE	FALSE	n	y	n	2	y	n	n	n	y	n	NA	NA	FALSE	TRUE	13	n	1947	TRUE	8
N	Shandong	2801	2801130	y	1	1	1929	none	illit	none	none	TRUE	TRUE	n	y	y	3	y	n	n	n	y	y	NA	NA	TRUE	TRUE	NA	n	1946	TRUE	NA
N	Shandong	2801	2801131	y	1	1	1934	none	illit	none	none	TRUE	TRUE	y	y	NA	4	y	n	n	n	y	y	NA	NA	TRUE	TRUE	NA	n	1961	TRUE	NA
N	Shandong	2801	2801132	n	0	0	1939	some	half	none	NA	TRUE	FALSE	y	y	y	3	y	n	n	n	y	n	NA	NA	FALSE	TRUE	12	y	1960	NA	9
N	Shandong	2801	2801133	y	1	1	1930	none	illit	none	NA	NA	NA	y	NA	y	4	y	NA	NA	n	y	y	NA	NA	TRUE	TRUE	20	n	1950	TRUE	0
N	Shandong	2801	2801134	n	0	0	1933	none	illit	none	some	TRUE	TRUE	y	y	n	4	y	n	n	n	y	y	NA	NA	TRUE	TRUE	13	n	1955	NA	9
N	Shandong	2801	2801135	y	1	1	1930	some	half	some	none	TRUE	TRUE	y	y	y	3	y	n	n	n	y	y	NA	NA	TRUE	TRUE	7	n	1948	TRUE	11
N	Shandong	2801	2801136	y	1	1	1933	none	illit	none	none	TRUE	TRUE	y	y	y	4	y	y	n	n	y	y	NA	NA	TRUE	TRUE	13	n	1959	TRUE	13
N	Shandong	2801	2801137	n	0	0	1921	none	illit	none	none	TRUE	FALSE	n	n	n	0	y	n	n	n	y	n	NA	NA	FALSE	TRUE	NA	n	1946	NA	NA
N	Shandong	2801	2801138	n	0	0	1926	none	illit	none	none	TRUE	TRUE	y	y	n	4	y	n	n	n	y	y	NA	NA	TRUE	TRUE	NA	n	1953	NA	NA
N	Shandong	2802	2802001	y	1	1	1929	none	half	none	none	TRUE	TRUE	y	y	y	0	y	y	n	n	y	n	NA	NA	FALSE	TRUE	12	n	1950	TRUE	9
N	Shandong	2802	2802002	y	1	NA	1929	none	half	none	none	TRUE	TRUE	y	n	y	0	y	y	n	n	y	n	NA	NA	FALSE	TRUE	13	n	1950	TRUE	8
N	Shandong	2802	2802003	y	1	1	1923	none	half	none	some	TRUE	FALSE	n	y	y	4	y	n	n	n	y	n	NA	NA	FALSE	TRUE	18	n	1944	TRUE	3
N	Shandong	2802	2802004	n	0	0	1938	none	half	none	some	TRUE	FALSE	y	NA	n	4	y	n	n	n	y	n	NA	NA	FALSE	TRUE	17	y	1959	NA	4
N	Shandong	2802	2802005	y	1	NA	1930	none	half	none	none	TRUE	TRUE	y	y	y	4	y	y	n	n	y	y	NA	NA	TRUE	TRUE	14	y	1949	TRUE	5
[truncated: 549 more rows]
